# Supplementary material for: Epidemiology and associated microbiota changes in deployed military personnel at high risk of traveler's diarrhea
Source: PLoS One. 2020 Aug 12;15(8):e0236703. doi: 10.1371/journal.pone.0236703 (PMC7423091; doi:10.1371/journal.pone.0236703)
Supplement: S1 Table — The raw data, plus a manually entered “CorrectedDate” column, are included. (XLSX) [file pone.0236703.s005.xlsx]

## Sheet: ipod_survey_curated
#Date Collected	Date Sent	Duration (seconds)	Numeric_ID	Good morning! What is the date today?	CorrectedDateDDMMYY	What time did you wake up today? (please use military time)	What did you eat for breakfast today?	Tap the camera button to take a photograph of your breakfast (optional)	How much of your breakfast did you eat?	What did you eat for lunch today?	Tap the camera button to take a photograph of your lunch (optional)	How much of your lunch did you eat?	What did you eat for dinner today?	Tap the camera button to take a photograph of your dinner (optional)	How much of it did you eat?	What snacks did you have today?	Bottled water	Base purified water	Tap water	Soda	Sports energy drink (e.g. Gatorade)	Coffee or tea	Milk	Fruit juice	Yogurt	Beer, wine, or spirits	How are you feeling today?	Fever	Gastrointestinal issues	Headache	Tiredness	Runny or blocked nose	Rash	Muscle strain	Cramp	What medication are you taking?	How much exercise did you do?	What type of exercise did you do?	How intense was your exercise?	How many times did you urinate today?	How many times did you have a bowel movement today?	Please describe the consistency of your stool.	What time did you get into bed before going to sleep today? (please use military time)
2016-04-21 20:46:00	2016-04-21 20:46:00	23235	1001	20160421	2016-04-21	440	Sc Scrambled Eggs Bacon Burrito Cottage Cheese Pecans Cranberries Fruit Punch		All of it	Grilled Chicken Mashed Potatoes And Gravy Lemonade Kiwi		All of it	Spaghetti Garlic Bread Cottage Cheese Lemonade		All of it			Base purified water			Sports energy drink (e.g. Gatorade)	Coffee or tea	Milk	Fruit juice	Yogurt		Good							Muscle strain			Less than 30 mins	Cardio	Easy	2019-05-03	3	Soft and formed (like peanut butter)	2030
2016-04-23 12:16:00	2016-04-23 12:15:00	142181	1001	2016422	2016-04-22	700	Cereal Milk Mint Oreos		All of it	Viel Steak Lemonade Mixed Vegtibles Mashed Potatoes And Gravy Coleslaw		All of it	Chicken Mashed And Gravy Burrito Watermelon Ice-Tea		All of it	Milk and Oreos		Base purified water			Sports energy drink (e.g. Gatorade)		Milk		Yogurt		Good							Muscle strain			Less than 30 mins		Easy	2019-05-03	1	Soft and formed (like peanut butter)	300
2016-04-24 22:16:00	2016-04-24 22:16:00	122410	1001	20160423	2016-04-23	730	Scrambled Eggs Oatmeal Cranberry's Coconut Strips Cottage Cheese Milk		3/4 of it	Cereal Milk		All of it	Chiken Rice Mashed Potatoes And Gravy Milk		All of it	Oreos gummy bears		Base purified water				Coffee or tea	Milk		Yogurt		Good							Muscle strain				None	Easy	2019-05-03	2	Soft and formed (like peanut butter)	1930
2016-04-24 22:24:00	2016-04-24 22:24:00	495	1001	20160424	2016-04-24	830	Oatmeal Yogurt Peanut Butter Bread Cottage Cheese Peacans Milk Bioled Eggs		All of it	Watermelon Grilled Chicken Salad Milk		All of it	Mashed Potatoes And Gravy Chicken Nuggets Chocolate Milk		All of it								Milk		Yogurt		Good							Muscle strain			30 mins to 1 hour	Swimming		2019-05-03	2	Soft and formed (like peanut butter)	2000
2016-04-25 22:53:00	2016-11-04 15:42:00	88132	1001	20160425	2016-04-25	440	Oatmeal Bioled Eggs Milk		All of it	Chicken And Rice Milk Watermellon		All of it	Pork Strips Mashed Potatoes Rice Watermelon Macaroni Salad Cottage Cheese Milk		All of it			Base purified water				Coffee or tea	Milk		Yogurt		Good							Muscle strain			1 to 2 hours	Wieghtlifting	Challenging	2019-05-03	4	Loose and unformed (like a thick milkshake)	2050
2016-04-26 23:27:00	2016-11-04 15:41:00	88438	1001	20160426	2016-04-26	440	Boiled Eggs Burrito Water		All of it	Pizza Chips And Salsa Chocolate Milk Yogurt		All of it	Mashed Potatoes And Gravy Tostitos Rice Chocolate Milk		All of it			Base purified water				Coffee or tea	Milk		Yogurt		Good							Muscle strain			1 to 2 hours	Wieghtlifting and cardio	Challenging	2019-05-03	3	Soft and formed (like peanut butter)	2130
2016-03-20 09:03:00	2016-03-28 09:57:00	223	1004	3102016	2016-03-10	450	Omlet, Refried Beans Watermelon		All of it	Chicken, Veggies		All of it			All of it		Bottled water					Coffee or tea		Fruit juice			Good										30 mins to 1 hour			2019-09-06		Hard and formed (like a cigar)	2000
2016-03-28 09:57:00	2016-03-28 09:57:00	635	1004	3112016	2016-03-11	450	Egg Whir With Tomatoe, Mushroom, Cheese Watermelon		All of it	Pizza Watermelon		All of it			All of it		Bottled water			Soda		Coffee or tea		Fruit juice			Good									Doxycycline	30 mins to 1 hour		Moderate	2019-09-06	3	Hard and formed (like a cigar)	2300
2016-03-28 10:02:00	2016-03-28 10:06:00	322	1004	3122013	2016-03-12	450	Egg White With Tomatoe, Mi		All of it	Cold Cut Combo From Subway Watermelon		All of it	No Dinner		All of it		Bottled water			Soda		Coffee or tea		Fruit juice			Good									Doxycycline	30 mins to 1 hour			2019-09-06	3	Soft and formed (like peanut butter)	2300
2016-03-28 10:06:00	2016-03-28 10:06:00	259	1004	3132016	2016-03-13	450	Egg Whites With Tomatoe, Mushroom, Cheese		All of it	Steak, Chicken, Almonds		All of it			All of it	Almonds	Bottled water		Tap water	Soda		Coffee or tea		Fruit juice			Good									Doxycycline	30 mins to 1 hour	Running	Moderate	2019-09-06	3	Hard and formed (like a cigar)	2000
2016-03-28 10:13:00	2016-03-28 10:13:00	200	1004	3142016	2016-03-14	450	Egg White Tomatoe Mushroom Cheese Jalapanio		All of it	Roated Chicken Raw Veggies Pizza Watermelon Almonds		All of it	Pizza		All of it	Almonds	Bottled water			Soda		Coffee or tea		Fruit juice													Less than 30 mins	Walking	Moderate	2019-09-06	3	Hard and formed (like a cigar)	2000
2016-03-28 10:17:00	2016-03-28 10:17:00	231	1004	3152016	2016-03-15	450	Egg White Mushroom Tomatoe Cheese Jalapanio		All of it	Cold Cut Combo From Subway		All of it	Protein Bar		All of it	Almonds	Bottled water			Soda		Coffee or tea		Fruit juice			Good									Doxycycline	Less than 30 mins	Walking	Moderate	2019-09-06	3	Hard and formed (like a cigar)	0
2016-03-28 10:22:00	2016-03-28 10:22:00	294	1004	3162016	2016-03-16	450	Eggwhite Tomatoe Mushroom Cheese Jalapanio		All of it	Pork Roast Corn Salad Sun Flower Seeds		All of it	Philly Cheese Steak Onion Rings		3/4 of it		Bottled water	Base purified water		Soda		Coffee or tea		Fruit juice			Good										30 mins to 1 hour	Running stretching	Moderate	2019-09-06	3	Hard and formed (like a cigar)	2300
2016-03-28 10:27:00	2016-03-28 10:27:00	302	1004	3172016	2016-03-17	450	Egg White Tomatoe Mushroom Cheese Jalpanio Refeied Beans		All of it	Chicken Taco Salad		All of it	No Dinner				Bottled water	Base purified water		Soda		Coffee or tea					Good									Doxycycline	30 mins to 1 hour		Challenging	2019-09-06	3	Soft and formed (like peanut butter)	2300
2016-03-28 10:31:00	2016-03-28 10:31:00	231	1004	3182016	2016-03-18	450	Egg White Tomstoe Mushroom Cheese Jalapanio		All of it	Porkchop Watermelon Salad Refried Beans		All of it	Salad		All of it	Almonds	Bottled water	Base purified water		Soda		Coffee or tea		Fruit juice			Good										Less than 30 mins	Walking	Moderate	2019-09-06	3	Hard and formed (like a cigar)	2300
2016-03-28 10:35:00	2016-03-28 10:35:00	248	1004	3192016	2016-03-19	450	Egg White Tomatoe Cheese Mushroom Jalapanio Refried Beans		All of it	Hot Dog Cheetos		All of it	Porkchop Potatoe Salad Raw Veggies		All of it		Bottled water	Base purified water		Soda		Coffee or tea		Fruit juice			Good		Gastrointestinal issues							Doxycycline	30 mins to 1 hour	Running		2019-09-06	3	Soft and formed (like peanut butter)	0
2016-03-28 10:39:00	2016-03-28 10:40:00	254	1004	3202016	2016-03-20	450	Egg White Tomatoe Mushroom Cheese Jalapanio Watermelon		All of it	Chicken Rice Veggies Potatoe Cake		3/4 of it	Beef Jerky Apple Almonds		All of it		Bottled water	Base purified water	Tap water	Soda		Coffee or tea		Fruit juice			Good									Doxycycline	30 mins to 1 hour	Running		2019-09-06	3	Hard and formed (like a cigar)	2300
2016-03-28 10:42:00	2016-03-28 10:42:00	175	1004	3212016	2016-03-21	450	Egg White Mushroom Cheese Tomatoe Jalapanio		All of it	Philly Cheese Steak Watermelon Onion Rings		All of it	Pizza		All of it		Bottled water	Base purified water		Soda		Coffee or tea		Fruit juice			Good									Doxycycline	30 mins to 1 hour	Running	Moderate	2019-09-06	3	Soft and formed (like peanut butter)	2300
2016-03-28 10:46:00	2016-03-28 10:46:00	220	1004	3222016	2016-03-22	450	Egg White Mushroom Tomatoe Cheese Jalapanio Watermelon		All of it	Rice Chicken Beans		3/4 of it	Almonds		All of it		Bottled water	Base purified water		Soda		Coffee or tea		Fruit juice			Good									Doxycycline	30 mins to 1 hour	Running	Moderate	2019-09-06	3	Soft and formed (like peanut butter)	2300
2016-03-28 10:51:00	2016-03-28 10:51:00	305	1004	3242016	2016-03-24	450	Egg White Tomatoe Cheese Mushroom Jalapanio Grits Watermelon		All of it	Mac And Cheese Potatoe Salad Tomatoe Salad		3/4 of it					Bottled water	Base purified water		Soda		Coffee or tea		Fruit juice			Good			Headache	Tiredness	Runny or blocked nose				Doxycycline tylenol	30 mins to 1 hour		Very Challenging	2019-09-06	4	Soft and formed (like peanut butter)	0
2016-03-28 10:58:00	2016-03-28 10:58:00	409	1004	3252016	2016-03-25	450	Egg White Tomatoe Mushroom Cheese Jalapanio		1/2 of it	Cold Cut Combo From Subway		All of it	Chips Peanuts Almonds		All of it		Bottled water	Base purified water				Coffee or tea		Fruit juice			Good									Doxycycline	30 mins to 1 hour			2019-09-06	3	Soft and formed (like peanut butter)	2100
2016-03-12 10:44:00	2016-03-20 12:14:00	172063	1006	10032016	2016-03-10	510	Scrambled Egg Whites, Hot Sauce, Corned Beef Hash, Watermellow, Pineapple, Banana		All of it	Beef Stew, Brown Rice, Green Beans, Carrots		All of it	subway 6" Italian Bmt, 3 Cookies		All of it	Protein shake		Base purified water			Sports energy drink (e.g. Gatorade)	Coffee or tea					Good							Muscle strain		Ibuprofen	1 to 2 hours	Morning prt (calisthenics), weightlifting (arms and shoulders)	Challenging	2019-05-03	1	Hard and formed (like a cigar)	2300
2016-03-12 10:49:00	2016-03-20 12:14:00	296	1006	11032016	2016-03-11	510	Egg White Omlet With Ham, Cheese, Tomatoes, And Mushrooms, Watermelon, Pineapple		All of it	Subway 6" Spicy Italian		All of it	Supreme Burritos, Chips And Salsa, Refried Beans		3/4 of it			Base purified water		Soda		Coffee or tea				Beer, wine, or spirits	Good							Muscle strain		Ibuprofen	30 mins to 1 hour	2 mile run	Challenging	2019-09-06	1	Hard and formed (like a cigar)	2300
2016-03-14 19:06:00	2016-03-20 12:14:00	199019	1006	12032016	2016-03-12	600	Egg White Omlete, Watermelon, Pineapple		All of it	Grilled Chicken Salad		All of it	Pork Schnitzel, Brown Rice, Carrots		All of it	Protein shake	Bottled water	Base purified water		Soda						Beer, wine, or spirits	Good									Ibuprofin, acetaminophen	1 to 2 hours	2.5 mile run, weightlifting (legs)	Challenging	2019-09-06	1	Hard and formed (like a cigar)	230
2016-03-14 19:11:00	2016-03-20 12:14:00	304	1006	13032016	2016-03-13	800	None			Plato Tipico		1/2 of it	Hamburger, Potato Chips		All of it		Bottled water	Base purified water			Sports energy drink (e.g. Gatorade)					Beer, wine, or spirits	Good									Ibuprofen, acetaminophen				2019-09-06	0		2200
2016-03-15 22:13:00	2016-03-20 12:14:00	97347	1006	14032016	2016-03-14	510	Scrambled Egg Whites, Hot Sauce, Turkey Sausage, Watermellon, Banana		All of it	Bbq Chicken, Red Besns And Rice, Brocolli		All of it	Chicken Skewers, Rice, Refried Beans, Avacado,		All of it			Base purified water			Sports energy drink (e.g. Gatorade)						Good							Muscle strain		Ibuprofen, acetaminophen, flexeril	30 mins to 1 hour	Last one up group run		2019-09-06	0		2200
2016-03-16 09:36:00	2016-03-20 12:14:00	40975	1006	15032016	2016-03-15	510	Scrambled Egg Whites, Hot Sauce, Turkey Sausage, Watermellon, Peaches		All of it	Butter Noodles, Beef Stroganof, Brussel Sprouts		All of it	Baked Fish, Brown Rice, Cauliflower		All of it	Ostrim stick, smoked almonds		Base purified water			Sports energy drink (e.g. Gatorade)						Good							Muscle strain		Ibuprofen, acetaminphen, flexeril	30 mins to 1 hour	Tabata	Challenging	2019-09-06	0		2200
2016-03-17 18:58:00	2016-03-20 12:14:00	29982	1006	16032016	2016-03-16	510	Scrambled Egg Whites, Turkey Sausage, Watermellon, Papaya		All of it	Baked Fish, Brown Rice, Cauliflower		All of it	Subway 6" Steak And Cheese, 3 Cookies		All of it	Smoked almonds	Bottled water	Base purified water				Coffee or tea				Beer, wine, or spirits	Good							Muscle strain		Ibuprofen, acetaminophen, flexeril	30 mins to 1 hour	Light calisthenics	Easy	2019-09-06	1	Hard and formed (like a cigar)	2230
2016-03-20 12:15:00	2016-03-20 12:14:00	235002	1006	19032016	2016-03-19	530	Egg White Omlet, Watermellon, Papaya		All of it	Baked Fish, Roasted Potatos, Carrots		All of it	Steak, Fish, Shrimp, Rice, Fried Potatos		1/2 of it		Bottled water	Base purified water			Sports energy drink (e.g. Gatorade)					Beer, wine, or spirits	Good									Ibuprofen	1 to 2 hours	10k run/walk	Challenging	2019-09-06	2	Hard and formed (like a cigar)	2300
2017-03-06 10:26:00	2017-03-06 10:27:00	305	1006	5152016	2016-05-15	900	Honey Stinger- Honey Waffle		All of it	Little Ceasars Cheese Pizza 3 Slices		All of it	1 Hamburger, Guacamole, Fried Tortilla Chips, Fried Plaintain		All of it	Buffalo blue cheese pretzel, smoke almonds	Bottled water				Sports energy drink (e.g. Gatorade)			Fruit juice		Beer, wine, or spirits	Good									Doxy	1 to 2 hours	Running and walking	Moderate				2300
2017-03-06 10:31:00	2017-03-06 10:31:00	191	1006	5172016	2016-05-17	500	Protein Bar		All of it	Beef, Brown Rice, Brussel Sprouts, Guacamole And Tortilla Chips		All of it	Chicken Salad, Macadamia Cookie, Chocolate Chip Cookie, Croutons,		All of it	Smoke almonds	Bottled water							Fruit juice			Good									Doxy	Less than 30 mins	Running and walking	Easy				2300
2017-03-06 10:35:00	2017-03-06 10:35:00	193	1006	5182016	2016-05-18	600	Banana, Peanut Butter		All of it	Spaguetti And Meat Sauce, Garlic Bread, Stir-fry Vegetables		All of it	Steak And Provelone Cheese Subway Sandwich, Broccoli Cheddar Soup		All of it	Osteim teriyaki, lemmon epper tuna, multi grain cracker	Bottled water							Fruit juice			Good									Doxy	Less than 30 mins	Running	Easy				2300
2017-03-06 10:51:00	2017-03-06 10:51:00	983	1006	5192016	2016-05-19	500	Protein Shake, 1 Mango		All of it	Grilled Steak, Baked Potatoes, Asparagus, Guacamole, Tortilla Chips		All of it	6 Inches Chicken Bacon And Ranch Subway		All of it	Garlic tuna	Bottled water							Fruit juice			Good									Doxy	1 to 2 hours	Strength training, swimming laps	Moderate				2300
2017-03-06 10:58:00	2017-03-06 10:58:00	390	1006	5202016	2016-05-20	600	3 Egg White Omelet With Ham, Cheese, Tomato		All of it	Brown Rice,chiken Soup, Breaded Veal Steaks		All of it	Grilled Chicken, Grilled Pork, Sliced Beef, White Rice, Refried Beans, Tortilla Chips, Fried Plaintain		All of it		Bottled water				Sports energy drink (e.g. Gatorade)			Fruit juice		Beer, wine, or spirits	Good									Doxy	30 mins to 1 hour	Running and bicycling	Moderate				2300
2017-03-06 11:03:00	2017-03-06 11:03:00	318	1006	5212016	2016-05-21	900	3 White Omelet With Ham, Cheese, Tomato, Watermelon And Pineapple		All of it	6 Inch Spicy Italian Subway		All of it	Grilled Chicken Breast, Grilled Smoked Sausage, Refried Beans, Tortilla Chips, Fried Plaintain		All of it	Clif shot blocks	Bottled water				Sports energy drink (e.g. Gatorade)			Fruit juice		Beer, wine, or spirits	Good									Doxy	1 to 2 hours	Bicycling	Challenging				2300
2017-03-06 11:09:00	2017-03-06 11:09:00	347	1006	5222016	2016-05-22	600	Yoghurt, Peanut Butter Pouch, 1 Banana		All of it	Grilled Pork Chop, Grilled Corn With Butter, Peppers And Onions Steamed, Chorizo, Tortilla Chips, Pico De Gallo, Guacamole,		All of it					Bottled water							Fruit juice	Yogurt	Beer, wine, or spirits	Good									Doxy							2200
2017-03-06 11:28:00	2017-03-06 11:28:00	1139	1006	5232016	2016-05-23	500	Protein Bar		All of it	Spaguetti And Meat Sauce, Garlic Bread, Mixed Vegetables		All of it	Baked Tilapia Fillet, Brown Rice, Steamed Carrots		All of it	Almonds with wasabi, multi grain crackers	Bottled water				Sports energy drink (e.g. Gatorade)						Good									Doxy	Less than 30 mins	Running	Easy				2330
2017-03-06 11:44:00	2017-03-06 12:40:00	991	1006	5242016	2016-05-24	500	Scrambled Eggs, Turkey Sausage Patties, Watermelon, Melon,		All of it	Buffalo Bleu Cheese Pretzel, Smoked Almonds		All of it					Bottled water				Sports energy drink (e.g. Gatorade)	Coffee or tea					Good									Doxy	2+ hours						2300
2017-03-06 11:46:00	2017-03-06 12:40:00	131	1006	5252016	2016-05-25	600	Protein Bar, Yogurt		All of it	Seafood, Brown Rice, Steamed Carrots		All of it	Link Soda		All of it		Bottled water			Soda	Sports energy drink (e.g. Gatorade)				Yogurt		Good									Doxy	Less than 30 mins	Running and walking	Easy				2300
2017-03-06 11:49:00	2017-03-06 12:40:00	173	1006	5262016	2016-05-26	500	3 Egg White Omelet With Ham, Cheese And Tomato, Watermelon		All of it	Fish Fries In Tempura, Sweet Sour Sauce, Baked Pinto Beans, Mixed Vegetables, Guacamole, Tortilla Chips		All of it				Clif shot blocks	Bottled water				Sports energy drink (e.g. Gatorade)						Good									Doxy	Less than 30 mins	Running	Easy				2300
2017-03-06 11:51:00	2017-03-06 12:40:00	130	1006	5272016	2016-05-27	500	Bacon Egg White Subway Sandwich		All of it	Sweet Onion Chicken Sandwich With Provolone Cheese		All of it			All of it		Bottled water							Fruit juice			Good									Doxy	Less than 30 mins	Elliptical trainer	Easy				2300
2017-03-06 11:55:00	2017-03-06 12:40:00	209	1006	5282016	2016-05-28	900	3 Egg White pmelet With Ham, Cheese Amd Tomato, Ranchero Salsa, Watermelon, Pineapple		All of it	Multi Grain Crackers, Tuna, Lentil Crackers And Red Pepper Hummus		All of it			All of it		Bottled water				Sports energy drink (e.g. Gatorade)			Fruit juice			Good									Doxy	Less than 30 mins	Running	Moderate				30
2017-03-06 11:58:00	2017-03-06 12:40:00	205	1006	5292016	2016-05-29	1000	3 Egg White Omelet With Ham, Cheese And Tomato, Ranchero Salsa, Melons Papaya		All of it	French Bread Pepperoni Pizza 2 Slices		All of it	Multi Grain Crackers, Tuna, Yogurt Greek		All of it		Bottled water							Fruit juice		Beer, wine, or spirits	Good									Doxy	30 mins to 1 hour	Running and bicycling	Moderate				2300
2017-03-06 12:11:00	2017-03-06 12:40:00	746	1006	5302016	2016-05-30	500	Protein Bar, Yogurt		All of it	Steamed Carrots, Potatoes, Breaded Chicken Wings		All of it	1 Hamburger With American Cheese, Baked Beans, Baked French Fries, Sun Chips Cheese		All of it	Beef and ostrich jerky	Bottled water				Sports energy drink (e.g. Gatorade)			Fruit juice		Beer, wine, or spirits	Good									Doxy	1 to 2 hours	Running, swimming laps	Moderate				2300
2017-03-06 12:15:00	2017-03-06 12:40:00	264	1006	5312016	2016-05-31	600	3 Egg White Omelet With Ham, Cheese And Tomato, Melons, Watermelon		All of it	Pizza Supreme 3 Slices, Corn Can, Guacamole, French Green Beans, Tortilla Chips		All of it	Baked Stuffed Pork Chop, Brown Rice, Giant Peas		All of it	Progein shake	Bottled water							Fruit juice			Good									Doxy							2300
2017-03-06 12:19:00	2017-03-06 12:40:00	214	1006	6012016	2016-06-01	500	Ham And Cheese Omelet, Peaches, Watermelon		All of it	Chalupa Pork, White Rice, Mixed Vegetables		All of it	Sweet Onion Chicken Samdwich With Provolone Cheese, Broccoli Cheddar Soup		All of it	Protein shake, almonds wasabi	Bottled water				Sports energy drink (e.g. Gatorade)			Fruit juice			Good									Doxy	Less than 30 mins	Running	Easy				2300
2017-03-06 12:22:00	2017-03-06 12:40:00	213	1006	6025016	2016-06-02	600	3 Egg White Omelet With Ham, Cheese And Tomato, Peaches And Watermelon		All of it	Multi Grain Crackers, Lemon Pepper Tuna, Mangos		All of it	Cheese Sticks, Stuffed Pepper, Chicken Breast Grilled, Grilled Smoked Sausage, Cheese Garlic Bread, Avocados		All of it	Protein shake, protein bar	Bottled water				Sports energy drink (e.g. Gatorade)			Fruit juice			Good									Doxy	30 mins to 1 hour	Strength training	Moderate				2300
2017-03-06 12:33:00	2017-03-06 12:40:00	662	1006	6032016	2016-06-03	600	Yogurt, Protein Bar,		All of it	Chicken Cordon Bleu, Vegetable Fried Rice, Steamed Carrots, Jalapeno Poppers, Ranch Dressing		All of it	Grilled Chicken Breast, Grilled Smoked Sausage, Garlic Bread, Refried Beans, Corn On The Cob		All of it		Bottled water							Fruit juice			Good									Doxy	30 mins to 1 hour	Running and bicycling	Moderate				2300
2017-03-06 12:38:00	2017-03-06 12:40:00	269	1006	6042016	2016-06-04	900	Watermelon, Papaya, 3 Egg Omelet With Ham, Cheese, Tomato		All of it	Multi Grain Cracker, Spicy Thai Tuna, Lentil Crackers And Hummus		All of it	6 Mild Buffalo Wings, French Fries		All of it	Almonds wasabi, smoked sausages	Bottled water				Sports energy drink (e.g. Gatorade)	Coffee or tea		Fruit juice		Beer, wine, or spirits	Good									Doxy	1 to 2 hours	Walking	Easy				2200
2017-03-06 12:44:00	2017-03-06 15:39:00	225	1006	6052016	2016-06-05	900	Watermelon, Pineapple, 3 Egg White Omelet With Ham, Cheese nd Tomato		All of it	Pork And Beef, Sour Kraut, Garlic Bread, Steamed Carrots, Roasted Yellow Squash		All of it	Stuffed Pepper, Brown Rice, Steamed Carrots		All of it	Power energy gel, smoked sausages, smoke almonds	Bottled water				Sports energy drink (e.g. Gatorade)			Fruit juice			Good									Doxy	30 mins to 1 hour	Running	Moderate				2330
2017-03-06 12:47:00	2017-03-06 15:39:00	192	1006	6062016	2016-06-06	600	Protein Bar, Yogurt		All of it	Shrimp Tempura Roll, Baked Potatoes, Creamed Asparagus		All of it	Steak And Cheese Sandwich With Provolone Cheese		All of it	Smoke almonds	Bottled water							Fruit juice			Good									Doxy	Less than 30 mins	Running	Easy				2300
2017-03-06 12:55:00	2017-03-06 15:39:00	469	1006	6072016	2016-06-07	600	Yogurt, Protein Bar		All of it	Pan-fried Veal, Brown Rice, Mixed Vegetables		All of it	Sweet Onion Chicken Sandwich With Provelone Cheese, Potato Soup		All of it	Pepperoni pizza crackers	Bottled water				Sports energy drink (e.g. Gatorade)					Beer, wine, or spirits	Good									Doxy	30 mins to 1 hour	Bicycling, running	Moderate				2300
2017-03-06 12:59:00	2017-03-06 15:39:00	277	1006	6082016	2016-06-08	600	Protein Bar, Greek Yogurt		All of it	Swiss Steak, Mashed Potatoes, Turkey Gravy, Garden Salad Slice, Italian Dressing		All of it	Spaguetti And Meat Sauce, Garlic Bread, Stir-fry Vegetables		All of it	Protein shake	Bottled water				Sports energy drink (e.g. Gatorade)			Fruit juice			Good									Doxy	1 to 2 hours	Running and strength training	Moderate				2300
2017-03-06 14:14:00	2017-03-06 15:39:00	4462	1006	6092016	2016-06-09	600	Protein Bar, Yogurt		All of it	Buttered Noodles, Meatballs, Peas And Carrots, Guacamole, Tortilla Chips		All of it	Buffalo Chicken With Ranch Subway		All of it		Bottled water							Fruit juice			Good									Doxy	Less than 30 mins	Running	Moderate				100
2017-03-06 14:17:00	2017-03-06 15:39:00	209	1006	6102016	2016-06-10	900	Protein Bar, Greek Yogurt		All of it	Pork Beef, Sour Kraut, Buttered And Herb Potatoes, Steamed Broccoli		All of it					Bottled water				Sports energy drink (e.g. Gatorade)			Fruit juice		Beer, wine, or spirits	Good									Doxy	2+ hours		Moderate				0
2017-03-06 14:23:00	2017-03-06 15:39:00	323	1006	6112016	2016-06-11	830	3 Egg White Omelet With Ham, Cheese And Tomato, Watermelon		All of it	Roasted Turkey Breast, Roasted Turkey Gravy, Glazed Sweet Potatoes		All of it				Protein shake	Bottled water				Sports energy drink (e.g. Gatorade)			Fruit juice			Good									Doxy	1 to 2 hours	Strength training	Moderate				2300
2017-03-06 14:27:00	2017-03-06 15:39:00	266	1006	6122016	2016-06-12	800	3 Egg White Omelet With Ham, Cheese, Tomato, Watermelon, Papaya, Melons		All of it	Buffalo Chicken With Ranch And Broccoli Cheddar Soup		All of it	6 Inches Buffalo Chicken Ranch, Tuna Sweet And Spicy And Multi Grain Crackers		All of it	Turkey sticks, smoke almonds,	Bottled water				Sports energy drink (e.g. Gatorade)			Fruit juice			Good									Doxy	30 mins to 1 hour	Running and strength training	Moderate				2300
2017-03-06 14:30:00	2017-03-06 15:39:00	185	1006	6132016	2016-06-13	600	Protein Bar, 1 Banana, Peanut Butter		All of it	Brown Rice, Grilled Chicken Breast, Sweet Sour Sauce, Stewed Tomatoes, Raw Guavas		All of it					Bottled water				Sports energy drink (e.g. Gatorade)			Fruit juice			Good									Doxy	Less than 30 mins	Running	Easy				2300
2017-03-06 14:40:00	2017-03-06 15:39:00	602	1006	6142016	2016-06-14	600	Protein Bar, Greek Yogurt		All of it	Roast Beef, Fried Popcorn Shrimp, Rice, Creamed Asparagus, Carrot Cake, Vanilla Soft Serve ice Cream,		All of it	Sweet Onion Chicken With Provolone Cheese		All of it	Honey stinger energy gel, protein shake	Bottled water				Sports energy drink (e.g. Gatorade)			Fruit juice			Good									Doxy	1 to 2 hours	Running and swimming laps	Moderate				2300
2017-03-06 14:44:00	2017-03-06 15:39:00	215	1006	6152016	2016-06-15	500	Protein Bar, Greek Yogurt		All of it	Salsa, Refried Beans, Grilled Peppers And Onions, Grilled Chicken Breast, Flour Tortilla, Watermelon, Guavas		All of it	Pepperoni Flatizza, Turkey Sticks		All of it	Smoke almonds, turkey sticks	Bottled water					Coffee or tea		Fruit juice			Good									Doxy			Moderate				2300
2017-03-06 14:47:00	2017-03-06 15:39:00	173	1006	6162016	2016-06-16	600	Protein Bar, Yogurt		All of it	Baked Tilapia Fillet, Brown Rice, Steamed Squash		All of it	Beef Lasagna, Garlic Bread, Mixed Vegetables		All of it	Protein shake	Bottled water				Sports energy drink (e.g. Gatorade)			Fruit juice	Yogurt	Beer, wine, or spirits	Good																2300
2017-03-06 14:48:00	2017-03-06 15:39:00	72	1006	6172016	2016-06-17	600	Protein Bar, Greek Yogurt,		All of it								Bottled water				Sports energy drink (e.g. Gatorade)				Yogurt	Beer, wine, or spirits	Good																2300
2017-03-06 14:50:00	2017-03-06 15:39:00	130	1006	6182016	2016-06-18	900	Banana, Protein Bar		All of it							Power gels 2 pouches, waffle	Bottled water							Fruit juice		Beer, wine, or spirits	Good										2+ hours	Swimming laps, bicycling, running	Challenging				0
2017-03-06 14:54:00	2017-03-06 15:39:00	254	1006	6192016	2016-06-19	1100	Lentil Crackers And Red Pepper Hummus, Tuna, Multi Grain Cracker		All of it				Meat French Bread Pizza, 4 Slices		All of it	Salted almonds	Bottled water				Sports energy drink (e.g. Gatorade)	Coffee or tea					Good																2300
2017-03-06 15:00:00	2017-03-06 15:39:00	350	1006	6202016	2016-06-20	600	Scrambled Egg Whites, Chunky Salsa, Turkey Sausage Patty, Watermelon, Papaya		All of it	1 Burger		All of it	Boiled Pork, Brown Rice, Steam Peas		All of it		Bottled water							Fruit juice			Good																2300
2017-03-06 15:06:00	2017-03-06 15:39:00	379	1006	6212016	2016-06-21	600	Protein Bar, Greek Yogurt		All of it	Fried Chicken Tenders, French Green Beans, Salad Dressing		All of it	Chicken Cordon Bleu, Fried Okra, Guacamole, Tortilla Chips		All of it	Power gel wnergizer	Bottled water				Sports energy drink (e.g. Gatorade)			Fruit juice	Yogurt		Good										30 mins to 1 hour	Running	Moderate				2300
2017-03-06 15:10:00	2017-03-06 15:39:00	221	1006	6222016	2016-06-22	600	Scrambled Eggs, Waffle With Maple Syrup And Butter, Watermelon,		All of it	Spicy Italian Subway With Provolone Cheese 6 Inches		All of it	Jasmine Rice, Steak Ranchero, Glazed Sweet Potatoes		All of it	Protein shakes	Bottled water				Sports energy drink (e.g. Gatorade)			Fruit juice			Good										Less than 30 mins	Running	Moderate				2300
2017-03-06 15:14:00	2017-03-06 15:39:00	225	1006	6232016	2016-06-23	600	Watermelon, Papaya, Scrambled Egg Whites, Mushrooms, Ham, Shredded Cheddar, Chunky Salsa		All of it	Marinated Fajita Beef, Flour Tortilla, Grilled Peppers And Onions, Refrisd Beans, Tortilla Soup, Tortilla Chips		All of it	Veal Parmesan, Buttered Noodles, Fried Tempura Cauliflower		All of it	Protein shake	Bottled water				Sports energy drink (e.g. Gatorade)			Fruit juice		Beer, wine, or spirits	Good										Less than 30 mins	Strength training	Moderate				2300
2017-03-06 15:17:00	2017-03-06 15:39:00	178	1006	6242016	2016-06-24	600	Protein Bar, Greek Yogurt		All of it	Spicy Italian Subway 6 In, White Chocolate Cookie, Chocolate Cookie		All of it	Roasted Garlic Chicken		All of it	Protein shake	Bottled water				Sports energy drink (e.g. Gatorade)			Fruit juice	Yogurt		Good										2+ hours	Running, strength training	Moderate				2300
2017-03-06 15:21:00	2017-03-06 15:39:00	235	1006	6252016	2016-06-25	800	Fried Plaintain, Bacon, Scrambled Eggs, Watermelon		All of it	Smoked Sausage, Grilled Chicken, Rice, Refried Beans, Corn On The Cob With Butter Grilled		All of it	Buffalo Chicken With Ranch Subway		All of it	Energy gel	Bottled water				Sports energy drink (e.g. Gatorade)					Beer, wine, or spirits	Good										2+ hours	Walking	Challenging				2430
2017-03-06 15:26:00	2017-03-06 15:39:00	182	1006	6272016	2016-06-27	600	Protein Bar, Yogurt		All of it	Creamy Ranch Dressing, Fried Chicken Tenders, Cooked Asparagus, Beown Rice		All of it	6 Inches Steak And Provolone Cheese Sandwich		All of it	Peotein shake, almonds wasabi	Bottled water				Sports energy drink (e.g. Gatorade)			Fruit juice	Yogurt		Good										2+ hours	Running and strength training	Challenging				2200
2017-03-06 15:30:00	2017-03-06 15:39:00	151	1006	6282016	2016-06-28	600	Protein Bar, Greek Yogurt		All of it	Spaghetti And Meat Sauce, Garlic Bread, Corn Can		All of it	Bbq Pulled Pork, Brown Rice, Brussel Sprouts,		All of it	Protein shake, almonds wasabi	Bottled water				Sports energy drink (e.g. Gatorade)			Fruit juice	Yogurt	Beer, wine, or spirits	Good										30 mins to 1 hour	Running	Moderate				2300
2017-03-06 15:35:00	2017-03-06 15:39:00	257	1006	6292016	2016-06-29	600	Protein Bar, Yogurt		All of it	Garden Salad, Italian Dressing, Brown Rice, Tempura Shrimp		All of it	Buffalo Chicken With Ranch Subway		All of it	Protein shake, almonds wasabi	Bottled water				Sports energy drink (e.g. Gatorade)			Fruit juice	Yogurt	Beer, wine, or spirits	Good										2+ hours	Running and strength training	Moderate				2300
2017-03-06 15:37:00	2017-03-06 15:39:00	156	1006	6302016	2016-06-30	600	Scrambled Eggs Whites, Chunky Salsa, French Toast, Butter And Maple Syrup, Watermelon And Pineapple		All of it								Bottled water							Fruit juice			Good										Less than 30 mins	Running	Easy				2300
2017-03-06 15:41:00	2017-03-06 17:59:00	109	1006	7012016	2016-07-01	800	Protein Bar, Yogurt		All of it	Multi Grain Cracker, Tuna, Turkey Snack Sticks		All of it				Chili lime beef jerkey	Bottled water				Sports energy drink (e.g. Gatorade)			Fruit juice	Yogurt		Good																2300
2017-03-06 15:45:00	2017-03-06 17:58:00	205	1006	7022016	2016-07-02	900	Protein Bar		All of it	Baked Ham, Raisin Sauce, Brown Rice, French Gren Beans, Zucchini		All of it	White Rice, Fried Okra, Parmesan Crusted Chicken		All of it	Turkey snack sticks, 2 protein shakes, m&m chocolate,	Bottled water				Sports energy drink (e.g. Gatorade)					Beer, wine, or spirits	Good										2+ hours	Strength training	Challenging				2300
2017-03-06 16:08:00	2017-03-06 17:58:00	1411	1006	7032016	2016-07-03	900	Protein Bar, Greek Yogurt		All of it	Supreme Pizza, Ranch Dressing		All of it	6 Inch Spicey Italian Subway		All of it	Frappuchino	Bottled water				Sports energy drink (e.g. Gatorade)	Coffee or tea					Good										30 mins to 1 hour	Running	Moderate				2300
2017-03-06 16:39:00	2017-03-06 17:59:00	1850	1006	7042016	2016-07-04	800	Scrambled Eggs Whites, Mushrooms, Ham, Shredded Cheddar, Chunky Salsa, Watermelon And Peaches		All of it	Braised Beef And Noodles, Mixed Vegetables		All of it					Bottled water				Sports energy drink (e.g. Gatorade)			Fruit juice			Good																2300
2017-03-06 16:43:00	2017-03-06 17:59:00	213	1006	7052016	2016-07-05	600	Protein Bar, Yogurt		All of it								Bottled water				Sports energy drink (e.g. Gatorade)	Coffee or tea					Good										1 to 2 hours	Strength training	Moderate				2300
2017-03-06 16:46:00	2017-03-06 17:59:00	173	1006	7062016	2016-07-06	600	Protein Bar, Banana, Peanut Butter		All of it								Bottled water				Sports energy drink (e.g. Gatorade)			Fruit juice			Good										2+ hours	Running and strength training	Challenging				2300
2017-03-06 16:51:00	2017-03-06 17:58:00	291	1006	7072016	2016-07-07	600	Scrambled Egg Whites, Diced Tomato And Sweet Onion, Ranchero Salsa, Watermelon And Peaches		All of it	Roast Pork Loin, Potato Boiled, Steamed Broccoli, Steamed Carrots, Corn Can, Guacamole, Tortilla Chips		All of it	Buffalo Chicken With Ranch Subway		All of it	Protein shake, smoke almonds	Bottled water				Sports energy drink (e.g. Gatorade)					Beer, wine, or spirits	Good										1 to 2 hours	Strength training	Moderate				2300
2017-03-06 16:53:00	2017-03-06 17:59:00	152	1006	7082016	2016-07-08	600	Protein Bar, Banana, Peanut Butter		All of it	Fried Chicken, Cauliflower, Baked Potatoes		All of it	Meatballs, Zucchini, Garlic Bread, Spaghetti Cup		All of it	Protein shake	Bottled water				Sports energy drink (e.g. Gatorade)						Good										1 to 2 hours	Running and strength training	Moderate				2300
2017-03-06 16:56:00	2017-03-06 17:58:00	149	1006	7092016	2016-07-09	800	Scrambled Egg Whites, Mushrooms, Ham, Cheddar, Chunky Salsa, Fried Plaintain, Watermelon, Papaya		All of it	Multi Grain Crackers, Tuna, Smoke Almonds		All of it					Bottled water							Fruit juice													2+ hours	Running and strength training	Moderate				2300
2017-03-06 16:59:00	2017-03-06 17:59:00	216	1006	7102016	2016-07-10	900	Protein Bar, Banana, Peanut Butter		All of it	Pico De Gallo, Red Beans And Rice, Sausage, Grilled Sweet Plaintain		All of it	Steak Ranchero, White Rice, Cooked Asparagus		All of it	Protein shake	Bottled water				Sports energy drink (e.g. Gatorade)			Fruit juice			Good										1 to 2 hours	Strength training	Moderate				2300
2017-03-06 17:02:00	2017-03-06 17:59:00	173	1006	7112016	2016-07-11	600	Yogurt, Protein Bar		All of it	Chicken, Cordon Bleu, Rice, Cypress Cafe		All of it	Parmesan Crusted Chicken, Deep Fried Cauliflower, Vanilla Soft Serve Ice Cream, Blueberry Pie		All of it	Protein shake, ostrim teriyaki jerky	Bottled water				Sports energy drink (e.g. Gatorade)			Fruit juice			Good										1 to 2 hours	Strength training	Moderate				2300
2017-03-06 17:05:00	2017-03-06 17:58:00	178	1006	7122016	2016-07-12	600	Protein Bar, Yogurt		All of it	Lasagna With Meat And Sauce, Fridd Okra, Garlic Bread		All of it	6 Inch Spicey Italian Subway With Pepper Jack Cheese		All of it	Protein shake	Bottled water				Sports energy drink (e.g. Gatorade)			Fruit juice			Good										1 to 2 hours	Strength training	Challenging				2300
2017-03-06 17:08:00	2017-03-06 17:59:00	155	1006	7132016	2016-07-13	600	Protein Bar, Yogurt		All of it	Parmesan Crusted Chicken, Succotash		All of it	6 Inches Spicey Italian Subway With Pepper Jack Cheese		All of it	Protein shake, tuna, multi grain cracker	Bottled water				Sports energy drink (e.g. Gatorade)			Fruit juice	Yogurt		Good										1 to 2 hours	Running and strength training	Moderate				2300
2017-03-06 17:11:00	2017-03-06 17:58:00	174	1006	7142016	2016-07-14	600	Protein Bar, Yogurt		All of it	White Rice, Asaparagus, Grilled Chicken		All of it	Beef Stir-fry, White Rice, Watermelon		All of it		Bottled water				Sports energy drink (e.g. Gatorade)				Yogurt		Good										Less than 30 mins	Running	Easy				2300
2017-03-06 17:15:00	2017-03-06 17:59:00	262	1006	7172016	2016-07-17	1000	Protein Bar		All of it	Potato Chips, Lentil Crackers nd Red Pepper Hummus		All of it	Refried Beans, Tortilla Chips, Steak, Red Beans And Rice		All of it	Banana, peanut butter, protein shake,	Bottled water			Soda	Sports energy drink (e.g. Gatorade)			Fruit juice			Good										2+ hours	Running and strength training	Challenging				2300
2017-03-06 17:17:00	2017-03-06 17:59:00	145	1006	7182016	2016-07-18	600	Protein Bar, Greek Yogurt		All of it	Garden Salad, Oil Vinegar Dressing, Brown Rice, Fried Chicken		All of it	Buffalo Chicken With Ranch Subway		All of it	Protein shake	Bottled water				Sports energy drink (e.g. Gatorade)				Yogurt		Good										1 to 2 hours	Running and strength training	Moderate				2300
2017-03-06 17:20:00	2017-03-06 17:58:00	165	1006	7192016	2016-07-19	600	Protein Bar, Greek Yogurt		All of it	Baked Salmon, Brown Rice, Mixed Vegetables, Guavas		All of it	Steak And Provolone Cheese Sandwich, Potato Soup		All of it	Protein shake, peanuts	Bottled water				Sports energy drink (e.g. Gatorade)						Good										1 to 2 hours	Strength training	Moderate				2300
2017-03-06 17:23:00	2017-03-06 17:58:00	152	1006	7202016	2016-07-20	600	Protein Bar, Yogurt		All of it	Steak And Cheese Subway With Provolone Cheese, Nutella And Crackers		All of it	6 Inch Spicey Italian Subway With Pepper Jack Cheese		All of it	Protein shake	Bottled water				Sports energy drink (e.g. Gatorade)			Fruit juice	Yogurt		Good										30 mins to 1 hour	Running	Moderate				2300
2017-03-06 17:26:00	2017-03-06 17:59:00	211	1006	7212016	2016-07-21	600	Scrambled Egg Whites, Mushrooms, Ham, Cheddar, Chunky Salsa, Watermelon And Pineapple		All of it	Pepperoni Pizza 2 Slices		All of it	6 Inch Spicey Italian Subway With Pepper Jack Cheese, Nuts And Dried Fruits		All of it	Protein shake, plaintain chips	Bottled water			Soda	Sports energy drink (e.g. Gatorade)			Fruit juice	Yogurt		Good										2+ hours	Running and strength training	Challenging				2200
2017-03-06 17:31:00	2017-03-06 17:59:00	268	1006	7222016	2016-07-22	600	Protein Bar, Banana, Nutella		All of it	Chicken Cordon Bleu, Rice, Zucchini		All of it	Chili Hamburger, Stir Fry Vegetables, Steamed Broccoli And Cauliflower		All of it	Milk chocolate bar, protein shake	Bottled water				Sports energy drink (e.g. Gatorade)			Fruit juice	Yogurt		Good										1 to 2 hours	Bicycling, strength training	Moderate				2300
2017-03-06 17:34:00	2017-03-06 17:59:00	196	1006	7232016	2016-07-23	900	Protein Bar		All of it	French Fries, Buffalo Wild Wings		All of it	Buffalo Chicken, Provelone Cheese, Broccoli Cheddar Soup		All of it	Power energy gel, protein shake, almonds wasabi	Bottled water			Soda	Sports energy drink (e.g. Gatorade)						Good										2+ hours	Running and strength training	Moderate				2300
2017-03-06 17:36:00	2017-03-06 17:59:00	144	1006	7242016	2016-07-24	900	Protein Bar		All of it	Buffalo Chicken With Ranch And Provolone Cheese		All of it			All of it		Bottled water							Fruit juice			Good																2300
2017-03-06 17:39:00	2017-03-06 17:58:00	162	1006	7252016	2016-07-25	600	Protein Shake, Protein Bar, Greek Yogurt		All of it	Swafood, White Rice, Sweet Potatoes		All of it	Supreme Pizza		All of it	Protein shake, teriyaki jerky	Bottled water					Coffee or tea		Fruit juice	Yogurt		Good										1 to 2 hours	Strength training and running	Challenging				2300
2017-03-06 17:41:00	2017-03-06 17:59:00	138	1006	7262016	2016-07-26	600	Protein Bar, Greek Yogurt		All of it	Hawaiiam Pizza 2 Slices, Guacamole, Tortilla Chips		All of it	Supreme Pizza 2 Slices		All of it	Protein shake, almonds wasabi	Bottled water							Fruit juice	Yogurt		Good										1 to 2 hours	Strength training	Moderate				2300
2017-03-06 17:48:00	2017-03-06 17:59:00	422	1006	7272016	2016-07-27	600	Protein Bar, Greek Yogurt		All of it	Chicken Cordon Bleu, Jalapeno Poppers, Buttered Noodles, Aspaagus		All of it	Buffalo Chicken With Ranch Subway And Provolone Cheese, Potato Soup		All of it	Power energy gel, mocha cappuccino swirl	Bottled water				Sports energy drink (e.g. Gatorade)	Coffee or tea			Yogurt		Good										30 mins to 1 hour	Running	Moderate				2300
2017-03-06 17:54:00	2017-03-06 17:59:00	306	1006	7282016	2016-07-28	600	Protein Bar, Nutella, Banana		All of it	Grilled Steak, Friwd Popcorn Shrimp, Yellow Rice, Grilles Onions And Mushrooms		All of it	Grilled Salmon, Macaroni And Cheese, Cooked Brussels Sprouts		All of it	Mocha cappuccino swirl	Bottled water					Coffee or tea					Good										1 to 2 hours	Strength training	Moderate				30
2017-03-06 17:56:00	2017-03-06 17:59:00	154	1006	7292016	2016-07-29	600	Peotwin Bar, Greek Yogurt		All of it	Spicey Italian And Pepper Jack Subway		All of it					Bottled water				Sports energy drink (e.g. Gatorade)				Yogurt		Good										2+ hours	Running and stregth training	Challenging				100
1970-01-12 00:11:00	2016-12-25 20:23:00	243	1006	7082016	2016-08-07	500	1 Protein Bar, Banana, Peanut Butter		All of it	Fried Chicken, Cauliflower, Baked Potatoes		All of it	Meatballs, Zucchini, Garlic Bread, Spaghetti		All of it	Whey protein	Bottled water				Sports energy drink (e.g. Gatorade)			Fruit juice			Good										1 to 2 hours	Running	Moderate				NA
2017-03-06 18:01:00	2017-03-06 18:06:00	148	1006	8082016	2016-08-08	600	Protein Bar And Greek Yogurt		All of it	Mixed Vegetables, Buttered Noodles, Meatballs		All of it	Steak And Cheese Subway With Mozzarella Cheese		All of it	Almonds wasabi	Bottled water								Yogurt		Good										Less than 30 mins	Running	Easy				2300
2017-03-06 18:05:00	2017-03-06 18:06:00	204	1006	8092016	2016-08-09	600	Protein Bar, Greek Yogurt		All of it	Baked Chicken, Tempura Shrimp, Vegetable Egg Roll, Guacamole, Tortilla Chips		All of it	Squash And Zucchini, Mashed Potatoes, Cafe Vienna		All of it	Moccha cappuccino swirl, almonds wasabi, crackers	Bottled water				Sports energy drink (e.g. Gatorade)	Coffee or tea			Yogurt		Good										1 to 2 hours	Strength training					2300
2017-03-07 09:09:00	2017-03-07 09:59:00	230	1006	8102016	2016-08-10	600	Protein Bar, Greek Yogurt		All of it	Steak, Mushroom Rice, Mixed Vegetables, Strawberries, Caramel, Soft Serve Ice Cream		All of it	Pepperoni Pizza 4 Slices		All of it	Power gel energizer, protein shake, crackers and tuna	Bottled water				Sports energy drink (e.g. Gatorade)				Yogurt		Good										2+ hours	Running and strength training	Challenging				2300
2017-03-07 09:12:00	2017-03-07 09:59:00	167	1006	8112016	2016-08-11	600	Protein Bar, Banana, Vanilla Pudding, Protein Shake		All of it	Herb Baked Chicken, Red Beans And Rice, Steamed Carrots		All of it	Philly Steak And Cheese Sandwich		All of it	Ostrim teriyaki jerky	Bottled water							Fruit juice			Good																2300
2017-03-07 09:15:00	2017-03-07 09:59:00	164	1006	8122016	2016-08-12	530	Scrambled Egg Whites, Mushrooms, Ham, Cheddar, Chunky Salsa, Apple Turnover, Watermelon, Papaya		All of it	Garden Salad, Robusto Italian Dressing, Potatoes With Butter, Meatballs		All of it	Pizza 4 Slices		All of it		Bottled water										Good																2300
2017-03-07 09:20:00	2017-03-07 09:59:00	296	1006	8132016	2016-08-13	800	Scrambled Egg Whites, Mushrooms, Ham, Cheddar, Chunky Salsa, Fried Plaintain, Watermelon, Pineapple		All of it	6 Inch Spicey Italian Subway With Provolone Cheese, Potato And Bacon Soup, 2 Chocolate Cookies		All of it	6 Inch Spicey Italian Subway With Provelone Cheese,		All of it	Protein shake, peanut butter, power energy gel, dark chocolate chunk bars, smoked sausages,	Bottled water				Sports energy drink (e.g. Gatorade)					Beer, wine, or spirits	Good										1 to 2 hours	Running	Challenging				100
2017-03-07 09:23:00	2017-03-07 09:59:00	178	1006	8142016	2016-08-14	1000	Banana, Chocolate Pudding, Greek Yogurt		All of it	Meatballs And Mozz Sandwich, Cracker Chips		All of it	Pepperoni Pizza With Gatlic Crust 2 Slices		All of it	Protein shake, tuna and crackers, smoked sausages	Bottled water							Fruit juice	Yogurt		Good										30 mins to 1 hour	Strength training	Moderate				2300
2017-03-07 09:25:00	2017-03-07 09:59:00	141	1006	8152016	2016-08-15	600	Greek Yogurt, Protein Bar		All of it	Carne Asada, Flour Tortilla, Salsa, Cheese Sticks		All of it	Pepperoni Pizza 4 Slices		All of it	Cracker chips	Bottled water								Yogurt		Good																2300
2017-03-07 09:26:00	2017-03-07 09:59:00	67	1006	8162016	2016-08-16	600	Protein Bar, Greek Yogurt		All of it								Bottled water							Fruit juice	Yogurt		Good																2300
2017-03-07 09:29:00	2017-03-07 09:59:00	149	1006	8222016	2016-08-22	600	Protein Bar, Greek Yogurt		All of it	Pork Ribs, White Rice, Peas And Carrots		All of it	Buffalo Chicken With Ranch Subway 6 Inches, Broccoli Cheddar Soup		All of it	2 chocolate cookies	Bottled water								Yogurt		Good										Less than 30 mins	Running	Easy				2300
2017-03-07 09:31:00	2017-03-07 09:59:00	171	1006	8232016	2016-08-23	600	Protein Bar, Greek Yogurt, Ostrim Teriyaki Jerky		All of it	Potato Chips, Pepperoni Pizza Sandwich		All of it	Italian Style Meatballs And Mozzarella Sandwich		All of it	Crackers and spicy thai chili tuna	Bottled water								Yogurt		Good										Less than 30 mins	Running	Easy				2300
2017-03-07 09:34:00	2017-03-07 09:59:00	180	1006	8242016	2016-08-24	600	Protein Bars 2		All of it	Grilled Pork Chop, Buttered Potatoes, Steamed Broccoli, Steamed Squash		All of it	Steak And Cheese Meal, Salt And Vinegar Potato Chips		All of it	Ambrosia, almons wasabi, crackers, smoked sausages, protein bar	Bottled water				Sports energy drink (e.g. Gatorade)			Fruit juice	Yogurt		Good										30 mins to 1 hour	Running	Moderate				2300
2017-03-07 09:38:00	2017-03-07 09:59:00	188	1006	8252016	2016-08-25	600	Protein Bar, Lentil Crackers And Hummus		All of it	Salt And Vinegar Potato Chips, Pepperoni Pizza 2 Slices, Vanilla Pudding		All of it	Pepperoni Pizza 4 Slices		All of it	Protein shake, protein bar, almonds wasabi, ostrim teriyaki jerky, crackers	Bottled water				Sports energy drink (e.g. Gatorade)						Good										1 to 2 hours	Strength training, walking	Moderate				2300
2017-03-07 09:40:00	2017-03-07 09:59:00	175	1006	8262016	2016-08-26	600	Protein Bar, Peanut Butter, Crackers		All of it	Chicken Cordon Bleu, Baked Potato, Steamed Carrots, Yuka		All of it	Baked Tilapia Fillet, Rice Pilaf, Green Beans, Tortilla Soup, Tortilla Chips, Guavas, Watermelon		All of it		Bottled water										Good										2+ hours	Yoga, strength training	Challenging				2330
2017-03-07 09:43:00	2017-03-07 09:59:00	99	1006	8272016	2016-08-27	800	Scrambled Egg Whites, Mushrooms, Ham, Cheddar, Chunky Salsa, Buscuit And Sausage Gravy, Watermelon And Papaya		All of it								Bottled water										Good										1 to 2 hours	Walking	Easy				2300
2017-03-07 09:51:00	2017-03-07 09:59:00	425	1006	8282016	2016-08-28	900	Protein Bar, Banana, Nutella, Crackers		All of it	Spicy Italian Subway With Provolone Cheese And Vinegar Potato Chips		All of it	Tomato And Basil Chicken Sausages, Pepperoni Pizza 2 Slicea, Tuna And Crackers		All of it	Protein shake, power gel energizer, electrolite mix, almonds wasabi, crackers And hummus	Bottled water				Sports energy drink (e.g. Gatorade)						Good										2+ hours	Running	Challenging				2300
2017-03-07 09:53:00	2017-03-07 09:59:00	152	1006	8292016	2016-08-29	600	Protein Bar, Yogurt		All of it	Roasted Garlic Chicken, Tomato And Basil Chicken Sausages		All of it	Chicken Linguini		All of it	Nutella, crackers, almonds wasabi, tomato and basil chicken sausages	Bottled water				Sports energy drink (e.g. Gatorade)						Good																2300
2017-03-07 09:55:00	2017-03-07 09:59:00	132	1006	8302016	2016-08-30	600	Protein Bar, Chocolate Pudding, Peanut Butter, Crackers		All of it	Steak And Cheese Sandwich, Hatch Green Chili Smoked Shortly Sausages		All of it				Protein bar	Bottled water				Sports energy drink (e.g. Gatorade)						Good										Less than 30 mins	Running	Easy				2300
2017-03-07 09:58:00	2017-03-07 09:59:00	169	1006	8312016	2016-08-31	600	Protein Bar, Crackers, Nutella,		All of it	Tempura Carrots, Brussel Sprouts, Breaded Chicken Wings, Ranch Dressing, Watermelon		All of it	Meatball And Saisage Marinara, Lentil Crackers And Red Pepper Hummus		All of it	Protein shake	Bottled water				Sports energy drink (e.g. Gatorade)						Good										30 mins to 1 hour	Running	Moderate				2300
2017-03-07 10:03:00	2017-03-07 10:03:00	214	1006	9012016	2016-09-01	600	Protein Bar, Crackers, Nutella, Banana		All of it	Steak And Cheese Sandwich		All of it	Meatballs And Mozz Sandwich, Ranch Dressing		All of it	Power gel wnergizer, protein bar, protein shake, electrolyte mix, hatch green chili shorty sausages, crackers, reeses chocolates	Bottled water				Sports energy drink (e.g. Gatorade)			Fruit juice		Beer, wine, or spirits	Good										2+ hours	Running	Moderate				2300
2017-03-07 10:05:00	2017-03-07 10:05:00	102	1006	9032016	2016-09-03	900	Crackers And Nutella		All of it	Pepperoni Pizza 3 Slices, Ranch Dressing, Bbq Sausages,							Bottled water					Coffee or tea					Good																2300
2017-03-07 10:08:00	2017-03-07 10:08:00	182	1006	9062016	2016-09-06	600	Protein Bar, Greek Yogurt		All of it	Roast Beef, Steamed Carrots, Corn Can, Fried Popcorn Shrimp, Guacamole, Tortilla Chips		All of it	Grilled Pork Chop, White Rice, Steamed Carrots, Green Beans, Steam Freah Corn		All of it	Protein shake	Bottled water				Sports energy drink (e.g. Gatorade)					Beer, wine, or spirits	Good										1 to 2 hours	Strength training	Challenging				2300
2017-03-07 10:11:00	2017-03-07 10:11:00	187	1006	9072016	2016-09-07	600	Nutella And Crackers, Banana		All of it	Pepperoni Pizza 2 Slices, Ranch Dressing, Salted Caramel Almonds, Bbq Sausages,		All of it	Tuna And Crackers		All of it	Power gel energizer, protein shake, chipotle peanuts, protein bar	Bottled water				Sports energy drink (e.g. Gatorade)			Fruit juice		Beer, wine, or spirits	Good										30 mins to 1 hour	Running	Moderate				2300
2017-03-07 10:19:00	2017-03-07 10:19:00	515	1006	9082016	2016-09-08	600	Banana, Nutella And Crackers, Peanut Butter		All of it	Roast Beef, Potato Wedges, Brussel Sprouts		All of it	Guacamole, Tortilla Chips, Steamed Cauliflower, Steam Fresh Corn, Green Beans, Steamed Carrots, Breaded Chicken Wings, Ceasar Dressing		All of it	Bbq sausages	Bottled water				Sports energy drink (e.g. Gatorade)					Beer, wine, or spirits	Good										Less than 30 mins	Running	Moderate				2300
2017-03-07 10:22:00	2017-03-07 10:22:00	164	1006	9092016	2016-09-09	600	Protein Bar, Yogurt		All of it	Vegetable Rice, Sweet And Sour Pork, Jalapeno Poppers, Ranch Dressing, Watermelon		All of it	Roasted Garlic Chicken, Protein Bar		All of it	Chipotle peanuts, crackers	Bottled water								Yogurt		Good																2300
2017-03-07 10:24:00	2017-03-07 10:24:00	133	1006	9102016	2016-09-10	600				Bratwurst, Red Bwans And Rice, Grilled Peppers And Onions, Cheese Sticks, Jalapeno Poppers, Ranch Dressing		All of it				Chipotle peanuts	Bottled water										Good																2300
2017-03-07 10:28:00	2017-03-07 10:28:00	196	1006	9112016	2016-09-11	600	Protein Bar, Nutella And Crackers, Banana		All of it	Honeycrisp Apple, Hot Peanuts, Almonds Wasabi, Beef Steak Strips		All of it	Pepperoni Pizza 2 Slices, Ranch Dressing		All of it	Power gel energizer, protein shake, lentil crackers and hummus, chocolate chip cookie sandwich	Bottled water				Sports energy drink (e.g. Gatorade)						Good										2+ hours	Running	Challenging				2300
2017-03-07 10:31:00	2017-03-07 10:31:00	216	1006	9122016	2016-09-12	600	Protein Bar And Greek Yogurt		All of it	Breaded Chicken Wings, Gratin Potatoes, Fried Tempura Cauliflower, Chili Cheese Nachos		All of it	Ranch Dressing, Italian Style Meatballs And Mozzarella Sandwich		All of it	Peanut butter, banana, protein shake, almonds wasabi, crackers	Bottled water				Sports energy drink (e.g. Gatorade)				Yogurt	Beer, wine, or spirits	Good										2+ hours	Running, strength training	Very Challenging				2300
2017-03-07 10:34:00	2017-03-07 10:34:00	188	1006	9132016	2016-09-13	900	Protein Bar, Yogurt		All of it	Pork Ribs, Red Beans And Rice, Raw Cauliflower, Guacamole And Tortilla Chips		All of it	Steak And Cheese Sandwich		All of it	Protein shake, almonds wasabi	Bottled water										Good										30 mins to 1 hour	Strength training	Moderate				2300
2017-03-07 10:38:00	2017-03-07 10:38:00	197	1006	9142016	2016-09-14	600	Banana, Nutella And Crackers		All of it	Corned Beef, Fried Shrimp, Steamed Carrots, Potato		All of it	Pepperoni Pizza 2 Slices, Ranch Dressing, Almonds Wasabi		All of it	Protein shake, honey waffle, potato chips,	Bottled water				Sports energy drink (e.g. Gatorade)						Good										1 to 2 hours	Running	Challenging				2300
2017-03-07 10:41:00	2017-03-07 10:42:00	227	1006	9152016	2016-09-15	600	Corned Beef Hash, Scrambled Egg Whites, Mushrooms, Ham, Cheddar, Chunky Salsa, Watermelon, Papaya		All of it	Yuca, Corn Can, Steamed Carrots, Flour Tortilla, Grilled Chicken, Flour Tortilla, Salsa, Guacamole, Tortilla Chips, Fried Plaintain		All of it	Power Gel Energizer		All of it		Bottled water				Sports energy drink (e.g. Gatorade)						Good										30 mins to 1 hour	Running	Challenging				2300
2017-03-07 10:44:00	2017-03-07 10:44:00	132	1006	9172016	2016-09-17	1000				Large Pan Supreme Pizza 3 Slices		All of it				Power gel energizer, protein shake	Bottled water				Sports energy drink (e.g. Gatorade)					Beer, wine, or spirits	Good										2+ hours	Running	Challenging				2300
2017-03-07 10:48:00	2017-03-07 10:48:00	236	1006	9192016	2016-09-19	900	Crackers And Nutella, Yogurt		All of it	Chicken Cordon Bleu, Cheese Sticks, Grilled Potatoes, Steamed Carrots, French Green Beans		All of it	Fried Catfish, Red Beans And Rice, Steamed Carrots		All of it	Protein shake	Bottled water				Sports energy drink (e.g. Gatorade)				Yogurt		Good										30 mins to 1 hour	Running	Moderate				2300
2017-03-07 10:51:00	2017-03-07 10:52:00	235	1006	9202016	2016-09-20	530	Scrambled Egg Whites, Chunky Salsa, Watermelon And Pineapple		All of it	Grilled Salmon Steaks, Fried Shrimp, Vegetable Fried Rice, Creamed Asparagus		All of it	1 Hamburger With Cheese		All of it	Protein shake	Bottled water										Good										1 to 2 hours	Strength training	Moderate				2300
2017-03-07 10:54:00	2017-03-07 10:54:00	177	1006	9212016	2016-09-21	600	Greek Yogurt, Kiwi, Protein Bar		All of it	Beunswick Stew, White Rice, Peas And Carrots		All of it	Corn Beef, Green Beans, Stewed Tomatoes, Jalapeno Poppers, Ranch Dressing		All of it	Honey waffle, protein shake, almonds wasabi, protein bar	Bottled water				Sports energy drink (e.g. Gatorade)				Yogurt	Beer, wine, or spirits	Good										30 mins to 1 hour	Running	Moderate				2300
2017-03-07 10:57:00	2017-03-07 10:57:00	158	1006	9222016	2016-09-22	600	Greek Yogurt, Banana And Nutella		All of it	Baked Catfish, Cooked Asparagus, Tempura Fried Cauliflower, Guacamole And Tortilla Chips		All of it	Meatball And Sausage Marinara		All of it	Chile lime peanuts, pear	Bottled water							Fruit juice	Yogurt		Good																2300
2017-03-07 10:59:00	2017-03-07 10:59:00	137	1006	9232016	2016-09-23	600	Protein Bar, Banana And Nutella		All of it	Potato Wedges, Sausage, Grilled Peppers And Onions, Chocolate Cake, Ice Cream Soft Serve		All of it				Power gel energizer	Bottled water										Good										1 to 2 hours	Running	Challenging				2300
2017-03-07 11:04:00	2017-03-07 11:04:00	217	1006	11012016	2016-11-01	600	Greek Yogurt, Protein Bar		All of it	Hamburger With Chili, Steamed Broccoli, Steamed Carrots, Guacamole And Tortilla Chips		All of it	Spicy Red Hot Beef And Bean Burrito, Smoked Sausages		All of it	Protein shake, beef and elk jerky, crackers	Bottled water				Sports energy drink (e.g. Gatorade)				Yogurt	Beer, wine, or spirits	Good										1 to 2 hours	Strength training	Challenging				15
2017-03-07 11:06:00	2017-03-07 11:06:00	160	1006	11022016	2016-11-02	600	Crackers And Nutella, Banana, Protein Bar		All of it	Roast Pork Loin, Red Beans And Rice, Steamed Carrots		All of it	Chicken Tetrazini, Rice Pilaf, Squash And Zucchini, Cooked Asparagus		All of it		Bottled water										Good																2300
2017-03-07 11:09:00	2017-03-07 11:09:00	171	1006	11032016	2016-11-03	600	Protein Bar, Crackers And Nutella		All of it	Meatball Mozzarella Sandwich, Buffalo Chicken Stick Jerky		All of it	Seasoned Beef Strips, Fried Breaded Shrimp, Zucchini, Steak Sauce		All of it	Protein shake	Bottled water										Good										1 to 2 hours	Strength training	Challenging				2300
2017-03-07 11:14:00	2017-03-07 11:14:00	273	1006	11042016	2016-11-04	600	Banana, Nutella, Protein Bar		All of it	Lasagna With Meat And Sauce, Garlic Bread, Garden Salad, Raspberry Vinagrette		All of it	Buffalo Chicken With Ranch And Provolone Cheese		All of it	Protein shake, chile lime peanuts, smoked sausages,	Bottled water				Sports energy drink (e.g. Gatorade)					Beer, wine, or spirits	Good										1 to 2 hours	Strength training	Moderate				2300
2017-03-07 11:17:00	2017-03-07 11:17:00	202	1006	11052016	2016-11-05	1000			All of it	Buffalo Chicken With Ranch And Provolone Cheese Sandwich		All of it	Hamburger, Tortilla Chips And Salsa		All of it	Protein shake, chocolate chip cookie, nutella, beef steak with cranberry and sirracha	Bottled water				Sports energy drink (e.g. Gatorade)					Beer, wine, or spirits	Good										1 to 2 hours	Running and strength training	Challenging				2300
2016-03-17 20:29:00	2016-03-19 22:46:00	94101	1007	16032016	2016-03-16	520	Egg Whites Bacon And A Biscit		3/4 of it	Turkey And Sweet Potatos With A Small Salad		All of it	2 Grilled Chicken Brasts And A Salad		All of it		Bottled water						Milk				Very Ill										1 to 2 hours	Cardio and weights	Very Challenging	2019-05-03	1	Hard and formed (like a cigar)	2230
2016-03-19 22:43:00	2016-03-19 22:46:00	111	1007	18032916	2016-03-18	530	Bacon Egg Whites And A Waffel		All of it	Chicken Wrap		All of it	2 Chicken Brests		All of it		Bottled water						Milk			Beer, wine, or spirits	Good										30 mins to 1 hour		Moderate	2019-05-03	1	Soft and formed (like peanut butter)	300
2016-03-19 22:41:00	2016-03-19 22:46:00	126	1007	18032016	2016-03-17	530	Bacon Egg Whites Snd Biscut		3/4 of it	Turkey And Sweet Patatos		All of it	Chicken Wrap And Salad		All of it		Bottled water						Milk				Good										1 to 2 hours	Weights	Challenging	2019-05-03	2	Loose and unformed (like a thick milkshake)	2300
2016-03-19 22:45:00	2016-03-19 22:46:00	131	1007	19032016	2016-03-19	1045	None			Banana With Penutbutter		All of it	Cheese Burger Patatos And Jalapeno Popers		All of it		Bottled water				Sports energy drink (e.g. Gatorade)						Ill													2019-05-03	0		2230
2016-03-21 09:29:00	2016-03-21 09:29:00	161	1007	20032016	2016-03-20	930	Pancakes And One Egg		All of it	Protein Bar		All of it	Turkey Bites And Choped Chicken With Cheese And Cottage Cheese With Sunflower Seeds		All of it		Bottled water									Beer, wine, or spirits	Good										Less than 30 mins	Swim	Easy	2019-05-03	0		2245
2016-03-30 23:46:00	2016-03-30 23:46:00	220	1007	20032016	2016-03-28	530	Biscuit A Sasuage Like And Scrambled Eggs And A Bowl Of Oat Meal		3/4 of it	Chopped Chicken Wrap And A Bowl Of Salad		All of it	2 Chicken Breasts A Bowl Of Salad And Japalino Poppers		3/4 of it		Bottled water						Milk			Beer, wine, or spirits	Good									Doxycycline	30 mins to 1 hour	Running	Challenging	2019-05-03	0		2200
2016-03-22 00:56:00	2016-03-23 00:52:00	185	1007	21032016	2016-03-21	520	Bacon Egg Whites And A Bisket And Oatmeal		All of it	Chicken Wrap With Bacon And A Bowl Of Cottage Cheese		3/4 of it	2 Chicken Breast With A Salad		All of it	Banana	Bottled water						Milk				Good									Doxicycline	1 to 2 hours	Weights and a run	Challenging	2019-05-03	1	Hard and formed (like a cigar)	2300
2016-03-23 00:52:00	2016-03-23 00:52:00	86200	1007	22032016	2016-03-22	530	Protien Bar		All of it	Chucken Wrap And A Bowl Of Soup		3/4 of it	2 Chicken Breast And A Salad		All of it	Swiss roll	Bottled water						Milk				Good									Doxycycline	1 to 2 hours	Lifted weights	Challenging	2019-09-06	2	Hard and formed (like a cigar)	2300
2016-03-24 00:16:00	2016-03-25 02:04:00	84214	1007	23032016	2016-03-23	530	Oatmeal And Watermellon		All of it	Baked Turkey Sweet Potatos And Cottage Cheese		All of it	2 Grilled Chicken Breast Cole Slaw And Cottage Cheese		All of it	Snack cake	Bottled water						Milk				Good									Doxycyclne	Less than 30 mins	Cardio		2019-09-06	2	Hard and formed (like a cigar)	2230
2016-03-25 02:04:00	2016-03-25 02:04:00	92858	1007	24032016	2016-03-24	530	Eggs Bacon And Biskit		3/4 of it	Grilled Chicken Mac And Cheese And Cottage Cheese		3/4 of it	Protein Bar And Snack Cake		All of it		Bottled water				Sports energy drink (e.g. Gatorade)		Milk			Beer, wine, or spirits	Good									Doxcycline	30 mins to 1 hour	Weights	Challenging	2019-09-06	2	Hard and formed (like a cigar)	0
2016-03-27 15:40:00	2016-03-27 15:40:00	221807	1007	25032016	2016-03-25	1000	Nothing			Choped Chicken Wrap And a Bowl Of Bottage Cheese		3/4 of it	Nothing					Base purified water								Beer, wine, or spirits	Good									Doxycyvline	Less than 30 mins	Walking	Easy	2019-09-06	1	Hard and formed (like a cigar)	300
2016-03-27 15:44:00	2016-03-27 15:44:00	191	1007	26032016	2016-03-26	1130	Nothing			Protein Bar		All of it	Bbq Ribs Green Beans Bacon Cheese Burger		All of it		Bottled water									Beer, wine, or spirits	Good									Doxycyclne	Less than 30 mins	Walking	Easy	2019-09-06	1	Hard and formed (like a cigar)	2330
2016-03-27 23:28:00	2016-03-27 23:28:00	27840	1007	27032016	2016-03-27	530	Jelly Donut		All of it	Crab Legs Bowl Of Salad And Watermellon		All of it	Bbq Pork Chop Grilled Potatos And Asperigas		All of it	Snack cake	Bottled water									Beer, wine, or spirits	Good									Doxcycline	Less than 30 mins	Walking	Easy	2019-05-03	1	Loose and unformed (like a thick milkshake)	2130
2016-03-30 23:42:00	2016-03-30 23:42:00	170690	1007	29032016	2016-03-29	530	2 Hard Boiled Eggs A Biscuit And Turkey Sasuage. Anf A Bowl Of Oat Meal		3/4 of it	Chopped Chicken Wrap And Bowl Of Salad		All of it	Chopped Chicken Wrap Abd Bowl Of Salad And Some Watermellon		3/4 of it		Bottled water						Milk				Good									Doxycyclilne	1 to 2 hours	Weights and carido	Challenging	2019-05-03	0		2245
2016-04-02 18:07:00	2016-04-02 18:07:00	190	1007	31032016	2016-03-31	530	Bacon Eggs And A Bowl Of Oat Meal		3/4 of it	Chopped Chicken Wrap Amd A Salad		All of it	Grilled Chicken Breast And Bowl Of Salad		3/4 of it			Base purified water					Milk				Good									Doxycyclne	1 to 2 hours	Weights and cardio	Challenging	2019-05-03	1	Soft and formed (like peanut butter)	2245
2016-04-02 18:12:00	2016-04-02 18:12:00	276	1007	1042016	2016-04-01	530	Bacon Eggs A Biscuit And Bowl Or Oat Meal		3/4 of it	Chopped Chicken Wrap Whit A Bowl Of Salad		All of it	Grilled Chicken And Rice		3/4 of it	Protein bar	Bottled water						Milk			Beer, wine, or spirits	Good									Doxycyclne	30 mins to 1 hour	Running		2019-05-03	2	Hard and formed (like a cigar)	2330
2016-04-03 22:50:00	2016-04-03 22:50:00	103076	1007	2042016	2016-04-02	1100	None			Chopped Chicken Wrap And Salad		3/4 of it	Hot Pockets		All of it		Bottled water									Beer, wine, or spirits	Good									Doxycycline	30 mins to 1 hour	Weights	Challenging	2019-05-03	0		2330
2016-04-03 22:52:00	2016-04-03 22:52:00	142	1007	3042016	2016-04-03	730	Pancakes Sasuage And Watermellon		All of it	Chips Ans Salsa		3/4 of it	Bbq Ribs And Pork And Yogart		All of it		Bottled water								Yogurt	Beer, wine, or spirits	Good									Doxycycline	Less than 30 mins	Softball	Easy	2019-05-03	2	Soft and formed (like peanut butter)	2130
2016-04-05 01:11:00	2016-04-05 01:11:00	94738	1007	4042016	2016-04-04	530	Bacon Scrambled Eggs Oatmeal Hash Brown		3/4 of it	Chopped Chicken Wrap And Bowl Of Cottage Cheese		3/4 of it	BLT Cottage Cheese And Ice Cream		All of it		Bottled water						Milk			Beer, wine, or spirits	Good									Doxycycline	1 to 2 hours	Weights and ran	Challenging	2019-09-06	2	Loose and unformed (like a thick milkshake)	2330
2016-04-06 00:07:00	2016-04-06 00:07:00	82569	1007	5042016	2016-04-05	530	Sasuage Scrambles Eggs Hash Brown And A Biskit And Oatmeal		3/4 of it	Lobster Tail. Steak And Cottage Cheese		All of it	Chopped Chicken Wrap And Taco Soup Watermellon		1/2 of it		Bottled water						Milk				Good									Doxycycline	1 to 2 hours	Weights and tobata	Challenging	2019-09-06	0		2230
2016-04-06 23:16:00	2016-04-06 23:16:00	83296	1007	6042016	2016-04-06	530	Bacon Sasuage 3 Eggs And Oatmeal		3/4 of it	2 BLT Sandwiches Ans Cottage Cheese		All of it	Chopped Chickrn Wrap 1 Shickeb Strip And Cottage Chrese		All of it		Bottled water				Sports energy drink (e.g. Gatorade)		Milk			Beer, wine, or spirits	Good									Doxycycline	30 mins to 1 hour	Running		2019-09-06	0		2130
2016-04-11 00:37:00	2016-04-11 00:37:00	196	1007	6042016	2016-04-09	1100	Nothing			Microwave Noodles And A Banana		All of it	Beef And Bean Barito Tuna Sandwich And Ice Cream		3/4 of it		Bottled water										Good									Doxy	Less than 30 mins	Walking	Easy	2019-05-03	1	Soft and formed (like peanut butter)	2200
2016-04-07 23:09:00	2016-04-07 23:09:00	85977	1007	7042016	2016-04-07	530	Bacon Eggs Oatmeal And Toast		3/4 of it	2 BLT's And Cottage Cheese		All of it	Spagiti With Meat Sauce Garlic Bread And Lima Beans		All of it	Banana		Base purified water					Milk			Beer, wine, or spirits	Good									Doxy	30 mins to 1 hour	Circuit training		2019-09-06	1	Hard and formed (like a cigar)	2130
2016-04-11 00:34:00	2016-04-11 00:34:00	264295	1007	8042016	2016-04-08	530	Protein Bar		All of it	Chopped Chicken Wrap And Cottage Cheese		All of it	Chopped Chicken And A Salad		3/4 of it	Banana	Bottled water						Milk			Beer, wine, or spirits	Good									Doxycycline	1 to 2 hours	Weights	Challenging	2019-05-03	0		230
2016-04-11 00:39:00	2016-04-11 00:39:00	127	1007	10042016	2016-04-10	945	Pancakes		All of it	Chopped Chicken And Sweet Patoes And A Salad		3/4 of it	Bbq Ribs And Chicken Wings		3/4 of it	Chips	Bottled water									Beer, wine, or spirits	Good									Doxycycline			Easy	2019-05-03	1	Hard and formed (like a cigar)	2230
2016-04-12 00:38:00	2016-04-12 00:38:00	86340	1007	11042016	2016-04-11	530	Protein Shake And Banana		All of it	Chopped Chicken Wrap And Pickles Ans Watermellon		All of it	2 Tuna Sandwiches Pickles A Salad And Watermellon		3/4 of it	Banana	Bottled water						Milk				Good									Doxy	1 to 2 hours	Weights and walikin	Very Challenging	2019-05-03	1	Soft and formed (like peanut butter)	2245
2016-04-13 00:04:00	2016-04-13 00:04:00	84382	1007	12042016	2016-04-12	530	Protein Shake 2 Hard Boiled Eggs A Biscut Bacon And A Bowl Of Oat Meal		3/4 of it	Blt Sandwich Cottage Cheese And Tortila Soup		All of it	Turckey Nuggets Chopped Chicken Salad		All of it	Banana	Bottled water						Milk				Good									Doxy	1 to 2 hours	Weights	Challenging	2019-05-03	2	Soft and formed (like peanut butter)	2230
2016-04-13 23:38:00	2016-04-13 23:38:00	84826	1007	13042016	2016-04-13	530	Protein Shake Yogurt		All of it	Chopped Chicken Wrap And Cottage Cheese		All of it	2 BLT Sandwiches Cottage Cheese And A Carrot		All of it		Bottled water						Milk		Yogurt		Good									Doxy	Less than 30 mins	Walking	Easy	2019-09-06	2	Soft and formed (like peanut butter)	2200
2016-04-14 23:42:00	2016-04-14 23:42:00	86639	1007	14042016	2016-04-14	530	Protein Shake And A Banana		All of it	Chopped Chicken Wrap, Cottage Cheese And 2 Kiwis		All of it	Yoguart And Crackers		All of it		Bottled water								Yogurt		Good									Doxy,keflex	Less than 30 mins	Walking	Easy	2019-05-03	1	Hard and formed (like a cigar)	2200
2016-04-19 23:46:00	2016-04-19 23:46:00	432214	1007	15042016	2016-04-15	530	Protein Shake		All of it	Chopped Chicken Wrap And A Bowl Of Soup		3/4 of it	Blt Bowl Of Cottage Cheese And Watermellon		All of it		Bottled water								Yogurt	Beer, wine, or spirits	Good									Doxy	30 mins to 1 hour	Weights	Challenging	2019-09-06	1	Hard and formed (like a cigar)	200
2016-04-19 23:48:00	2016-04-19 23:48:00	136	1007	16042016	2016-04-16	1030	None			Chinese Noodles And Yogert		All of it	Chopped Chicken Wrap Cole Slaw And Cottage Cheese		All of it	Chips		Base purified water							Yogurt	Beer, wine, or spirits	Good										Less than 30 mins	Walikng	Easy	2019-05-03	0		2300
2016-04-19 23:50:00	2016-04-19 23:50:00	141	1007	17042016	2016-04-17	930	Pancakes		All of it	Protein Shake		All of it	2 Blt's Cottage Cheese And Watermellon		All of it		Bottled water									Beer, wine, or spirits	Good									Doxy	Less than 30 mins	Walking	Easy	2019-05-03	0		2330
2016-04-19 23:52:00	2016-04-19 23:52:00	124	1007	18042016	2016-04-18	530	Protein Shake		All of it	Chopped Chicken Wrap And A Salad		All of it	Blt Cotrage Cheese And Watermellon		All of it		Bottled water										Good									Doxy	1 to 2 hours	Weights	Challenging	2019-09-06	1	Hard and formed (like a cigar)	2230
2016-04-19 23:55:00	2016-04-19 23:55:00	154	1007	19042016	2016-04-19	530	Protein Shake		All of it	2 Blt's Cottage Cheese And Carrots		All of it	Bakes Fish Corn On The Cob And Peas		All of it		Bottled water										Good									Doxy	1 to 2 hours	Weights		2019-09-06	2	Soft and formed (like peanut butter)	2230
2016-04-20 23:47:00	2016-04-20 23:47:00	85893	1007	20042016	2016-04-20	500	Protein Shake		All of it	Chopped Chicken And Bacon Wrap And Cottage Cheese		All of it	Turkey And A Polish Sasuage, Cottage Cheese And Mixed Veggies, And A Bowl Of Ice Cream		All of it		Bottled water									Beer, wine, or spirits	Good									Doxy	Less than 30 mins	Walking	Easy	2019-09-06	0		2200
2016-04-26 00:05:00	2016-04-26 00:05:00	219	1007	23042016	2016-04-23	930	Protein Shake		All of it	2 Blt's Chttage Cheese And Olives		All of it	Chopped Chicken Wrap Chooage Cheese And Watermellon		3/4 of it		Bottled water			Soda						Beer, wine, or spirits	Good									Doxy	30 mins to 1 hour	Weights	Challenging	2019-09-06	3	Loose and unformed (like a thick milkshake)	0
2016-04-26 00:07:00	2016-04-26 00:07:00	126	1007	24042016	2016-04-24	900	Pancakes And One Fried Egg		All of it	Protein Shake		All of it	Chopped Chicken Corn And Cottage Cheese		All of it	Chips		Base purified water							Yogurt	Beer, wine, or spirits	Good									Doxy	Less than 30 mins	Walking	Easy	2019-05-03	0		2230
2016-04-26 00:10:00	2016-04-26 00:10:00	182	1007	25042016	2016-04-25	530	Protein Shake And Banana		All of it	Chopped Chicken Wrap Cottage Cheese And Olives And Watermellon		All of it	2 Blt's Cottage Cheese		All of it		Bottled water				Sports energy drink (e.g. Gatorade)						Good									Doxy	1 to 2 hours	Weights	Very Challenging	2019-09-06	1	Soft and formed (like peanut butter)	2230
2016-04-27 23:59:00	2016-06-13 18:35:00	172155	1007	26042016	2016-04-26	530	Protein Shake And Banana		All of it	Chopped Chicken Wrap With Bacon, Cottage Cheese And Watermellon		3/4 of it	Chicken Enchlida And A Chopped Chicken Wrap With Cottage Cheese		3/4 of it		Bottled water						Milk				Good									Doxy	1 to 2 hours	Weights	Challenging	2019-09-06	1	Hard and formed (like a cigar)	2330
2016-05-03 00:26:00	2016-05-03 00:26:00	170	1007	29042016	2016-04-29	530	Protein Shake And A Banana		All of it	Chopped Chicken Wrap With Cottage Cheese		3/4 of it	Pork Roast And Rice And Cottage Cheese And Watermellon		All of it		Bottled water									Beer, wine, or spirits	Good									Doxy	30 mins to 1 hour	Light weights	Moderate	2019-05-03	0		2230
2016-05-03 00:29:00	2016-05-03 00:29:00	189	1007	30042016	2016-04-30	530	Eggs And Bacon And Some Oatmeal		3/4 of it	Protein Bar And 2 Blts And Sime Cottage Cheese		All of it	Chopped Chicken Cottage Cheese And Mixed Veggies		All of it	Granola bar	Bottled water						Milk			Beer, wine, or spirits	Good									Doxy	2+ hours	Hiking	Challenging	2019-05-03	0		2130
2016-05-03 00:32:00	2016-05-03 00:32:00	182	1007	1052016	2016-05-01	1000	Pancakes 2 Fried Eggs		All of it	Chips And Salsa		All of it	Chopped Chicken And Cottage Cheese With Spinich Leafs		All of it		Bottled water									Beer, wine, or spirits	Good									Doxy	Less than 30 mins	Walking	Easy	2019-05-03	0		2230
2016-05-03 00:34:00	2016-05-03 00:34:00	117	1007	2052016	2016-05-02	530	Protein Shake And A Banana		All of it	Chopped Chicken Salad And Cottage Cheese		All of it	Chopped Chicken Wrap And Cheese Sticks		3/4 of it		Bottled water				Sports energy drink (e.g. Gatorade)					Beer, wine, or spirits	Good									Doxy	30 mins to 1 hour	Running	Moderate	2019-09-06	2	Soft and formed (like peanut butter)	2230
2016-05-08 23:45:00	2016-05-10 01:31:00	177	1007	3052016	2016-05-03	530	Protein Shake		All of it	Turkey And Rice Watermellon		All of it	Chopped Chicken Wrap With Cottage Cheese And Olives		3/4 of it		Bottled water				Sports energy drink (e.g. Gatorade)						Good									Doxy	1 to 2 hours	Weights	Very Challenging	2019-09-06	1	Soft and formed (like peanut butter)	2230
2016-05-08 23:50:00	2016-05-10 01:31:00	266	1007	4052016	2016-05-04	530	4 Eggs A Hashbrown And Bacon And Toast		All of it	2BLT's. Cottage Cheese And Olives		All of it	Chopped Chicken Wrap With Cottage Cheese And Watermellon		3/4 of it		Bottled water						Milk				Good									Doxy	1 to 2 hours			2019-05-03	0		2300
2016-05-08 23:54:00	2016-05-10 01:31:00	280	1007	5052016	2016-05-05	530	Protein Shake And A Banana		All of it	Pork Chop And Mixed Veggies		All of it	Chopped Chichen And Cottagr Cheese And WAtermellon		All of it		Bottled water										Good									Doxy	30 mins to 1 hour	Cardio	Challenging	2019-05-03	1	Hard and formed (like a cigar)	2200
2016-05-09 00:15:00	2016-05-10 01:31:00	1253	1007	6052016	2016-05-06	530	Protein Shake		All of it	Pork Chop Cottage Cheese Rice And Mixed Veggies		All of it	Chopped Chicken Wrap Cottage Cheese And Olives		3/4 of it	Gummy bears	Bottled water				Sports energy drink (e.g. Gatorade)						Good									Doxy	1 to 2 hours	Weights	Challenging	2019-09-06	0		2230
2016-05-09 00:28:00	2016-05-10 01:31:00	776	1007	7052016	2016-05-07	1000	Protein Shake		All of it	Chopped Chicken Wrap Cottage Cheese And Watermellon		All of it	2 BLT Sandwiches Cottage Cheese		All of it		Bottled water				Sports energy drink (e.g. Gatorade)					Beer, wine, or spirits	Good									Doxy	1 to 2 hours	Weights	Moderate	2019-09-06	0		300
2016-05-09 00:35:00	2016-05-10 01:31:00	428	1007	8052016	2016-05-08	1030	Protein Bar		3/4 of it	Turkey And Cheese Sandwich		All of it	Spicy Italian Sandwich And A Personal Pan Pizza		All of it	Crackers and cheese	Bottled water									Beer, wine, or spirits	Good									Doxy				2019-05-03	1	Loose and unformed (like a thick milkshake)	2245
2016-05-10 01:31:00	2016-05-10 01:31:00	89739	1007	9052016	2016-05-09	730	Protein Shake And A Banana		All of it	Beef Kabobs With Rice		All of it	Chopped Chicken Been And Beef Burito And Cottage Cheese And Watermellon		All of it	Reeses penutbutter cups	Bottled water							Fruit juice												Doxy	1 to 2 hours	Weights	Challenging	2019-09-06	3	Liquid (like water)	2330
2016-05-11 00:59:00	2016-05-11 00:59:00	84491	1007	10052016	2016-05-10	720	Protein Shake		All of it	Sweet Ans Sour Chicken With White Rice		1/2 of it	Spageti And Meat Sauce Cottage Cheese And Garlic Bread		All of it		Bottled water				Sports energy drink (e.g. Gatorade)		Milk				Good									Doxy	1 to 2 hours	Weights	Moderate	2019-09-06	0		2320
2016-05-15 22:26:00	2016-05-15 22:26:00	422784	1007	11052016	2016-05-11	530	Protein Shake		All of it	Grilled Prok Chop Mixed Veggies And Cottage Cheese		3/4 of it	Chopped Chicken Cottage Chrese And Watermellon		All of it		Bottled water				Sports energy drink (e.g. Gatorade)						Good									Doxy	1 to 2 hours	Weights	Challenging	2019-09-06	0		2245
2016-05-15 22:29:00	2016-05-15 22:29:00	197	1007	12052016	2016-05-12	530	Protein Shake Banana And Peanut Butter Crackers		All of it	1 Blt Cottage Cheese And Tortila Soup		3/4 of it	Corned Beef Mac And Cheese And Protein Shake		All of it		Bottled water				Sports energy drink (e.g. Gatorade)						Good									Doxy	1 to 2 hours	Weights and softball	Very Challenging	2019-09-06	2	Soft and formed (like peanut butter)	2300
2016-05-15 22:33:00	2016-05-15 22:33:00	204	1007	13052016	2016-05-13	530	Scrambled Eggs Hashbrown Bacon		All of it	Pork Chop And Mixed Veggies And Cottage Cheese		All of it	Chicken Enchlidas Cottage Cheese And Corn On The Cob		All of it		Bottled water						Milk			Beer, wine, or spirits	Good									Doxy	1 to 2 hours	Weights	Very Challenging	2019-05-03	1	Soft and formed (like peanut butter)	30
2016-05-15 22:37:00	2016-05-15 22:37:00	264	1007	14052016	2016-05-14	530	Eggs And Toast		All of it	3 Meat Pizza 4 Slices		All of it	Chicken Strips And Mashed Potatos		All of it	Reeses peanutbutter cups	Bottled water				Sports energy drink (e.g. Gatorade)		Milk				Good									Doxy				2019-09-06	2	Soft and formed (like peanut butter)	600
2016-05-15 22:40:00	2016-05-15 22:40:00	152	1007	15052016	2016-05-15	1400	Nothing			2 Pudding Snack Packs		All of it	Grilled Ribs, Hamburger And Sasuage Chips And Salsa		All of it		Bottled water									Beer, wine, or spirits	Good									Doxy				2019-05-03	1	Hard and formed (like a cigar)	2100
2016-05-22 00:48:00	2016-05-22 00:48:00	675	1007	16052016	2016-05-16	530	Protein Shake, Banana And Peanutbutter Crackers		All of it	Chicken Bacon Wrap, Jalapenos Poppers, Cottage Cheese And Watermellon		All of it	2 BLT's Cottagecheese Watermellon And Lima Beans		3/4 of it		Bottled water						Milk				Good									Doxy	1 to 2 hours	Weights	Challenging	2019-05-03	1	Soft and formed (like peanut butter)	2245
2016-05-22 00:56:00	2016-05-22 00:56:00	475	1007	17052016	2016-05-17	530	3 Fried Eggs Fried Plaintains And Toast		All of it	Chicken Strips Mashed Potatoes And Watermellon		All of it	Mac And Cheese Wirh Chopped Chicken Cooked Carrots And Watermellon		3/4 of it	Garnola bar	Bottled water						Milk				Good									Doxy	2+ hours	Weights	Very Challenging	2019-09-06	0		2230
2016-05-22 01:02:00	2016-05-22 01:02:00	336	1007	18052016	2016-05-18	530	Fried Eggs Bacon And Toast		All of it	2 BLT Sandwiches Carrots And Watermellon		All of it	Bbq Pork Chops Chicken Enchilada And Peas		All of it	Reeses peanut utter cups	Bottled water				Sports energy drink (e.g. Gatorade)		Milk			Beer, wine, or spirits	Good									Doxy	30 mins to 1 hour	Cardio		2019-09-06	2	Soft and formed (like peanut butter)	2200
2016-05-22 01:10:00	2016-05-22 01:10:00	502	1007	19052016	2016-05-19	530	Banana, Protein Shake And Peanutbutter Crackers		All of it	Steak, Corn On The Cob And Tortila Soup		All of it	Turkey Nuggets, Pork Loin, Mixed Veggies		All of it		Bottled water				Sports energy drink (e.g. Gatorade)		Milk				Good									Doxy	1 to 2 hours	Weights	Challenging	2019-05-03	0		2300
2016-05-22 01:15:00	2016-05-22 01:15:00	321	1007	20052016	2016-05-20	530	Banana, Portein Shake And Peanutbutter Crackers		All of it	Baked Turkey, Salad And Cottage Cheese		All of it	Baked Fish Mixed Veggies And Cottage Cheese		All of it												Good										1 to 2 hours	Weights	Challenging	2019-09-06	1	Soft and formed (like peanut butter)	100
2016-05-22 01:26:00	2016-05-22 01:27:00	661	1007	21052016	2016-05-21	930	Banana And Yogart		All of it	Fish Cottage Cheese And Watermellon		All of it	Subway Itilan Sandwich And Chips		3/4 of it		Bottled water									Beer, wine, or spirits	Good									Doxy				2019-05-03	1	Hard and formed (like a cigar)	0
2016-06-01 00:27:00	2016-06-01 00:27:00	163	1007	23052016	2016-05-23	530	Protein Shake And A Banana		All of it	Chopped Chicken Wrap. Cottage Cheese And Watermellon		All of it	Baked Turkey Mixed Vegies And Cottage Cheese		3/4 of it		Bottled water									Beer, wine, or spirits	Good									Doxy	30 mins to 1 hour	Cardio	Moderate	2019-09-06	1	Soft and formed (like peanut butter)	2320
2016-06-01 23:17:00	2016-06-05 22:59:00	82201	1007	24052016	2016-05-24	530	Bacon And Scrambled Eggs		All of it	Tortila Chips Chopped Chicken And Cottage. Cheese		3/4 of it	Beef Enchlida Cottage Cheese Watermellon And Peas		All of it		Bottled water						Milk		Yogurt												30 mins to 1 hour	Cardio	Moderate	2019-05-03	2	Hard and formed (like a cigar)	2330
2016-06-01 23:21:00	2016-06-05 22:59:00	246	1007	25052016	2016-05-25	500	Bacon Eggs And Toast		All of it	Baked Turkey And Mixed Veggies Cottage Cheese		All of it	Chopped Chicken Wrap Cottage Cheese And Olives		All of it		Bottled water						Milk			Beer, wine, or spirits	Good									Doxy	30 mins to 1 hour	Cardio	Moderate	2019-09-06	0		2300
2016-06-01 23:24:00	2016-06-05 22:59:00	166	1007	26052016	2016-05-26	530	Bacon Eggs And Toast		All of it	Tortila Chips Ribeye Steak Mixed Veggies And Cottage Chrese		All of it	Grilled Ham And Cheese Wrap Baked Beans		All of it		Bottled water						Milk		Yogurt		Good									Doxy	30 mins to 1 hour	Cardio	Moderate	2019-05-03	0		2230
2016-06-05 22:59:00	2016-06-05 22:59:00	344095	1007	27052016	2016-05-27	530	Protein Shake		All of it	Baked Turkey Corn Cottage Cheese And Watermellon		All of it	White Fish Mixed Veggies And Cottage Cheese		All of it		Bottled water										Good									Doxy	30 mins to 1 hour	Cardio	Moderate	2019-09-06	2	Soft and formed (like peanut butter)	2230
2016-06-05 23:01:00	2016-06-05 23:01:00	126	1007	29052016	2016-05-29	945	Nothing			Chopped Chicken Wrap Cottage Cheese And Salad		All of it	Grilled Pork Chop Cottage Cheese Mixed Veggies And Watermellon		All of it		Bottled water									Beer, wine, or spirits	Good									Doxy	Less than 30 mins			2019-05-03	1	Hard and formed (like a cigar)	100
2016-06-05 23:02:00	2016-06-05 23:02:00	97	1007	30052016	2016-05-30	1000	Nothing			Grilled Pork Chop Cottage Cheese And Yogart		All of it	Chicken Fajitas		All of it		Bottled water								Yogurt	Beer, wine, or spirits	Good									Doxy	Less than 30 mins		Easy	2019-09-06	0		130
2016-06-05 23:05:00	2016-06-05 23:05:00	155	1007	1062016	2016-06-01	530	Protein Shake		All of it	Chopped Chicken Cottage Cheese Ans Corn		All of it	Bbq Pork Chop Watermellon And Lima Beans		All of it		Bottled water										Good									Doxy	1 to 2 hours	Weights	Challenging	2019-09-06	1	Soft and formed (like peanut butter)	2230
2016-06-05 23:08:00	2016-06-05 23:08:00	162	1007	2062016	2016-06-02	530	Bacon Eggs And Toast		All of it	Jalapeno Popers Blt And Cottage Cheese		All of it	Chicken Cordon Blue And Mixed Veggies And Cottage Cheese		All of it		Bottled water						Milk													Doxy	1 to 2 hours	Weights	Challenging	2019-09-06	2	Soft and formed (like peanut butter)	2300
2016-06-13 19:27:00	2016-06-13 19:27:00	3075	1007	5062016	2016-06-05	945	Pancakes		All of it	Nothing		All of it	Bbq Ribs,chips And Salsa		All of it		Bottled water								Yogurt	Beer, wine, or spirits	Good									Doxy	Less than 30 mins	Walking	Easy	2019-09-06	2	Soft and formed (like peanut butter)	2330
2016-06-13 19:31:00	2016-06-13 19:31:00	251	1007	6062016	2016-06-06	530	Ham And Cheese Omlette Bacon And Hashbrown		All of it	Swiss Rolls And Wasabi Almonds		All of it	Jalapenos Poppers Bacon Wrapped Hamburger And Mixed Veggies		All of it		Bottled water						Milk				Good									Doxy	1 to 2 hours	Cardio and weights	Challenging	2019-09-06	1	Hard and formed (like a cigar)	2300
2016-06-13 19:34:00	2016-06-13 19:34:00	204	1007	7062016	2016-06-07	530	Protein Shake And Banana		All of it	Spaghetti And Meat Sauce And Cheese Sticks		All of it	Grilled Chicken Wrap		All of it		Bottled water										Good									Doxy	1 to 2 hours	Weights	Challenging	2019-05-03	0		2230
2016-07-09 19:28:00	2016-07-09 19:28:00	2246015	1007	8062016	2016-06-08	530	Meal Replacement Shake		All of it	Chopped Chicken Bacon Wrap Cottage Cheese And Watermellon		All of it	Chicken Strips And Mashed Potatos And Gravy		All of it		Bottled water						Milk													Doxy	1 to 2 hours	Weights	Challenging	2019-05-03	1	Soft and formed (like peanut butter)	2330
2016-07-09 19:36:00	2016-07-09 19:36:00	489	1007	9062016	2016-06-09	530	Mealreplacement Shake		All of it	Chicken Strips And Mashed Potatos And Gravy		All of it	Pork Chop And Chips And Guacamole And Cottage Cheese With Green Olives		3/4 of it		Bottled water										Good									Doxy	1 to 2 hours	Weights	Challenging	2019-09-06			2245
2016-07-09 19:43:00	2016-07-09 19:43:00	444	1007	13062016	2016-06-13	530	Protein Shake		All of it	Nothing			Choped Chicken Wrap Cottage Cheese And Watermellon		3/4 of it		Bottled water										Ill		Gastrointestinal issues							Doxy		None	Easy	2019-05-03	3	Loose and unformed (like a thick milkshake)	2200
2016-07-09 19:57:00	2016-07-09 19:57:00	835	1007	14062016	2016-06-14	530	Meal Replacement Shake Greek Yogurt Work Sweet And Salty Granola Bar		All of it	Lobster Tail Corn On The Cob Shrimp Cooked		All of it	Grilled Chicken Bacon Wrap Watermelon Salad Ranch Dressing		3/4 of it	Granola bar	Bottled water										Ill		Gastrointestinal issues							Doxy	30 mins to 1 hour	Weights	Very Challenging	2019-05-03	3	Soft and formed (like peanut butter)	2230
2016-07-09 20:00:00	2016-07-09 20:00:00	173	1007	15062016	2016-06-15	530	Raspberry Greek Yogurt		All of it	Chop Grilled Chicken Wrap Other Salsa And Refried Beans		All of it	Chopped Grilled Chicken Mac & Cheese And Peas And Cottage Cheese		All of it		Bottled water										Good									Doxy	1 to 2 hours	Weights	Challenging	2019-09-06	1	Hard and formed (like a cigar)	2330
2016-07-09 20:04:00	2016-07-09 20:04:00	220	1007	16062016	2016-06-16	530	Big Breakfast From Mcdonald's		All of it	Chicken Strips And Fries		All of it	Grilled Pork Chop Cause Cheese Green Olives Watermelon		All of it		Bottled water										Good									Doxy	1 to 2 hours	Weights	Challenging	2019-09-06	0		2230
2016-07-09 20:09:00	2016-07-09 20:09:00	292	1007	20062016	2016-06-20	530	Milk And Meal Replacement Shake		All of it	Nothing			Grilled Chicken Wrap, Cottage Cheese And Watermelon		All of it		Bottled water										Ill		Gastrointestinal issues							Doxy	Less than 30 mins	Carido	Moderate	2019-02-01	6+	Liquid (like water)	2230
2016-07-13 00:24:00	2016-07-13 00:24:00	274526	1007	21062016	2016-06-21	530	Meal Replacement Shake And Yogart		All of it	Chopped Chicken Wrap With Cottage Cheese And Chips With Guacamola		3/4 of it	Chicken Strips Mashed Potatoes And Gravy		All of it		Bottled water								Yogurt		Ill		Gastrointestinal issues			Runny or blocked nose				Doxy and a steroid	1 to 2 hours	Weights	Challenging	2019-05-03			2300
2016-07-13 00:26:00	2016-07-13 00:26:00	123	1007	22062016	2016-06-22	530	Protein Shake And Puding		All of it	Chicken Strips Mashed Taters And Gravy		All of it	Turkey Cutlet Next Vegetables Cottage Cheese And Olives		All of it		Bottled water			Soda							Good					Runny or blocked nose					1 to 2 hours	Weights	Challenging	2019-09-06	1	Soft and formed (like peanut butter)	2215
2016-07-13 00:28:00	2016-07-13 00:28:00	121	1007	23062016	2016-06-23	530	Meal Replacement Shake		All of it	Chicken Tacos Chips And Guacamole		All of it	Chicken Breasts Cottage Cheese Green Olives		3/4 of it		Bottled water				Sports energy drink (e.g. Gatorade)						Good					Runny or blocked nose				Doxy and a steroid	1 to 2 hours	Weights	Challenging	2019-05-03	0		2300
2016-07-13 00:30:00	2016-07-13 00:30:00	113	1007	24062016	2016-06-24	530	Meal Replacement Shake Yogart		All of it	Chicken Strips Mashed Peas And Gravy Corn		All of it	Spaghetti With Meat Sauce Cottage Cheese And Olives		All of it		Bottled water								Yogurt		Good									Doxy and a steroid	1 to 2 hours	Weights	Challenging	2019-09-06	2	Soft and formed (like peanut butter)	2330
2016-07-13 00:33:00	2016-07-13 00:33:00	136	1007	25062016	2016-06-25	1045	Nothing			Grilled Chicken Wrap With Bacon		All of it	Spicy Italian Sandwich Chips And Cheese		All of it	Chips and dip	Bottled water				Sports energy drink (e.g. Gatorade)				Yogurt		Good									Doxy and a steriid				2019-05-03	1	Hard and formed (like a cigar)	2345
2016-07-24 16:11:00	2016-07-24 16:11:00	84329	1007	7112016	2016-07-11	530	Protein Shake		All of it	Chopped Chicken Wrap Cottage Cheese Green Olives And Watermelon		All of it	Turkey Cutlet Mashed Potatoes And Gravy		3/4 of it		Bottled water										Good									Doxy	1 to 2 hours	Weights and running	Challenging	2019-09-06	2	Soft and formed (like peanut butter)	2300
2016-07-24 16:15:00	2016-07-24 16:15:00	297	1007	7122016	2016-07-12	530	Protein Shake And Greek Yogurt		All of it	Turkey Nuggets Mashed Potatoes And Gravy And Cottage Cheese And Green Olives		All of it	Beef And Bean Burrito Cottage Cheese And Watermelon		3/4 of it		Bottled water								Yogurt		Good									Doxy	1 to 2 hours	Weights	Challenging	2019-09-06	0		2330
2016-07-24 16:20:00	2016-07-24 16:20:00	284	1007	7132016	2016-07-13	530	Meal Replacement Shake		All of it	Barbecue Pork Chop Salad With Cottage Cheese And Green Olives Watermelon		3/4 of it	Chopped Chicken Wrap With Bacon		All of it		Bottled water										Good									Doxy	1 to 2 hours	Weights	Challenging	2019-05-03	1	Hard and formed (like a cigar)	2245
2016-07-24 16:24:00	2016-07-24 16:24:00	202	1007	7142016	2016-07-14	530	Protein Shake Blueberry Greek Yogurt		All of it	Lasagna Garlic Bread And Cottage Cheese		All of it	Grilled Pork Chop Mixed Vegetables Cottage Cheese And Watermelon		All of it	Banana	Bottled water			Soda					Yogurt		Good									Doxy	1 to 2 hours	Weights and cardio	Challenging	2019-09-06	0		2300
2016-07-24 16:30:00	2016-07-24 16:30:00	405	1007	7152016	2016-07-15	530	Protein Shake vanilla Putting		All of it	Pulled Pork Sandwich And French Fries		All of it	2 Peanut Butter And Jelly Sandwich		All of it		Bottled water			Soda							Good									Doxy	1 to 2 hours	Weights and cardio	Challenging	2019-05-03	2	Hard and formed (like a cigar)	2300
2016-07-24 16:36:00	2016-07-24 16:36:00	318	1007	7162016	2016-07-16	530	Bacon Three Eggs Biscuit Hashbrowns		All of it	Refried Beans Pork Sausage Pico De Gallo		All of it	Italian Sandwich		All of it		Bottled water									Beer, wine, or spirits	Good										30 mins to 1 hour	Running	Challenging	2019-05-03	0		2330
2016-07-24 16:40:00	2016-07-24 16:40:00	266	1007	7172016	2016-07-17	1000	Nothing			Chopped Chicken Wrap With Bacon Cottage Cheese Watermelon		All of it	Barbecue Pork Rib Hamburger		All of it		Bottled water									Beer, wine, or spirits	Good													2019-09-06	0		2300
2016-03-29 00:17:00	2016-03-29 00:17:00	256	1007	28032019	2019-03-28	530	Turkey Sasuage Biscuit And Two Hard Boiled Eggs, A Bowl Of Oat Meal		3/4 of it	1 Chicken Breast Lima Beans And A Bowl Of Salad		3/4 of it	Chopped Chicken Wrap With A Bowl Of Cottage Cheese		All of it	Resses peanut buttes cups	Bottled water						Milk				Good		Gastrointestinal issues							Doxycycline	1 to 2 hours	Weights and running	Challenging	2019-05-03	3	Liquid (like water)	2230
2016-03-03 20:14:00	2016-03-08 22:06:00	10906	1009	3032016	2016-03-03	500	Omeleta, Bacon		3/4 of it	Bbq Chicken Breast, Potatoes		3/4 of it	Chicken Fajita, Fries		3/4 of it	0		Base purified water						Fruit juice			Good									Doxcycoline	1 to 2 hours		Moderate	2019-05-03	1	Soft and formed (like peanut butter)	2200
2016-03-04 18:51:00	2016-03-08 22:06:00	208	1009	20160304	2016-03-04	500	Omelet Bacon		3/4 of it	Chicken Fajita		3/4 of it	Salmon, Mac And Cheese		3/4 of it	None		Base purified water						Fruit juice			Good									Doxycycline	1 to 2 hours	Cardio	Moderate	2019-09-06	1	Soft and formed (like peanut butter)	2200
2016-03-05 19:50:00	2016-03-08 22:06:00	89959	1009	20160305	2016-03-05	530	Omelet, Oatmeal, Bacon		3/4 of it	Salad, Chicken Breast, Madhed Potatoes		3/4 of it	Chicken Fajita, Salad		3/4 of it	None		Base purified water						Fruit juice		Beer, wine, or spirits	Good									Doxcycline	2+ hours	Chaplain hike	Challenging	2019-05-03	1	Soft and formed (like peanut butter)	2230
2016-03-06 21:26:00	2016-03-08 22:06:00	92129	1009	20160306	2016-03-06	1000	Oatmeal		All of it	Cheeseburger, Fries		3/4 of it	Pork Chop, Mashed Potatoes		3/4 of it	None		Base purified water		Soda				Fruit juice			Good									Doxycyline	1 to 2 hours		Moderate	2019-09-06	2	Loose and unformed (like a thick milkshake)	2230
2016-03-07 22:09:00	2016-03-08 22:06:00	89006	1009	20160307	2016-03-07	500	Ham Cheese Omelet, Bacon, Juice		All of it	Bbq Ribs, Mashed Potatoes, Water		3/4 of it	Grilled Cheese, Fries, Lemonade		3/4 of it	None		Base purified water						Fruit juice			Good									Doxycycline	1 to 2 hours	Basketball	Moderate	2019-09-06	0		2230
2016-03-08 22:06:00	2016-03-08 22:06:00	157	1009	20160308	2016-03-08	500	Ham Cheese Omelet, Hashbrown, Bacon		3/4 of it	Chicken Fajita		All of it	Cheeseburger And Fries		1/2 of it	None		Base purified water			Sports energy drink (e.g. Gatorade)			Fruit juice			Good									Doxycycline	30 mins to 1 hour	Basketball	Moderate	2019-05-03	1	Hard and formed (like a cigar)	2230
2016-03-09 22:02:00	2016-03-12 13:33:00	153	1009	20160309	2016-03-09	600	Yogurt		All of it	Cheeseburger, Fries		1/2 of it	Beef Stew, Salad		3/4 of it	None		Base purified water			Sports energy drink (e.g. Gatorade)			Fruit juice		Beer, wine, or spirits	Good									Doxycycline	30 mins to 1 hour		Easy	2019-05-03	1	Loose and unformed (like a thick milkshake)	2230
2016-03-10 22:54:00	2016-03-12 13:33:00	173	1009	20160310	2016-03-10	500	Scrambled Eggs, Bacon, Pancakes		3/4 of it	Lasagna, Rolls		1/2 of it	Chicken Fajita, Fries		3/4 of it	Power bar		Base purified water			Sports energy drink (e.g. Gatorade)			Fruit juice			Good									Doxycycline	1 to 2 hours	Basketball	Moderate	2019-05-03	1	Soft and formed (like peanut butter)	2230
2016-03-12 13:32:00	2016-03-12 13:33:00	141	1009	20160311	2016-03-11	520	Bacon, Omelet		3/4 of it	Chicken Fajita		All of it	Grilled Chicken, Fries		1/2 of it	None	Bottled water	Base purified water						Fruit juice		Beer, wine, or spirits	Good									Doxycycline	30 mins to 1 hour	Cardio	Challenging	2019-09-06	1	Hard and formed (like a cigar)	2330
2016-03-14 19:43:00	2016-03-14 19:43:00	142	1009	20160313	2016-03-13	800	Ham Cheese Omelet		All of it	Ham Cheese Sandwich		3/4 of it	Bbq Chicken And Chips		All of it	None		Base purified water						Fruit juice			Good									Doxycycline	30 mins to 1 hour	Cardio	Challenging	2019-09-06	1	Soft and formed (like peanut butter)	2300
2016-03-14 19:48:00	2016-03-14 19:48:00	299	1009	20160314	2016-03-14	500	Scrambled Eggs, Bacon, Hashbrown		3/4 of it	Bbq Chicken, Mashed Potatoes, Salad, Roll		1/2 of it	Chicken Fajita		3/4 of it	None		Base purified water						Fruit juice			Good									Doxcycline	30 mins to 1 hour	Gym	Moderate	2019-05-03	1	Hard and formed (like a cigar)	2230
2016-03-15 21:25:00	2016-04-27 09:30:00	92250	1009	20160315	2016-03-15	500	Ham Cheese Omelet, Bacon, Hash Brown		1/2 of it	Steak Fajita		3/4 of it	Chopped Steak, Fries, Salad		3/4 of it	None		Base purified water						Fruit juice			Good									Doxycycline	30 mins to 1 hour	Army PRT	Challenging	2019-09-06	1	Loose and unformed (like a thick milkshake)	2230
2016-03-17 21:58:00	2016-03-17 21:58:00	174	1009	20160317	2016-03-17	500	Ham And Omelet, Bacon, Hash Brown, Pancake		All of it	Italian BMT sandwich 6 Inch		All of it	Hamburger		All of it	None		Base purified water					Milk	Fruit juice			Good									Doxcycline	30 mins to 1 hour	5K	Very Challenging	2019-09-06	2	Hard and formed (like a cigar)	2300
2016-03-19 17:21:00	2016-03-19 17:21:00	153	1009	20160317	2016-03-19	500	Bacon Ham Cheese Omelet		3/4 of it	Grilled Chicken Breast, Fries		3/4 of it	Beef Stew And Rice		All of it	None		Base purified water			Sports energy drink (e.g. Gatorade)			Fruit juice			Good									Docycycline	30 mins to 1 hour	Sprints	Moderate	2019-09-06	2	Soft and formed (like peanut butter)	2330
2016-03-20 22:41:00	2016-04-27 09:30:00	110	1009	20160320	2016-03-20	1100	Cereal		1/2 of it	Ham Sandwich		3/4 of it	Turkey, Mashed Potatoes		All of it	None		Base purified water					Milk	Fruit juice			Good									Doxcycline	Less than 30 mins	Cardio	Moderate	2019-09-06	1	Hard and formed (like a cigar)	2230
2016-03-22 09:28:00	2016-03-22 09:28:00	138	1009	20160321	2016-03-21	500	Ham Cheese Omelet, Bacon		3/4 of it	Fried Shrimp, Mashed Potatoes		3/4 of it	Chicken Fajita		All of it	2 laffy taffy		Base purified water			Sports energy drink (e.g. Gatorade)		Milk	Fruit juice			Good									Doxycycline	30 mins to 1 hour	Stretches	Moderate	9+	2	Hard and formed (like a cigar)	2230
2016-03-22 22:15:00	2016-03-22 22:15:00	126	1009	20160322	2016-03-22	500	Scrambled Eggs, Biscuit, Bacon		All of it	Tuna Fish Sandwich		All of it	Steak, Fries		All of it	None		Base purified water			Sports energy drink (e.g. Gatorade)		Milk	Fruit juice			Good									Doxycycline	30 mins to 1 hour	Stretched	Easy	2019-09-06	2	Soft and formed (like peanut butter)	2230
2016-03-23 21:58:00	2016-03-23 21:58:00	148	1009	20160323	2016-03-23	500	Ham Cheese Omelet, Bacon		All of it	Turkey, Salad, Beans		All of it	Chicken Fajita		3/4 of it	None		Base purified water									Good									Doxycycline	Less than 30 mins	Stretched	Easy	9+	3	Soft and formed (like peanut butter)	2230
2016-03-25 11:42:00	2016-03-25 11:42:00	145	1009	20160324	2016-03-24	500	Scrambled Eggs, Bisuit, Bacon		3/4 of it	Chicken Fajita		All of it	Steak, Fries		All of it	None		Base purified water									Good									Doxycycline	1 to 2 hours	ARMY APFT	Challenging	9+	2	Soft and formed (like peanut butter)	2130
2016-03-27 16:17:00	2016-03-27 16:17:00	135	1009	20160326	2016-03-26	1000	Cereal		3/4 of it	Ham Sandwich, Chips		All of it	3 Slices Pizza		All of it	None		Base purified water						Fruit juice		Beer, wine, or spirits	Good									Doxycycline	30 mins to 1 hour	Abs	Easy	9+	1	Hard and formed (like a cigar)	2300
2016-03-28 00:18:00	2016-03-28 00:18:00	169	1009	20160327	2016-03-27	1000	Poptart		All of it	B.l.t. Sandwich, Chips		All of it	Pork Chop, Potatoe Salad		All of it	None		Base purified water						Fruit juice			Good									Doxycycline	1 to 2 hours	Basketball, softball	Moderate	9+	1	Soft and formed (like peanut butter)	2230
2016-03-28 23:25:00	2016-03-28 23:25:00	153	1009	20160328	2016-03-28	500	Ham Cheese Omelet, Biscuit, Hashbrown, Bacon		3/4 of it	Chopped Steak, Fries		3/4 of it	Subway Sandwich		All of it	None		Base purified water						Fruit juice			Good									Doxycycline	30 mins to 1 hour	2 mile run	Moderate	9+	1	Soft and formed (like peanut butter)	2200
2016-03-30 09:12:00	2016-03-30 09:12:00	170	1009	20160329	2016-03-29	500	Ham Cheese Omelet		3/4 of it	Roast Beef Mashed Potatoes		3/4 of it	Fried Chicken, Macaroni And Cheese		All of it	None		Base purified water						Fruit juice			Good									Doxycycline	30 mins to 1 hour	Muscle failure	Challenging	9+	1	Soft and formed (like peanut butter)	2230
2016-03-30 23:14:00	2016-03-30 23:14:00	166	1009	20160330	2016-03-30	500	Ham Cheese Omelet, Biscuit, Hash Brown		All of it	Beef Fajitas		All of it	Chopped Steak, Fries		All of it	Slice chocolate cake		Base purified water					Milk	Fruit juice			Good									Doxycycline	30 mins to 1 hour	Muscle failure	Challenging	9+	3	Soft and formed (like peanut butter)	2230
2016-04-03 15:48:00	2016-04-03 15:48:00	137	1009	20160402	2016-04-02	1000	Cereal		All of it	Ham Sandwich, Chips		All of it	White Castle Cheese Burgers		All of it	None		Base purified water					Milk	Fruit juice			Good									Doxycycline	30 mins to 1 hour	Cardio	Easy	9+	1	Soft and formed (like peanut butter)	2330
2016-04-04 18:52:00	2016-04-04 18:52:00	97443	1009	20160403	2016-04-03	500	Cereal		All of it	Meatball Sub		All of it	Bbq Pork Loin		All of it	None		Base purified water		Soda			Milk	Fruit juice			Good									Doxycycline	Less than 30 mins	Free weights	Moderate	9+	0		2300
2016-04-04 21:50:00	2016-04-04 21:50:00	143	1009	20160404	2016-04-04	500	Ham Cheese Omelet, Biscuit		All of it	Beef Lasange, Salad		1/2 of it	Pork Chop, Mashed Potatoes		3/4 of it	None		Base purified water						Fruit juice			Good									Doxycycline	30 mins to 1 hour	2 mile run	Challenging	9+	1	Hard and formed (like a cigar)	2230
2016-04-06 09:24:00	2016-04-06 09:24:00	114	1009	20160406	2016-04-05	500	Ham Cheese Omelet		All of it	Rib Eye Steak, Shrimp, Corn		All of it	Meatball Sub		3/4 of it	None		Base purified water					Milk	Fruit juice			Good									Doxycycline	30 mins to 1 hour	Muscle failure	Challenging	9+	1	Hard and formed (like a cigar)	2230
2016-04-06 22:28:00	2016-04-06 22:28:00	153	1009	20160406	2016-04-06	500	Ham Cheese Omelet		All of it	Chopped Steak, Fries		All of it	Chicken Strips, Cheese Sticks		3/4 of it	None		Base purified water					Milk	Fruit juice			Good									Doxycycline	30 mins to 1 hour	2mile run	Challenging	9+	1	Soft and formed (like peanut butter)	2230
2016-04-08 08:27:00	2016-04-08 08:27:00	112	1009	20160407	2016-04-07	500	Cereal		All of it	Tacos		All of it	Chicken Nuggets		All of it	None		Base purified water						Fruit juice			Good									Doxycycline	30 mins to 1 hour	Basketball	Moderate	9+	2	Soft and formed (like peanut butter)	2230
2016-04-11 09:17:00	2016-04-11 09:17:00	119	1009	20160409	2016-04-09	1000	Yogurt, Pancake		All of it	Chicken Fajita		3/4 of it	6 Chicken Strips		All of it	None		Base purified water					Milk	Fruit juice	Yogurt		Good									Doxycycline	30 mins to 1 hour	Cardio	Moderate	9+	1	Soft and formed (like peanut butter)	NA
2016-04-11 09:20:00	2016-04-11 09:20:00	143	1009	20160410	2016-04-10	730	Cereal		All of it	Tuna Sandwich		All of it	Chopped Steak, Fries		All of it	None		Base purified water						Fruit juice			Good									Docycycline	30 mins to 1 hour	Softball	Easy	2019-09-06	1	Soft and formed (like peanut butter)	2230
2016-04-11 20:25:00	2016-04-11 20:25:00	145	1009	20160411	2016-04-11	500	Ham Cheese Omelet, Oat Meal		3/4 of it	Fried Chicken, Baked Potatoe		3/4 of it	Chicken Fajita		3/4 of it	Kit kat		Base purified water						Fruit juice			Good									Doxycycline	30 mins to 1 hour	2 mile run	Moderate	9+	1	Soft and formed (like peanut butter)	2230
2016-04-12 23:30:00	2016-04-12 23:30:00	97510	1009	20160412	2016-04-12	500	Ham Cheese Omelet, Bacon		All of it	Fried Pork Steak, Mashed Potatoes		All of it	Spaghetti		3/4 of it	Rice crispi treat		Base purified water					Milk	Fruit juice			Good									Doxycycline	Less than 30 mins	Push ups, sit ups	Moderate	9+	1	Hard and formed (like a cigar)	2300
2016-04-15 07:34:00	2016-04-15 07:34:00	175	1009	20160414	2016-04-14	500	2 Fried Eggs, Biscuit		All of it	Roast Beef, Mashed Potatoes		All of it	Fried Fish, White Rice		All of it	None		Base purified water					Milk	Fruit juice			Good									Doxycycline	30 mins to 1 hour	2mile run	Moderate	9+	1	Soft and formed (like peanut butter)	2300
2016-04-16 16:28:00	2016-04-16 16:28:00	134	1009	20160415	2016-04-15	500	2 Fried Eggs, Oatmeal		All of it	Cheeseburger, Fries		3/4 of it	Chickin Fajita		3/4 of it	None		Base purified water						Fruit juice		Beer, wine, or spirits	Good									Doxycycline	30 mins to 1 hour	5K run	Moderate	9+	1	Soft and formed (like peanut butter)	2300
2016-04-17 14:28:00	2016-04-17 14:28:00	128	1009	20160416	2016-04-16	800	Cereal		All of it	Ham Sandwich		All of it	Spaghetti		All of it	None		Base purified water			Sports energy drink (e.g. Gatorade)		Milk	Fruit juice		Beer, wine, or spirits	Good									Doxycycline	30 mins to 1 hour	Gym	Easy	9+	1	Hard and formed (like a cigar)	2200
2016-04-19 22:39:00	2016-04-19 22:39:00	136	1009	20160418	2016-04-18	500	Pancakes		All of it	Fried Chicken, Mashed Potatoes		All of it	Steak, Fries		All of it	None		Base purified water			Sports energy drink (e.g. Gatorade)		Milk	Fruit juice			Good									Doxycycline	1 to 2 hours	Lifted weights	Moderate	9+	2	Soft and formed (like peanut butter)	2200
2016-04-19 22:52:00	2016-04-19 22:52:00	136	1009	20160419	2016-04-19	500	Scrambled Eggs, Biscuit		All of it	2 Tacos		All of it	Peanut Butter Jelly Sandwich		All of it	None		Base purified water		Soda	Sports energy drink (e.g. Gatorade)			Fruit juice			Good									Doxycycline	Less than 30 mins	2 mile run	Moderate	9+	1	Soft and formed (like peanut butter)	2230
2016-04-24 23:35:00	2016-04-24 23:35:00	108	1009	20160422	2016-04-22	500	Pancakes		All of it	Ham Sandwich, Chips		All of it	Chicken Fajita		3/4 of it	None		Base purified water					Milk	Fruit juice			Good									Doxycycline	Less than 30 mins	2 mile run	Moderate	9+	1	Soft and formed (like peanut butter)	2200
2016-04-24 23:37:00	2016-04-24 23:37:00	145	1009	20160423	2016-04-23	500	Ham Cheese Omelet		All of it	Spagetti O's		All of it	2 Slices Pizza		All of it	None		Base purified water		Soda			Milk	Fruit juice			Good									Doxycycline	Less than 30 mins	Basketball	Easy	9+	1	Hard and formed (like a cigar)	2230
2016-04-24 23:40:00	2016-04-24 23:40:00	185	1009	20160424	2016-04-24	700	Scrambled Eggs, Hash Browns, Bacon		3/4 of it	Cheese Burger		3/4 of it	Chicken Nuggets, Mashed Potatoes		All of it	None		Base purified water		Soda				Fruit juice		Beer, wine, or spirits	Good									Doxycycline	30 mins to 1 hour	Gym lifted weights	Moderate	9+	1	Soft and formed (like peanut butter)	2200
2016-04-25 23:41:00	2016-04-25 23:41:00	141	1009	20160425	2016-04-25	520	Scrambled Eggs, Bacon		All of it	Big Mac, Fries		3/4 of it	Salmon, White Rice		All of it	None		Base purified water					Milk	Fruit juice			Good									Doxycycline	Less than 30 mins	2 mile run	Moderate	9+	2	Soft and formed (like peanut butter)	2230
2016-04-27 09:32:00	2016-04-27 09:32:00	135	1009	20160426	2016-04-26	500	Ham Cheese Omelet, Bacon		All of it	2 Slices Pizza		All of it	Philly Cheese Steak Sandwich, Fries		3/4 of it	None		Base purified water					Milk	Fruit juice			Good									Doxycycline	30 mins to 1 hour	Muscle failure, cardio	Challenging	9+	1	Soft and formed (like peanut butter)	2300
2016-04-28 23:50:00	2016-04-28 23:50:00	153	1009	20160427	2016-04-27	520	Ham Cheese Omelet		All of it	Chicken Fajita		All of it	Fried Pork Chop Mashed Potatoes		All of it	None		Base purified water					Milk	Fruit juice			Good									Doxycycline	Less than 30 mins	2mile run	Moderate	9+	1	Soft and formed (like peanut butter)	2230
2016-04-28 23:52:00	2016-04-28 23:52:00	149	1009	20160428	2016-04-28	520	Bacon, Fried Eggs, Pancake		3/4 of it	Chili Dog, Onion Rings		All of it	Ham Sandwich, Plain Chips		All of it	Bag of skittles		Base purified water					Milk	Fruit juice		Beer, wine, or spirits	Good									Doxycycline	30 mins to 1 hour	Gym, shoulders	Moderate	9+	2	Soft and formed (like peanut butter)	2300
2016-05-01 23:05:00	2016-05-01 23:05:00	143	1009	20160429	2016-04-29	500	Pancakes		All of it	Chicken Fajita		All of it	Pork Chop Mashed Potatoes		All of it	None		Base purified water					Milk	Fruit juice		Beer, wine, or spirits	Good									Doxycycline	Less than 30 mins	Lifted weights	Moderate	9+	2	Soft and formed (like peanut butter)	2230
2016-05-01 23:07:00	2016-05-01 23:07:00	134	1009	20160430	2016-04-30	700	Cereal		All of it	Beefaroni		All of it	Chopped Steak, Fries		All of it	None		Base purified water						Fruit juice			Good									Doxycycline	Less than 30 mins	Basketball	Moderate	9+	1	Soft and formed (like peanut butter)	2330
2016-05-01 23:09:00	2016-05-01 23:09:00	137	1009	20160501	2016-05-01	900	Ham Cheese Omelet		All of it	Hamburger Fries		All of it	10 Chicken Wings		All of it	None		Base purified water					Milk	Fruit juice			Good									Doxycycline	30 mins to 1 hour	Cardio	Moderate	9+	1	Soft and formed (like peanut butter)	2230
2016-05-08 00:22:00	2016-05-08 00:22:00	108	1009	20160504	2016-05-04	500	Cereal		All of it	Cheeseburger, Fries		3/4 of it	Beef Lasagna		3/4 of it	None		Base purified water		Soda			Milk	Fruit juice			Good									Doxycycline	30 mins to 1 hour	Cardio	Moderate	9+	1	Soft and formed (like peanut butter)	2230
2016-05-08 00:25:00	2016-05-08 00:25:00	143	1009	20160505	2016-05-05	500	Ham Cheese Omelet		All of it	Chicken Salad		All of it	Grilled Pork Chop, Mashed Potatoes		3/4 of it	None		Base purified water						Fruit juice			Good									Doxycycline	30 mins to 1 hour	Muscle failure	Challenging	9+	1	Soft and formed (like peanut butter)	2230
2016-05-08 00:27:00	2016-05-08 00:27:00	137	1009	20160506	2016-05-06	500	Scrambled Eggs, Toast		All of it	Ham Cheese Sandwich, Plain Chips		All of it	Chopped Steak, Onion Rings		3/4 of it	None		Base purified water						Fruit juice			Good									Doxycycline	Less than 30 mins	2 mile run	Moderate	9+	1	Soft and formed (like peanut butter)	2200
2016-05-15 23:59:00	2016-05-15 23:59:00	689509	1009	20160507	2016-05-07	520	Ham Cheese Omelet		All of it	Chicken Faijta		All of it	Pork Chop Mashed Potatoes		3/4 of it	None		Base purified water					Milk	Fruit juice			Good									Doxycycline	Less than 30 mins	Cardio	Moderate	9+	1	Soft and formed (like peanut butter)	2200
2016-05-16 00:01:00	2016-05-16 00:01:00	125	1009	20160508	2016-05-08	520	Ham Cheese Omelet		All of it	Cheese Burger Fries		3/4 of it	Chicken Fajita		3/4 of it	None		Base purified water					Milk	Fruit juice			Good									Doxycycline	Less than 30 mins	2 mile run	Moderate	9+	1	Soft and formed (like peanut butter)	2230
2016-05-16 00:03:00	2016-05-16 00:03:00	120	1009	20160509	2016-05-09	520	Ham Cheese Omelet		All of it	Chopped Steak, Fries		3/4 of it	Meatball Sandwich		All of it	None		Base purified water					Milk	Fruit juice			Good									Doxycycline	Less than 30 mins	Muscle failure	Moderate	9+	1	Soft and formed (like peanut butter)	2245
2016-05-16 00:05:00	2016-05-16 00:05:00	140	1009	20160510	2016-05-10	500	Ham Cheese Omelet, Oatmeal		3/4 of it	2 Tacos		All of it	Fried Shrimp, Fries		3/4 of it	None		Base purified water					Milk	Fruit juice			Good									Doxycycline	Less than 30 mins	Lifted weights	Moderate	9+	1	Soft and formed (like peanut butter)	2230
2016-05-16 00:08:00	2016-05-16 00:08:00	185	1009	20160511	2016-05-11	500	Ham Cheese Omelet, Hashbrown		All of it	Chicken Salad Sandwich		All of it	Chicken Fajita		All of it	None		Base purified water					Milk	Fruit juice			Good									Doxycycline	30 mins to 1 hour	Cardio	Challenging	9+	1	Soft and formed (like peanut butter)	2230
2016-05-16 18:33:00	2016-05-16 18:33:00	65966	1009	20160512	2016-05-12	500	Ham Cheese Omelet, Biscuit		All of it	Chicken Fajita		All of it	Meatloaf, Mashed Potatoes		All of it	None		Base purified water					Milk	Fruit juice		Beer, wine, or spirits	Good									Doxycycline	Less than 30 mins	Abs	Moderate	9+	1	Soft and formed (like peanut butter)	2200
2016-05-16 18:36:00	2016-05-16 18:36:00	132	1009	20160513	2016-05-13	510	2 Fried Eggs, Bacon		All of it	Tomato Soup, Crackers		All of it	2 Grilled Cheese, Fries		3/4 of it	None		Base purified water					Milk	Fruit juice			Good									Doxycycline	Less than 30 mins	Cardio	Moderate	9+	1	Soft and formed (like peanut butter)	2230
2016-05-16 18:38:00	2016-05-16 18:38:00	145	1009	20160514	2016-05-14	520	2 Fried Eggs, Bacon, Biscuit		3/4 of it	Pizza		3/4 of it	Chicken Strips, Mashed Potatoes		3/4 of it	None		Base purified water					Milk	Fruit juice			Good									Doxycycline	30 mins to 1 hour	5K	Challenging	9+	1	Soft and formed (like peanut butter)	2230
2016-05-16 18:41:00	2016-05-16 18:41:00	152	1009	20160515	2016-05-15	520	Ham Cheese Omelet, Oatmeal		3/4 of it	Chicken Fajita		3/4 of it	Chicken Salad Sandwich, Chips		All of it	None		Base purified water					Milk	Fruit juice		Beer, wine, or spirits	Good									Doxycycline	Less than 30 mins	Stretched	Easy	9+	1	Soft and formed (like peanut butter)	2200
2016-05-18 21:21:00	2016-05-18 21:21:00	182401	1009	20160516	2016-05-16	500	Ham Cheese Omelet, Bacon, Hashbrown		3/4 of it	Fried Chicken, Mashed Potatoes, Roll		3/4 of it	Chicken Fajita		All of it	None		Base purified water						Fruit juice			Good									Doxycycline	30 mins to 1 hour	Lifted weights	Moderate	9+	1	Hard and formed (like a cigar)	2230
2016-05-18 21:23:00	2016-05-18 21:23:00	135	1009	20160517	2016-05-17	520	2 Fried Eggs, Biscuit		All of it	Spaghetti, Toast		3/4 of it	2 Grilled Cheese Fries		All of it	None		Base purified water						Fruit juice			Good									Doxycycline	30 mins to 1 hour	Cardio	Moderate	9+	1	Soft and formed (like peanut butter)	2230
2016-05-30 08:04:00	2016-05-31 10:13:00	174	1009	20160518	2016-05-18	520	Ham Cheese Omelet		All of it	Cheese Burger Fries		3/4 of it	Baked Chicken Mashed Pototoes		3/4 of it	None		Base purified water					Milk	Fruit juice			Good									Doxycycline	30 mins to 1 hour	2 mile run	Moderate	9+	1	Soft and formed (like peanut butter)	2230
2016-05-30 08:07:00	2016-05-31 10:13:00	153	1009	20160519	2016-05-19	520	2 Fried Eggs, Biscuit		All of it	Spaghetti, Garlic Bread		3/4 of it	Chicken Strips, Mashed Potatoes		3/4 of it	None		Base purified water						Fruit juice			Good									Doxycycline	30 mins to 1 hour	Muscle failure	Challenging	9+	1	Soft and formed (like peanut butter)	2230
2016-05-30 08:15:00	2016-05-31 10:13:00	446	1009	20160520	2016-05-20	520	2 Fried Eggs, Biscuit, Hash Brown		3/4 of it	Philly Steak Sandwich		All of it	Burrito, Rice		3/4 of it	None		Base purified water			Sports energy drink (e.g. Gatorade)			Fruit juice			Good									Doxycycline	30 mins to 1 hour	2 mile run	Moderate	9+	1	Soft and formed (like peanut butter)	2230
2016-05-30 08:18:00	2016-05-31 10:13:00	211	1009	20160521	2016-05-21	900	Cereal		All of it	Chicken Salad Sandwich, Chips		3/4 of it	Chicken Wings, Fries		All of it	None		Base purified water					Milk	Fruit juice		Beer, wine, or spirits	Good									Doxycycline	Less than 30 mins	Upper body, weights	Moderate	9+	1	Hard and formed (like a cigar)	2300
2016-05-30 13:12:00	2016-05-31 10:13:00	248	1009	20160522	2016-05-22	1000	Oatmeal		All of it	Buffalo Wings		All of it	Pizza 3 Slices Pepperoni		All of it	Chips,, salsa		Base purified water					Milk	Fruit juice			Good									Doxycycline	Less than 30 mins	Gym treadmill	Moderate	9+	1	Hard and formed (like a cigar)	2330
2016-05-30 14:30:00	2016-05-31 10:13:00	4691	1009	20160523	2016-05-23	520	2 Fried Eggs, Bacon, Hashbrown		3/4 of it	Chicken Fajita		All of it	Meatloaf, Mashed Potatoes		3/4 of it	None		Base purified water					Milk	Fruit juice			Good									Doxycycline	30 mins to 1 hour	2 mile run	Moderate	9+	1	Soft and formed (like peanut butter)	2200
2016-05-30 14:36:00	2016-05-31 10:13:00	372	1009	20160524	2016-05-24	520	Ham Cheese Omelet, Bacon		All of it	Shrimp And Rice		All of it	Pork Ribs, Mashed Potatoes		3/4 of it	None		Base purified water		Soda			Milk	Fruit juice			Good									Doxycycline	30 mins to 1 hour	Muscle failure	Challenging	9+	1	Hard and formed (like a cigar)	2230
2016-05-30 14:39:00	2016-05-31 10:13:00	180	1009	20160525	2016-05-25	520	Ham Cheese Omelet, Biscuit		All of it	Roast Pork, Mashed Potatoes		All of it	Spaghetti, Bread, Salad		3/4 of it	None		Base purified water						Fruit juice			Good									Doxycycline	30 mins to 1 hour	5k run	Challenging	9+	1	Hard and formed (like a cigar)	2230
2016-05-30 14:43:00	2016-05-31 10:13:00	154	1009	20160526	2016-05-26	520	Oatmeal, Bacon		All of it	Grilled Steak, Rice		All of it	Bbq Chicken, Mashed Potatoes		All of it	None		Base purified water						Fruit juice		Beer, wine, or spirits	Good									Doxycycline	30 mins to 1 hour	Gym free weights	Moderate	9+	1	Soft and formed (like peanut butter)	2230
2016-05-30 14:50:00	2016-05-31 10:13:00	239	1009	20160527	2016-05-27	520	Scrambled Eggs, Bacon, Biscuit		All of it	Fried Pork, Rice		3/4 of it	Chicken Fajita, Fries		3/4 of it	None		Base purified water			Sports energy drink (e.g. Gatorade)			Fruit juice			Good									Doxycycline	30 mins to 1 hour	2 mile run	Moderate	9+	1	Soft and formed (like peanut butter)	2230
2016-05-30 16:24:00	2016-05-31 10:13:00	170	1009	20160528	2016-05-28	900	Ceral, Donut		All of it	Philly Cheese Steak Sandwich, Fries		All of it	Chicken Nuggets, Mashed Potatoes		3/4 of it	None		Base purified water					Milk	Fruit juice		Beer, wine, or spirits	Good									Doxycycline	Less than 30 mins	Push ups, sit ups	Moderate	9+	1	Hard and formed (like a cigar)	2330
2016-05-30 16:27:00	2016-05-31 10:13:00	167	1009	20160529	2016-05-29	830	Cereal, Fruit		All of it	Fish Sticks, Fries Salad		3/4 of it	Beef Strips, Rice		All of it	Chips, cheese dip		Base purified water						Fruit juice		Beer, wine, or spirits	Good									Doxycycline	30 mins to 1 hour	Gym	Moderate	9+	1	Hard and formed (like a cigar)	2230
2016-05-31 10:19:00	2016-05-31 10:19:00	313	1009	20160530	2016-05-30	430	Scrambled Eggs, Bacon, Hashbrown		All of it	3 Hot Wings, Salad		All of it	Philly Steak Sandwich, Onion Rings		All of it	None		Base purified water					Milk	Fruit juice			Good									Doxycycline	30 mins to 1 hour	Upper body	Moderate	9+	1	Soft and formed (like peanut butter)	2230
2016-06-05 21:29:00	2016-06-05 21:29:00	135	1009	20160601	2016-06-01	500	Ham Cheese Omelet		All of it	Philly Sandwich, Fries		3/4 of it	Buffalo Wings, Salad		All of it	Chips		Base purified water			Sports energy drink (e.g. Gatorade)			Fruit juice			Good									Doxycycline	30 mins to 1 hour	2 mile run	Moderate	9+	1	Soft and formed (like peanut butter)	2230
2016-06-05 21:34:00	2016-06-05 21:34:00	310	1009	20160602	2016-06-02	500	2 Fried Eggs, Biscuit		All of it	Chicken Salad		All of it	Chicken Salad		All of it	Candy bar		Base purified water		Soda	Sports energy drink (e.g. Gatorade)					Beer, wine, or spirits	Good									Doxycycline	30 mins to 1 hour	Upper body, muscle faillure	Challenging	2019-09-06	1	Soft and formed (like peanut butter)	2230
2016-06-05 21:37:00	2016-06-05 21:37:00	165	1009	20160603	2016-06-03	520	2 Fried Eggs, Bacon, Biscuit		All of it	Fried Chicken, Mashed Potatoes		All of it	Chicken Salad		All of it	None		Base purified water						Fruit juice			Good									Doxycycline	30 mins to 1 hour	2 mile	Moderate	9+	1	Hard and formed (like a cigar)	2230
2016-06-05 22:16:00	2016-06-05 22:16:00	2349	1009	20160604	2016-06-04	520	Ham Cheese Omelet, Home Fries		All of it	Chicken Fajita		All of it	Fried Pork Chop, Mashed Potatoes		All of it	None	Bottled water	Base purified water			Sports energy drink (e.g. Gatorade)			Fruit juice			Good									Doxycycline	30 mins to 1 hour	Softball	Easy	9+	1	Hard and formed (like a cigar)	2230
2016-06-05 22:18:00	2016-06-05 22:18:00	112	1009	20160605	2016-06-05	900	Cereal		All of it	Pizza 3 Slices		All of it	Chicken, Rice		All of it	None	Bottled water	Base purified water			Sports energy drink (e.g. Gatorade)			Fruit juice		Beer, wine, or spirits	Good									Doxycycline	30 mins to 1 hour	Football	Moderate	2019-09-06	1	Hard and formed (like a cigar)	2200
2016-06-16 11:41:00	2016-06-20 08:41:00	137	1009	20160606	2016-06-06	520	Ham Cheese Omelet, Hash Brown Bacon		All of it	Chicken Salad		All of it	Philly Steak Sandwich		All of it	Candy bar		Base purified water			Sports energy drink (e.g. Gatorade)		Milk	Fruit juice			Good									Doxycycline	30 mins to 1 hour	2 mile run	Moderate	9+	1	Hard and formed (like a cigar)	2230
2016-06-17 16:11:00	2016-06-20 08:41:00	183	1009	20160607	2016-06-07	520	Ham Cheese Omelet, Bacon		All of it	Chicken Salad		All of it	Baked Chicken, Mashed Potatoes		All of it	None		Base purified water			Sports energy drink (e.g. Gatorade)			Fruit juice			Good									Doxycycline	30 mins to 1 hour	Muscle failure upper body	Challenging	9+	1	Hard and formed (like a cigar)	2230
2016-06-17 16:17:00	2016-06-20 08:41:00	358	1009	20160608	2016-06-08	520	Scrambled Eggs, Biscuit, Bacon		All of it	Philly Steak Sandwich, Fries		All of it	Meatball 6" Chips		All of it	None		Base purified water						Fruit juice			Good									Doxycycline	30 mins to 1 hour	5k run	Challenging	9+	1	Soft and formed (like peanut butter)	2200
2016-06-17 16:22:00	2016-06-20 08:41:00	259	1009	20160609	2016-06-09	520	Peanut Butter And Jelly Sandwich		All of it	Chicken Salad		All of it	6 Bbq Buffalo Wings		All of it	None		Base purified water		Soda				Fruit juice			Good									Doxycycline	30 mins to 1 hour	Muscle failure	Moderate	9+	1	Soft and formed (like peanut butter)	2230
2016-06-20 08:41:00	2016-06-20 08:41:00	136	1009	20160610	2016-06-10	520	Ham Cheese Omelet, Bacon		All of it	Baked Chicken, Rolls, Salad		All of it	12 Buffalo Wings		All of it	None		Base purified water						Fruit juice			Good									Doxycycline	30 mins to 1 hour	2 mile run	Moderate	9+	1	Hard and formed (like a cigar)	2230
2016-06-20 08:44:00	2016-06-20 08:44:00	140	1009	20160611	2016-06-11	830	PopTarts		All of it	6 Inch Meatball Sub, Chips		All of it	Lasagna, Salad		3/4 of it	None		Base purified water					Milk	Fruit juice		Beer, wine, or spirits	Good									Doxycycline	Less than 30 mins	Upper body free weights	Moderate	9+	1	Soft and formed (like peanut butter)	2330
2016-06-20 08:46:00	2016-06-20 08:46:00	138	1009	20160612	2016-06-12	800	2 Fried Eggs, Bacon, Biscuit, Pancake		All of it	3 Slices Pizza		All of it	Chicken Salad		3/4 of it	None		Base purified water					Milk	Fruit juice			Good									Doxycycline	Less than 30 mins	Cardio	Moderate	9+	1	Soft and formed (like peanut butter)	2230
2016-06-20 11:56:00	2016-06-20 19:09:00	180	1009	20160613	2016-06-13	520	Ham Cheese Omelet, Biscuit, Fruit		All of it	Grilled Cheese, Onion Rings		All of it	Chicken Salad		All of it	None		Base purified water						Fruit juice			Good									Doxycycline	30 mins to 1 hour	2 mile run	Moderate	9+	1	Soft and formed (like peanut butter)	2230
2016-06-20 12:01:00	2016-06-20 19:09:00	326	1009	20160614	2016-06-14	520	2 Fried Eggs, Toast		All of it	Shrimp, Steak, Lobster, Fries		All of it	Philly Steak Sandwich		All of it	None		Base purified water						Fruit juice			Good									Doxycycline	30 mins to 1 hour	Muscle failure	Challenging	9+	1	Soft and formed (like peanut butter)	2230
2016-06-20 12:54:00	2016-06-20 19:09:00	3147	1009	20160615	2016-06-15	520	Waffle, Hashbrown		All of it	Chicken Fajitas		All of it	Beef Stew Grilled Cheese		3/4 of it	None		Base purified water			Sports energy drink (e.g. Gatorade)			Fruit juice			Good									Doxycycline	30 mins to 1 hour	2 mile run	Moderate	9+	1	Soft and formed (like peanut butter)	2230
2016-06-20 12:57:00	2016-06-20 19:09:00	182	1009	20160616	2016-06-16	520	Ham Cheese Omelet, Pancakes		All of it	Chicken Enchiladas, Rice		3/4 of it	Philly Steak Sandwich, Fries		All of it	1 small bag chips		Base purified water			Sports energy drink (e.g. Gatorade)			Fruit juice		Beer, wine, or spirits	Good									Doxycycline	30 mins to 1 hour	Gym, biceps, shoulders	Challenging	9+	1	Soft and formed (like peanut butter)	2230
2016-06-20 19:09:00	2016-06-20 19:09:00	22343	1009	20160617	2016-06-17	520	Ham Cheese Omelet, Bacon		All of it	Fish, Mashed Potatoes, Gravy, Roll		All of it	Chivken Fajita		All of it	None		Base purified water						Fruit juice			Good									Doxycycline	30 mins to 1 hour	Muscle failure, 10 exercises	Challenging	9+	1	Hard and formed (like a cigar)	2230
2016-06-20 19:12:00	2016-06-20 19:12:00	132	1009	20160618	2016-06-18	520	Waffle, Watermelon Chunks		All of it	Ham Sandwich, Onion Rings		All of it	Philly Sandwich, Salad		All of it	None		Base purified water			Sports energy drink (e.g. Gatorade)		Milk	Fruit juice			Good									Doxycycline	30 mins to 1 hour	2 mile run	Moderate	9+	1	Soft and formed (like peanut butter)	2300
2016-06-20 19:14:00	2016-06-20 19:14:00	141	1009	20160619	2016-06-19	830	Cereal		All of it	6 Inch Meatball Sub		All of it	2 Grilled Chicken Breast, Salad		All of it	None		Base purified water			Sports energy drink (e.g. Gatorade)			Fruit juice		Beer, wine, or spirits	Good									Doxycycline	Less than 30 mins	Gym legs, upper body	Moderate	9+	1	Soft and formed (like peanut butter)	2330
2016-06-20 22:58:00	2016-06-20 22:58:00	151	1009	20160620	2016-06-20	520	Ham Cheese Omelet, Bacon, Biscuit, Hashbrown		3/4 of it	Salmon, Mac And Cheese, Roll		All of it	Philly Steak Sandwich, Onion Rings		All of it	Ice cream		Base purified water			Sports energy drink (e.g. Gatorade)		Milk	Fruit juice			Good									Doxycycline	30 mins to 1 hour	Stretches, 2 mile run	Moderate	9+	1	Soft and formed (like peanut butter)	2230
2016-06-21 21:14:00	2016-06-21 21:14:00	80136	1009	20160621	2016-06-21	520	4 Pancakes, Scrambled Eggs, 3 Strips Bacon		3/4 of it	3 Chicken Strips, Fries		All of it	6 Inch Meatball Sub		All of it	None		Base purified water		Soda				Fruit juice			Good									Doxycycline	Less than 30 mins	Gym cardio	Moderate	9+	1	Soft and formed (like peanut butter)	2200
2016-06-22 22:27:00	2016-06-24 00:10:00	90814	1009	20160622	2016-06-22	500	Scrambled Eggs, Pancake, Bacon, Hashbrown		All of it	3 Mexican Tacos		All of it	2 Chicken Strips, 2 Rolls		All of it	Apple		Base purified water			Sports energy drink (e.g. Gatorade)			Fruit juice			Good									Doxycycline	Less than 30 mins	2 mile run	Moderate	9+	1	Soft and formed (like peanut butter)	2200
2016-06-24 00:10:00	2016-06-24 00:10:00	92576	1009	20160623	2016-06-23	520	Scrambled Eggs, Bacon, Hashbrown, 2 Pancakes		All of it	Fried Chicken Breast, Mashed Potatoes. Salad, 2 Rolls		All of it	Philly Steak Sandwich, Salad		All of it	Banana		Base purified water			Sports energy drink (e.g. Gatorade)			Fruit juice			Good									Doxycycline	30 mins to 1 hour	14 exercises, muscle failure	Challenging	9+	1	Soft and formed (like peanut butter)	2230
2016-06-24 17:03:00	2016-06-24 17:03:00	151	1009	20160624	2016-06-24	520	Ham Cheese Omelet, Bacon, Hasbrown		All of it	Roast Turkey, Mashed Potatoes, 2 Rolls		All of it	6 Inch Meatball Sub		All of it	Apple		Base purified water			Sports energy drink (e.g. Gatorade)			Fruit juice			Good									Doxycycline	30 mins to 1 hour	Flag football practice	Moderate	9+	1	Soft and formed (like peanut butter)	2230
2016-07-06 11:56:00	2016-07-06 21:13:00	138	1009	20160625	2016-06-25	800	Pop Tarts		All of it	6 Inch Meatball Sandwich		All of it	3 Slices Cheese Pizza		All of it	Small bag doritos		Base purified water		Soda				Fruit juice			Good									Doxycycline	30 mins to 1 hour	Cardio	Moderate	9+	1	Hard and formed (like a cigar)	2330
2016-07-06 12:02:00	2016-07-06 21:14:00	383	1009	20160626	2016-06-26	900	Scrambled Eggs, Toast		All of it	Hamburger, Fries		All of it	Chicken Tenders, Salad		All of it	None		Base purified water						Fruit juice			Good									Doxycycline	Less than 30 mins	Upper body	Moderate	9+	1	Soft and formed (like peanut butter)	2230
2016-07-06 15:14:00	2016-07-06 21:14:00	11500	1009	20160627	2016-06-27	520	Ham Cheese Omelet, Bacon		All of it	Chicken Fajita		All of it	Spaghetti, Meatballs		All of it	None		Base purified water						Fruit juice		Beer, wine, or spirits	Good									Doxycycline	30 mins to 1 hour	3K run	Moderate	9+	1	Soft and formed (like peanut butter)	2230
2016-07-06 16:02:00	2016-07-06 21:14:00	2855	1009	20160628	2016-06-28	520	Waffle		All of it	2 Grilled Cheese Sandwiches, Chips		All of it	Baked Chicken Breast, Mashed Potatoes		All of it	None		Base purified water						Fruit juice			Good									Doxycycline	30 mins to 1 hour	Miscle failure PRT	Challenging	9+	1	Soft and formed (like peanut butter)	2230
2016-07-06 16:25:00	2016-07-06 21:14:00	1399	1009	20160629	2016-06-29	520	Ham Cheese Omelet, Hashbrown		All of it	Philly Steak Sandwich		All of it	3 Slices Cheese Pizza		All of it	None		Base purified water		Soda				Fruit juice			Good									Doxycycline	30 mins to 1 hour	3K run	Moderate	9+	1	Soft and formed (like peanut butter)	2345
2016-07-07 10:48:00	2016-07-11 18:37:00	149	1009	20160701	2016-07-01	520	Ham Cheese Omelet, Bacon		All of it	Tuna Sandwich, Fries		All of it	6 Inch Meatball Sandwich, Dorito Chips		All of it	None		Base purified water			Sports energy drink (e.g. Gatorade)			Fruit juice	Yogurt		Good									Doxycycline	30 mins to 1 hour	3K run	Moderate	9+	1	Soft and formed (like peanut butter)	2230
2016-07-11 11:44:00	2016-07-11 18:37:00	348944	1009	20160701	2016-07-02	520	Scrambled Eggs Toast		All of it	Chicken Fajita		All of it	Philly Steak Sub Sandwich		All of it	None		Base purified water		Soda				Fruit juice			Good									Doxycycline	30 mins to 1 hour	5K run	Moderate	9+	1	Soft and formed (like peanut butter)	2230
2016-07-11 18:37:00	2016-07-11 18:37:00	24816	1009	20160703	2016-07-03	900	Poptart		All of it	Grilled Chicken Breast, White Rice		All of it	Cheeseburger, Fries		All of it	None		Base purified water						Fruit juice			Good									Doxycycline	30 mins to 1 hour	Lifted weights	Moderate	9+	1	Soft and formed (like peanut butter)	2330
2016-07-11 18:40:00	2016-07-11 18:40:00	132	1009	20160704	2016-07-04	1000	2 Pancakes, Bacon		All of it	3 Slices Cheese Pizza		All of it	Fried Chicken, Fries		All of it	None		Base purified water		Soda				Fruit juice		Beer, wine, or spirits	Good									Doxycycline	30 mins to 1 hour	Cardio	Moderate	9+	1	Soft and formed (like peanut butter)	2230
2016-07-18 21:21:00	2016-07-18 21:21:00	157	1009	20160705	2016-07-05	520	Ham Cheese Omelet, Bacon		All of it	Steak, Shrimp, Corn On Cob		All of it	Breaded Pork Steak, Mashed Potatoes		All of it	None		Base purified water		Soda				Fruit juice			Good									Doxycycline	30 mins to 1 hour	Muscle failure legs	Moderate	9+	1	Hard and formed (like a cigar)	2230
2016-07-18 21:24:00	2016-07-18 21:24:00	142	1009	20160706	2016-07-06	520	Ham Cheese Omelet, Bacon Biscuit		All of it	Pork Roast, Mashed Potatoes, Salad		All of it	Chicken Pot Pie		All of it	None		Base purified water		Soda				Fruit juice			Good									Doxycycline	30 mins to 1 hour	5k run	Moderate	9+	1	Soft and formed (like peanut butter)	2230
2016-07-18 21:26:00	2016-07-18 21:26:00	158	1009	20160707	2016-07-07	520	Ham Cheese Omelet, Bacon Hashbrown, Biscuit		All of it	Philly Steak Sandwich, Fries		All of it	Turkey Cuts, Mashed Potatoes		All of it	None		Base purified water		Soda				Fruit juice		Beer, wine, or spirits	Good									Doxycycline	30 mins to 1 hour	Muscle failure upper body	Challenging	9+	1	Soft and formed (like peanut butter)	2230
2016-07-18 21:29:00	2016-07-18 21:29:00	151	1009	20160708	2016-07-08	520	Ham Cheese Omelet, Biscuit, Bacon		All of it	Fried Chicken, Mashed Potatoes, Gravy		All of it	Spaghetti Meatballs		All of it	None		Base purified water			Sports energy drink (e.g. Gatorade)			Fruit juice			Good									Doxycycline	30 mins to 1 hour	2 mile run	Moderate	9+	1	Soft and formed (like peanut butter)	2345
2016-07-18 21:31:00	2016-07-18 21:31:00	159	1009	20160709	2016-07-09	900	Cereal, Poptart		All of it	6 Inch Meatball Sub		All of it	Cajun Meatloaf, Mashed Potatoes, Salad		All of it	Small bag cheese doritos		Base purified water		Soda				Fruit juice		Beer, wine, or spirits	Good									Doxycycline	Less than 30 mins	Cardio	Moderate	9+	1	Soft and formed (like peanut butter)	2300
2016-07-24 22:43:00	2016-07-24 22:43:00	170	1009	20160710	2016-07-10	900	Poptart, Fruit Cup		All of it	Chicken Nuggets , Fries		All of it	Grilled Ham Slices, Salad		All of it	None		Base purified water		Soda	Sports energy drink (e.g. Gatorade)			Fruit juice		Beer, wine, or spirits	Good									Doxycycline	30 mins to 1 hour	Biceps	Moderate	9+	1	Soft and formed (like peanut butter)	2200
2016-07-24 22:47:00	2016-07-24 22:47:00	263	1009	20160711	2016-07-11	520	Ham Cheese Omelet, Bacon		All of it	Chicken Cordon Blue, Mashed Potatoes		All of it	Cheese Burger, Onion Rings		All of it	None		Base purified water					Milk	Fruit juice			Good									Doxycycline	30 mins to 1 hour	2 mile run	Moderate	9+	1	Soft and formed (like peanut butter)	2230
2016-07-26 14:56:00	2016-08-15 09:31:00	144535	1009	20160712	2016-07-12	520	2 Fried Eggs, Toast		All of it	Chicken Salad Sandwich		All of it	Chicken Fajita, Chips		All of it	Chips		Base purified water			Sports energy drink (e.g. Gatorade)			Fruit juice			Good									Doxycycline	30 mins to 1 hour	Upper body	Moderate	9+	1	Soft and formed (like peanut butter)	2230
2016-07-26 14:59:00	2016-08-15 09:31:00	204	1009	20160713	2016-07-13	515	Ham Cheese Omelet, Bacon		All of it	Cheeseburger, Salad		All of it	2 Slices Pizza		All of it	None		Base purified water		Soda				Fruit juice			Good									Doxycycline	30 mins to 1 hour	2 mile run	Moderate	9+	1	Soft and formed (like peanut butter)	2230
2016-07-26 15:03:00	2016-08-15 09:31:00	240	1009	20160714	2016-07-14	520	Ham Cheese Omelet, Bacon		All of it	Philly Sandwich, Fries		All of it	Meatloaf, Mashed Potatoes		1/4 of it	None		Base purified water		Soda				Fruit juice			Good									Doxycycline	30 mins to 1 hour	Legs, weights	Moderate	9+	1	Soft and formed (like peanut butter)	2230
2016-07-26 17:15:00	2016-08-15 09:31:00	7883	1009	20160715	2016-07-15	520	Ham Cheese Omelet, Hashbrown		All of it	Chili Mac		All of it	Chicken Fajita		All of it	None		Base purified water		Soda				Fruit juice			Good									Doxycycline	30 mins to 1 hour	2 mile run	Moderate	9+	1	Soft and formed (like peanut butter)	2200
2016-07-27 15:31:00	2016-08-15 09:31:00	177	1009	20160716	2016-07-17	830	Breakfast Burrito		All of it	Chicken Fajita		All of it	Baked Chicken, Rolls Mashed Potatoes		All of it	None		Base purified water		Soda					Yogurt	Beer, wine, or spirits	Good									Doxycycline	Less than 30 mins	Push ups, sit ups	Moderate	9+	1	Soft and formed (like peanut butter)	2200
2016-07-27 15:28:00	2016-08-15 09:31:00	80012	1009	20160716	2016-07-16	900	Cereal		All of it	Meatball Sub Sandwich		All of it	2 Grilled Chicken Breast, Fries		3/4 of it	Candy bar		Base purified water		Soda	Sports energy drink (e.g. Gatorade)					Beer, wine, or spirits	Good									Doxycycline	Less than 30 mins	Cardio	Moderate	9+	1	Soft and formed (like peanut butter)	2230
2016-07-27 15:34:00	2016-08-15 09:31:00	135	1009	20160718	2016-07-18	520	2 Fried Eggs, Biscuit		All of it	Philly Sandwich, Chips		All of it	Fried Shrip, Rice, Salad		All of it	Chips		Base purified water						Fruit juice			Good									Doxycycline	30 mins to 1 hour	5K run	Moderate	9+	1	Hard and formed (like a cigar)	2230
2016-07-28 15:14:00	2016-08-15 09:31:00	85229	1009	20160719	2016-07-19	520	Ham Cheese Omelet, Bacon		All of it	Mustard Dill Salmon, Rice		3/4 of it	Grilled Pork Chop, Mashed Potatoes		All of it	None		Base purified water						Fruit juice			Good									Doxycycline	30 mins to 1 hour	2mile run	Moderate	9+	1	Soft and formed (like peanut butter)	2230
2016-07-28 15:17:00	2016-08-15 09:31:00	188	1009	20160720	2016-07-20	520	2 Fried Eggs, Pancakes		All of it	Beef Fajitas		All of it	Bbq Chicken, Mashed Potatoes		All of it	None		Base purified water			Sports energy drink (e.g. Gatorade)			Fruit juice			Good									Doxycycline	30 mins to 1 hour	PRT	Moderate	9+	1	Soft and formed (like peanut butter)	2230
2016-08-01 12:35:00	2016-08-15 09:31:00	830	1009	20160721	2016-07-21	520	Scrambled Eggs, Toast		All of it	Chicken Nuggets, Fries		All of it	Chicken Rice		All of it	None		Base purified water		Soda	Sports energy drink (e.g. Gatorade)			Fruit juice			Good									Doxycycline	30 mins to 1 hour	Prt	Moderate	9+	1	Soft and formed (like peanut butter)	2230
2016-08-02 10:56:00	2016-08-15 09:31:00	151	1009	20160722	2016-07-22	520	Ham Cheese Omelet, Pancakes		All of it	Chicken Cordon Bleu, Mashed Potatoes		All of it	Chili Mac		All of it	None		Base purified water		Soda	Sports energy drink (e.g. Gatorade)			Fruit juice			Good									Doxycycline	30 mins to 1 hour	5K run	Moderate	9+	1	Soft and formed (like peanut butter)	2230
2016-08-02 18:10:00	2016-08-15 09:31:00	133	1009	20160723	2016-07-23	900	Cereal		All of it	Meatball Sub Sandwich		All of it	Meat Loaf, Mashed Potatoes, Rolls		All of it	None		Base purified water		Soda			Milk	Fruit juice		Beer, wine, or spirits	Good										30 mins to 1 hour	Biceps	Moderate	9+	1	Soft and formed (like peanut butter)	2345
2016-08-03 11:35:00	2016-08-15 09:31:00	118	1009	20160724	2016-07-24	830	Poptarts		All of it	Roast Turkey, Mashed Potatoes		All of it	Chicken Fajita		All of it	Candy bar		Base purified water			Sports energy drink (e.g. Gatorade)			Fruit juice			Good									None	Less than 30 mins	Stretched	Easy	9+	1	Soft and formed (like peanut butter)	2230
2016-08-04 10:36:00	2016-08-15 09:31:00	82878	1009	20160725	2016-07-25	520	Waffel		All of it	Baked Chicken, Corn		All of it	Spaghetti Meatballs		All of it	None		Base purified water			Sports energy drink (e.g. Gatorade)			Fruit juice			Good										30 mins to 1 hour	2 mile run	Moderate	9+	1	Soft and formed (like peanut butter)	2200
2016-08-04 10:38:00	2016-08-15 09:31:00	127	1009	20160726	2016-07-26	500	Ham Cheese Omelet		All of it	Roast Pork, Mashed Potatoes		All of it	Salmon Steak, Rice		3/4 of it	None		Base purified water						Fruit juice			Good										30 mins to 1 hour	PRT	Moderate	9+	1	Soft and formed (like peanut butter)	2230
2016-08-04 17:00:00	2016-08-15 09:31:00	138	1009	20160727	2016-07-27	520	Eggs, Bisuit, Bacon		All of it	Chicken Cordon Bleu, Mashed Potatoes		All of it	Pork Schnitzel, Rice		All of it	None		Base purified water			Sports energy drink (e.g. Gatorade)			Fruit juice			Good										30 mins to 1 hour	5K run	Moderate	9+	1	Soft and formed (like peanut butter)	2200
2016-08-15 12:30:00	2016-08-28 23:27:00	128	1009	20160728	2016-07-28	520	Ham Cheese Omelet		All of it	Grilled Salmon Steak, Potatoes		All of it	Beef Ravioli, Garlic Bread		All of it	None		Base purified water						Fruit juice			Good										30 mins to 1 hour	PRT	Moderate	9+	1	Soft and formed (like peanut butter)	2230
2016-08-15 12:32:00	2016-08-28 23:27:00	131	1009	20160729	2016-07-29	520	Ham Cheese Omelet, Oatmeal		All of it	Sweet Sour Shrimp, Rice		All of it	Cheese Burger, Fries		All of it	None		Base purified water						Fruit juice			Good										30 mins to 1 hour	2 mile run	Moderate	9+	1	Soft and formed (like peanut butter)	2200
2016-08-15 12:34:00	2016-08-28 23:27:00	138	1009	20160730	2016-07-30	500	Ham Cheese Omelet, Bacon		All of it	Baked Ham Slice		All of it	Chicken Pot Pie		All of it	None		Base purified water						Fruit juice			Good										30 mins to 1 hour	Cardio	Moderate	9+	1	Soft and formed (like peanut butter)	2230
2016-08-28 23:27:00	2016-08-28 23:27:00	98	1009	20160731	2016-07-31	830	Cereal		All of it	Chicken Nuggets, Fries		All of it	Meatball Sandwich, Chips		All of it	None	Bottled water	Base purified water						Fruit juice			Good										Less than 30 mins	Cardio	Moderate	9+	1	Soft and formed (like peanut butter)	2230
2016-08-28 23:29:00	2016-08-28 23:29:00	132	1009	20160801	2016-08-01	500	Ham Cheese Omelet, Bacon		All of it	Grilled Pork Chop, Mashed Potatoes		All of it	Cheeseburger, Fries		All of it	None	Bottled water	Base purified water						Fruit juice			Good										30 mins to 1 hour	2 mile run	Moderate	9+	1	Soft and formed (like peanut butter)	2230
2016-09-05 21:01:00	2016-09-05 21:01:00	682319	1009	20160802	2016-08-02	500	Ham Cheese Omelet		All of it	Veal Parmesan, Rice		All of it	Beef Stroganoff		All of it	None	Bottled water	Base purified water					Milk	Fruit juice			Good										30 mins to 1 hour	PRT	Moderate	9+	1	Soft and formed (like peanut butter)	2200
2016-09-05 21:03:00	2016-09-05 21:04:00	128	1009	20160803	2016-08-03	500	Ham Cheese Omelet, Hashbrown		All of it	Roast Turkey, Mashed Potatoes		All of it	Hot Chicken Wings, Fries		All of it	None	Bottled water	Base purified water			Sports energy drink (e.g. Gatorade)			Fruit juice			Good										30 mins to 1 hour	2 mile run	Moderate	9+	1	Soft and formed (like peanut butter)	2230
2016-09-05 21:32:00	2016-09-05 21:32:00	1708	1009	20160804	2016-08-04	500	Scrambled Eggs, Bacon		All of it	Chicken Cordon Bleu, Mashed Potatoes		All of it	Beef Burrito, Rice		All of it	None	Bottled water	Base purified water						Fruit juice			Good										30 mins to 1 hour	PRT	Moderate	9+	1	Soft and formed (like peanut butter)	2230
2016-09-05 21:34:00	2016-09-05 21:34:00	122	1009	20160805	2016-08-05	500	Hame Cheese Omelet, Bacon		All of it	Pepper Steak, Rice		All of it	Beef Fajitas, Rice		All of it	None	Bottled water	Base purified water					Milk	Fruit juice			Good										30 mins to 1 hour	2 mile run	Moderate	9+	1	Soft and formed (like peanut butter)	2345
2016-09-05 21:38:00	2016-09-05 21:38:00	216	1009	20160806	2016-08-06	900	Cereal, Pop Tart		All of it	Shrimp Scampy		All of it	Turkey Cutlet, Mashed Potatoes		All of it	None	Bottled water	Base purified water		Soda			Milk	Fruit juice			Good										30 mins to 1 hour	Lifted weights	Moderate	9+	1	Soft and formed (like peanut butter)	2300
2016-09-05 21:45:00	2016-09-05 21:45:00	456	1009	20160807	2016-08-07	900	Pancakes, Bacon		All of it	Cheeseburger, Fries		All of it	Spaghetti, Rolls		All of it	None	Bottled water	Base purified water						Fruit juice			Good										Less than 30 mins	Cardio	Moderate	9+	1	Soft and formed (like peanut butter)	2200
2016-09-05 21:52:00	2016-09-05 21:52:00	408	1009	20160808	2016-08-08	500	Ham Cheese Omelet, Biscuit		All of it	Fried Chicken, Mashed Potatoes		All of it	Beef Stew		All of it	None	Bottled water	Base purified water						Fruit juice			Good										30 mins to 1 hour	2 mile run	Moderate	9+	1	Soft and formed (like peanut butter)	2230
2016-09-05 22:00:00	2016-09-05 22:00:00	493	1009	20160809	2016-08-09	500	Ham Cheese Omelet, Bacon		All of it	Tempura Shrimp, Rice		All of it	Jaegerchmotzel, Mashed Potatoes		All of it	None	Bottled water	Base purified water					Milk	Fruit juice		Beer, wine, or spirits	Good										30 mins to 1 hour	PRT	Moderate	9+	1	Soft and formed (like peanut butter)	2230
2016-09-05 22:05:00	2016-09-05 22:05:00	291	1009	20160810	2016-08-10	500	Oatmeal		All of it	Baked Chicken, Rice		All of it	Cheeseburger, Fries		3/4 of it	Apple	Bottled water	Base purified water		Soda			Milk	Fruit juice			Good										30 mins to 1 hour	PRT	Moderate	9+	1	Soft and formed (like peanut butter)	2200
2016-09-05 22:40:00	2016-09-05 22:40:00	2104	1009	20160811	2016-08-11	500	Oatmeal		All of it	Roast Pork, Mashed Potatoes		All of it	Chicken, Rice		All of it	None	Bottled water	Base purified water			Sports energy drink (e.g. Gatorade)			Fruit juice			Good										30 mins to 1 hour	PRT	Moderate	9+	1	Soft and formed (like peanut butter)	2200
2016-09-12 21:09:00	2016-09-12 21:13:00	599353	1009	20160812	2016-08-12	500	Ham Cheese Omelet		All of it	Roast Beef, Fries		All of it	Beef Pot Roast		All of it	None	Bottled water	Base purified water						Fruit juice			Good										30 mins to 1 hour	2 mile run	Moderate	9+	1	Soft and formed (like peanut butter)	2230
2016-09-12 21:11:00	2016-09-12 21:13:00	109	1009	20160813	2016-08-13	800	Cereal		All of it	Chicken Cordon Bleu, Mashed Potatoes		All of it	Chili Macaroni		All of it	None	Bottled water	Base purified water		Soda				Fruit juice			Good										Less than 30 mins	Cardio	Moderate	9+	1	Soft and formed (like peanut butter)	2330
2016-09-12 21:13:00	2016-09-12 21:13:00	114	1009	20160814	2016-08-14	800	Oatmeal		All of it	Spaghetti With Meatballs		All of it	Meat Loaf, Mashed Potatoes		All of it	None	Bottled water	Base purified water		Soda				Fruit juice			Good										Less than 30 mins	Upper body	Moderate	9+	1	Soft and formed (like peanut butter)	2200
2016-09-12 22:30:00	2016-09-12 22:30:00	4588	1009	20160815	2016-08-15	500	Ham Cheese Omelet, Bacon		All of it	Fried Chicken, Mashed Potatoes		All of it	Turkey Nuggets, Mashed Potatoes		All of it	None	Bottled water	Base purified water						Fruit juice		Beer, wine, or spirits	Good										30 mins to 1 hour	5K run	Moderate	9+	1	Soft and formed (like peanut butter)	2200
2016-09-12 22:35:00	2016-09-12 22:35:00	314	1009	20160816	2016-08-16	500	Ham Cheese Omelet		All of it	Cheeseburger, Fries		All of it	Pizza		All of it	None	Bottled water	Base purified water						Fruit juice			Good										30 mins to 1 hour	PRT	Moderate	9+	1	Soft and formed (like peanut butter)	2200
2016-09-12 23:15:00	2016-09-12 23:15:00	2418	1009	20160817	2016-08-17	500	Waffle		All of it	Hot Dog, Fries		All of it	Grilled Pork Chop, Rice		All of it	None	Bottled water	Base purified water						Fruit juice			Good										30 mins to 1 hour	2 mile rum	Moderate	9+	1	Soft and formed (like peanut butter)	2230
2016-09-12 23:20:00	2016-09-12 23:20:00	288	1009	20160818	2016-08-18	500	Scrambled Eggs, Toast		All of it	Beefaroni		All of it	Chicken Fajita		All of it	None	Bottled water	Base purified water						Fruit juice			Good										30 mins to 1 hour	PRT	Moderate	9+	1	Soft and formed (like peanut butter)	2200
2016-09-25 20:50:00	2016-09-25 20:50:00	115	1009	20160823	2016-08-23	500	Scrambled Eggs, Bacon		All of it	Fried Chicken, Mashed Potatoes		All of it	Grilled Pork, Mashed Potatoes		All of it	None	Bottled water	Base purified water						Fruit juice			Good										30 mins to 1 hour	PRT	Moderate	9+	1	Soft and formed (like peanut butter)	2200
2016-09-25 20:52:00	2016-09-25 20:52:00	149	1009	20160824	2016-08-24	500	Ham Cheese Omelet? Hashbrown		All of it	Chicken Vega, Rice		All of it	Pork Chalupa		All of it	None	Bottled water	Base purified water			Sports energy drink (e.g. Gatorade)			Fruit juice			Good										30 mins to 1 hour	5K run	Moderate	9+	1	Soft and formed (like peanut butter)	2200
2016-09-25 20:54:00	2016-09-25 20:54:00	121	1009	20160825	2016-08-25	500	Ham Cheese Omelet, Bacon		All of it	Steak, Lobster Tail, Fries		All of it	Fried Catfish, Fries		All of it	None	Bottled water	Base purified water			Sports energy drink (e.g. Gatorade)			Fruit juice			Good										30 mins to 1 hour	PRT	Moderate	9+	1	Soft and formed (like peanut butter)	2200
2016-09-25 21:05:00	2016-09-25 21:05:00	629	1009	20160826	2016-08-26	500	Scrambled Eggs, Bacon		All of it	Chicken Cordon Bleu, Mashed Potatoes		All of it	Cheese Burger, Fries		3/4 of it	None	Bottled water	Base purified water						Fruit juice			Good										Less than 30 mins	2 mile run	Moderate	9+	1	Soft and formed (like peanut butter)	2200
2016-03-10 12:10:00	2016-03-11 08:30:00	439	1011	3032016	2016-03-03	515	Protein Meal Shake	d2a06304-9031-4b5c-9004-1b582473b40e.jpg	All of it	Protein Meal Shake		All of it	Meal Shake		All of it	0	Bottled water							Fruit juice			Good									None	30 mins to 1 hour	Running and weight training	Challenging	2019-02-01	1	Hard and formed (like a cigar)	2200
2016-03-10 12:17:00	2016-03-11 08:30:00	380	1011	3042016	2016-03-04	515	Meal Shake		All of it	Meal Shake		All of it	Salad		3/4 of it	0	Bottled water	Base purified water						Fruit juice			Good									None	30 mins to 1 hour		Challenging	2019-05-03	2	Hard and formed (like a cigar)	2300
2016-03-10 12:20:00	2016-03-11 08:30:00	194	1011	3052016	2016-03-05	515	Veggie Shake		All of it	Veggie Shake		All of it	Protein Shake		All of it		Bottled water	Base purified water			Sports energy drink (e.g. Gatorade)		Milk	Fruit juice			Good									None	30 mins to 1 hour	Running. Muscle endurance	Challenging	2019-05-03	1	Hard and formed (like a cigar)	2300
2016-03-10 12:22:00	2016-03-11 08:30:00	142	1011	3062016	2016-03-06	515	Protein Shake		All of it	Protein Shake		All of it	Veggie Shake		All of it		Bottled water	Base purified water			Sports energy drink (e.g. Gatorade)			Fruit juice			Good									None	1 to 2 hours	Running	Challenging	2019-05-03	1	Hard and formed (like a cigar)	2200
2016-03-10 12:27:00	2016-03-11 08:30:00	288	1011	3072016	2016-03-07	515	Eggs And Wheat Toast		3/4 of it	Grilled Chicken Salad		All of it	Grilled Chicken Salad		All of it		Bottled water	Base purified water			Sports energy drink (e.g. Gatorade)		Milk				Good									None	30 mins to 1 hour		Challenging	2019-05-03	2	Hard and formed (like a cigar)	2200
2016-03-10 12:30:00	2016-03-11 08:30:00	198	1011	3082016	2016-03-08	515	Eggs Waffles		All of it	Chicken Wrap		3/4 of it	Protein Shake		All of it		Bottled water	Base purified water					Milk				Good										30 mins to 1 hour		Very Challenging	2019-05-03	2	Hard and formed (like a cigar)	2200
2016-03-11 08:27:00	2016-03-11 08:30:00	61790	1011	3092016	2016-03-09	515	Strawberry Meal Shake		All of it	Chicken Salad		3/4 of it	Chicken Wrap		All of it		Bottled water	Base purified water					Milk	Fruit juice			Good									None				2019-02-01	1	Soft and formed (like peanut butter)	2300
2016-03-20 21:33:00	2016-03-20 21:33:00	113	1011	3112016	2016-03-11	515	Nothing			Salad		3/4 of it	Salad		All of it	0	Bottled water				Sports energy drink (e.g. Gatorade)			Fruit juice			Good													2019-05-03	0		NA
1970-01-01 09:03:00	2016-03-11 23:40:00	3909	1012	20160309	2016-03-09	515	Egg Whites With Salsa, Bacon, Oatmeal With Walnuts, Coconut Shavings, Orange Juice And A Cup Of Black Coffee With Sweetener		All of it	Chicken Breast, Bell Pepper, Spinach, Tomato, Pasta With Select Veggies With Italian Dressing		3/4 of it	Chicken Breast, Same Pasta From Lunch, Grilled Onions		All of it	3small pieces of chocolat, red apple, flavored yogurt	Bottled water					Coffee or tea		Fruit juice	Yogurt		Good			Headache			Rash			Doxycycline	2+ hours	Weights and cardio	Very Challenging	2019-09-06	3	Soft and formed (like peanut butter)	2100
1970-01-02 09:47:00	2016-03-11 23:40:00	89054	1012	20160310	2016-03-10	515	Bacon Egg White Salsa Oatmeal Walnut Orange Juice		All of it	Guacamole Bell Pepper Onion Orange Juice Chicken Breast		3/4 of it	Chicken Breast Onion Bell Pepper Watermelon Salsa		All of it	Small chocolates Nestle	Bottled water				Sports energy drink (e.g. Gatorade)	Coffee or tea		Fruit juice			Good						Rash			Doxy	2+ hours	Cardio and weights	Moderate	2019-09-06	3	Soft and formed (like peanut butter)	2200
1970-01-02 20:39:00	2016-03-11 23:40:00	39106	1012	20160311	2016-03-11	515	Bacon Egg White Salsa Walnut Oatmeal Minced Ham		All of it	Jumbalya Stewed Tomatoes Asparagus Guava		1/2 of it	Chicken Breast Onion Bell Pepper Coleslaw		3/4 of it	Banana peanut butter small chocolate	Bottled water				Sports energy drink (e.g. Gatorade)	Coffee or tea		Fruit juice			Good					Runny or blocked nose	Rash			Doxy loratadin multivitamin	30 mins to 1 hour	Run weights	Moderate	2019-09-06	1	Soft and formed (like peanut butter)	2238
2016-03-13 00:04:00	2016-03-13 00:04:00	54571	1012	20160312	2016-03-12	730	Egg White Salsa Oatmeal Walnut Raisan Cranraisan Coconut Bacon		All of it	6inch Subway Italian Sub Honey Mustard Onion Banana Pepers Baked Lays Plain		All of it	Blackbean Hamburger Romain Lettuce Bell Pepper Olives Cottage Cheese Pineapple		3/4 of it	Banana peanut butter strawberry yoghurt raw coconut water from coconut	Bottled water					Coffee or tea		Fruit juice	Yogurt		Good						Rash			Doxy supplement	30 mins to 1 hour	Cardio	Challenging	2019-09-06	3	Soft and formed (like peanut butter)	2300
2016-03-14 09:04:00	2016-03-16 22:23:00	115195	1012	2060313	2016-03-13	830	Banana And Peanut Butter		All of it	Italian Subway Sandwich With Bbq Chips Bell Pepper Onions Cucumber Tomato		All of it	Chicken Breast Doritos Ruffles Salsa Hamburger No Bun		All of it	None	Bottled water										Good						Rash			Doxy claritin supplement	30 mins to 1 hour	Cardio	Moderate	2019-05-03	1	Hard and formed (like a cigar)	2130
2016-03-15 09:20:00	2016-03-16 22:23:00	87380	1012	20160314	2016-03-14	515	Egg White Jalepeno Ham Salsa Oatmeal Walnut Coconut Cranraisans		3/4 of it	Chicken Breast Bell Pepper Olives Macarroni Salad		3/4 of it	Veggie Burger No Bun Bell Pepper		All of it	Oreos small chocolates	Bottled water					Coffee or tea		Fruit juice			Good						Rash			Doxy claritin supplement	2+ hours	Cardio weights	Challenging	2019-09-06	2	Soft and formed (like peanut butter)	2200
2016-03-16 09:48:00	2016-03-16 22:23:00	88077	1012	20160315	2016-03-15	515	Egg White Omlet With Ham Bacon And Onion With Salsa		All of it		b8773eab-698c-4b12-9bf7-e6d5693085e1.jpg	All of it	Veggie Burger No Bun Bell Pepper		3/4 of it	Nut and fruit bar chocolates	Bottled water					Coffee or tea	Milk	Fruit juice			Good						Rash			Doxy claritin supplement	30 mins to 1 hour	Cardio weights	Moderate	2019-09-06	2	Soft and formed (like peanut butter)	2130
2016-03-16 22:23:00	2016-03-16 22:23:00	45289	1012	20160316	2016-03-16	515	Oatmeal Coconut Raisan Cranraisan Egg White Bacon Papaya Salsa	b6d35012-a666-4ad1-a6af-8e9483a9cfd1.jpg	All of it	Chicken Bell Pepper Tomato Cucumber Olives Sunflower Seeds Onions Watermelon		All of it	Subway Turkey And Ham On Wheat Cheeseits		All of it	Chocolates cheeseits fruit n nut bar	Bottled water					Coffee or tea		Fruit juice			Good						Rash			Doxy claritin supplement	30 mins to 1 hour	Stretch weights cardio	Challenging	2019-09-06	3	Soft and formed (like peanut butter)	2130
2016-03-17 22:12:00	2016-03-17 22:12:00	85726	1012	20160317	2016-03-17	515	Oatmeal With Raisans Coconut Walnut Eggs Onion Jalepeno Bell Pepper Tomato Ham Bacon Platano Salsa	a60dc473-5fa4-4bb7-ae4f-746f783f7aae.jpg	3/4 of it	Chicken Onion Bell Pepper Guacamole Sunflower Seeds Papaya Ham Spinach		3/4 of it	Stuffed Bell Pepper Ham Bell Pepper Watermelon Black Eyed Peas Salsa		All of it	Chocolates banana	Bottled water					Coffee or tea		Fruit juice			Good						Rash			Doxy claritin supplement	1 to 2 hours	Run cardio weights	Challenging	2019-09-06	3	Soft and formed (like peanut butter)	2130
2016-03-19 08:29:00	2016-03-19 08:29:00	123446	1012	20160318	2016-03-18	515		4d95e638-1be9-4227-8b8e-0ad11a772c09.jpg	3/4 of it		0526d9ee-4902-4434-b2c6-4d8934ff67d9.jpg	3/4 of it	Yogurt Cheeseits		All of it	Chocolates	Bottled water	Base purified water				Coffee or tea		Fruit juice	Yogurt		Good						Rash			Doxy claritin supplement	30 mins to 1 hour	Cardio weight	Moderate	9+	2	Soft and formed (like peanut butter)	2330
2016-03-20 14:08:00	2016-03-20 14:08:00	106718	1012	20160319	2016-03-19	600		3ff56e46-d0ed-41a6-a8ec-c59f757636ef.jpg		Fish Rice Beans Pineapple Carrots Green Beans		All of it	Yogurt		All of it	Chicolates fruit n nut bar sunflower seeds	Bottled water					Coffee or tea		Fruit juice	Yogurt	Beer, wine, or spirits	Good						Rash			Doxy claritin supplement	Less than 30 mins	Hiking	Moderate	2019-05-03	2	Soft and formed (like peanut butter)	2000
2016-03-21 14:40:00	2016-03-25 21:46:00	88321	1012	20160380	2016-03-20	700	Pancakes And Fried Eggs		All of it	Subway Spicy Italian On Wheat W Honey Mustard Bell Pepper Onion Tomato Bansna Peppers		All of it			All of it	Chocolate blueberrys cheeseits brownie chips	Bottled water					Coffee or tea		Fruit juice			Good						Rash			Doxy claritin supplement	30 mins to 1 hour	Cardio weight	Challenging	2019-09-06	2	Hard and formed (like a cigar)	2130
2016-03-22 09:25:00	2016-03-25 21:46:00	67517	1012	20160321	2016-03-21	515	Egg White Salsa Bacon		All of it		5155488a-e0a6-466a-8f7c-d83f1173a7e3.jpg		Chicken Cottage Cheese Onions Bell Pepper		3/4 of it	Chicolates cheeseits brownies	Bottled water	Base purified water				Coffee or tea		Fruit juice			Good						Rash			Doxy claritin supplement	30 mins to 1 hour	Cardio weights	Moderate	2019-09-06	1	Soft and formed (like peanut butter)	2100
2016-03-23 14:45:00	2016-03-25 21:46:00	105578	1012	20160322	2016-03-22	515	Yogurt Protein Shake Payday Bite		All of it	Chicken Bell Pepper Cottage Cheese Green Olives		All of it	Chicken Cottage Cheese		All of it	Chocolate brownie banana peanutbutter	Bottled water					Coffee or tea		Fruit juice	Yogurt		Good						Rash			Doxy claritin supplement	30 mins to 1 hour	Weights	Moderate	2019-09-06	2	Soft and formed (like peanut butter)	2000
2016-03-24 11:06:00	2016-03-25 21:46:00	73231	1012	20160323	2016-03-23	515	Egg White Bell Pepper Ham Jalepeno Bacon Oatmeal Walnut Coconut		3/4 of it		70768f50-4d3f-4e99-819d-a06d921b2847.jpg	All of it	Chicken Sunflower Seeds Pasta With Veggies		All of it		Bottled water	Base purified water				Coffee or tea		Fruit juice			Good						Rash			Doxy claritin supplement	30 mins to 1 hour	Weights cardio	Moderate	2019-09-06	2	Soft and formed (like peanut butter)	2200
2016-03-25 21:46:00	2016-03-25 21:46:00	124839	1012	20160324	2016-03-24	515	Oatmeal Coconut Walnut Raisans Eggwhite Salsa Bacon		3/4 of it	Beggie Burger Tomato Salad	0a8dd25f-6043-4beb-8fe1-6620e86c9e05.jpg	All of it	Chicken Bell Pepper		All of it	Cookie chocolate banana peanut butter	Bottled water	Base purified water				Coffee or tea	Milk	Fruit juice			Good						Rash			Doxy claritin supplement	30 mins to 1 hour	Cardio weights	Very Challenging	2019-09-06	2	Hard and formed (like a cigar)	2100
2016-03-25 21:50:00	2016-03-25 21:50:00	218	1012	20160325	2016-03-25	600	Banana Mixed Nuts		All of it	Chicken Guava Bell Pepper		All of it	Chicken Cottage Cheese Bell Pepper		All of it	Cheeseits chocolate cookies	Bottled water	Base purified water									Good						Rash			Doxy claritin supplement	30 mins to 1 hour	Cardio	Moderate	2019-05-03	2	Soft and formed (like peanut butter)	2200
2016-03-28 09:18:00	2016-03-28 09:18:00	84162	1012	20160327	2016-03-27	700	Banana Peanut Butter Cookies		All of it	Stewed Beef Rice With Corn And Creme Filled Donut		All of it	Subway Sandwich Turkey Ham Tomato Bell Pepper Onion Cucumber Banana Peppers		All of it	Cheeseits chocolate cookies	Bottled water					Coffee or tea					Good						Rash			Doxy claritin supplement	30 mins to 1 hour	Weights cardio	Moderate	2019-05-03	2	Soft and formed (like peanut butter)	2100
2016-03-28 22:52:00	2016-03-30 09:05:00	48877	1012	20160328	2016-03-28	515	Eggs Salsa Oatmeal Walmut Coconut Bacon		All of it	Chicken Macarroni Salad Watermelon		All of it	Ham Turkey Tomato Cucumber Bell Pepper Subway Sandwich Cheesits		All of it	Xhicolates	Bottled water	Base purified water				Coffee or tea					Good						Rash			Doxy claritin supplement	30 mins to 1 hour	Cardio weights	Challenging	2019-09-06	2	Soft and formed (like peanut butter)	2200
2016-03-30 09:05:00	2016-03-30 09:05:00	123137	1012	20160329	2016-03-29	515	Oatmeal Coconut Walmut Raisan Egg White Salsa Bacon		3/4 of it	Vegie Burger Onions Bell Pepper		All of it	Pork Ribs Rice Beans Salsa		All of it	Chicolates	Bottled water	Base purified water				Coffee or tea		Fruit juice			Good						Rash			Doxy claritin supplement	30 mins to 1 hour	Strength cardio	Moderate	2019-09-06	2	Hard and formed (like a cigar)	2130
2016-04-02 08:47:00	2016-04-02 08:47:00	258115	1012	20160401	2016-04-01	515	Egg White With Salsa Oatmeal Coconut Walnut Raisan		3/4 of it	Spicy Italian Subway Sub With Onions Banana Peppers Cucumber Tomato		All of it	Mixed Nuts N Dry Fruit Fruit N Nut Bar		All of it		Bottled water	Base purified water				Coffee or tea		Fruit juice			Good						Rash			Doxy claritin supplement	Less than 30 mins	Cardio	Moderate	2019-05-03	2	Hard and formed (like a cigar)	2340
2016-04-03 17:26:00	2016-04-03 17:26:00	117547	1012	20160402	2016-04-02	630	Fruit N Nut Bar		All of it	Subway Spicy Italian Onion Tomato Cucumber Banana Peppers		All of it	Subway Turkey Ham Tomato Bell Pepper Cucumber Onion Bansna Pepper		All of it	Cheeseits fruit n nut bar	Bottled water							Fruit juice			Good						Rash	Muscle strain		Doxy claritin supplement	1 to 2 hours	Cardio weights	Moderate	2019-09-06	2	Hard and formed (like a cigar)	2200
2016-04-04 09:20:00	2016-04-04 09:20:00	57262	1012	20160403	2016-04-03	730	Bacon Crepes Cantelope Papaya Eggs Banana		All of it	Subway Turkey Ham Tomato Bell Pepper Onion Cucumber Banana Peppers		All of it	Tuna Sandwich With Pickles Tomato Bell Pepper Black Olives		All of it	Mixed nuts	Bottled water					Coffee or tea					Good						Rash			Doxy claritin supplements hydrocortizone	Less than 30 mins	Weights	Moderate	2019-09-06	2	Soft and formed (like peanut butter)	2230
2016-04-05 23:47:00	2016-04-05 23:47:00	138433	1012	20160405	2016-04-05	515		42a95f84-9c78-41b9-83fa-58d072e68b47.jpg	All of it	Cheeseits Banana Protein Shake		All of it	Beefpatty Bacon Bell Pepper Kiwi Cottage Cheese Salsa		All of it	Fruit nut bar banana	Bottled water	Base purified water			Sports energy drink (e.g. Gatorade)	Coffee or tea		Fruit juice	Yogurt		Good						Rash			Doxy claritin supplement	30 mins to 1 hour	Cardio weights	Moderate	2019-09-06	1	Hard and formed (like a cigar)	2200
2016-04-09 08:10:00	2016-04-12 22:37:00	289335	1012	20160406	2016-04-06	515	Iatmeal Walnut Coconut Bacon Egg White Salsa		1/2 of it	Chicken Bell Pepper Olives		All of it	Chicken		All of it	Cheeseits chicolates	Bottled water	Base purified water				Coffee or tea		Fruit juice			Good						Rash			Doxy claritin supplement	30 mins to 1 hour	Cardio weights	Moderate	9+	3	Soft and formed (like peanut butter)	2200
2016-04-09 08:21:00	2016-04-12 22:37:00	661	1012	20160408	2016-04-08	515	Egg White Salsa Jalepeno Bell Pepper Ham Bacon		3/4 of it	Chicken Bell Pepper		All of it	Turkey Roastbeef Timato Bell Pepper Onion Sandwich		All of it	Crackers fruit n nut bar	Bottled water	Base purified water			Sports energy drink (e.g. Gatorade)	Coffee or tea		Fruit juice			Good						Rash			Doxy claritin supplement	1 to 2 hours	Cardio weights	Challenging	2019-09-06	2	Soft and formed (like peanut butter)	2230
2016-04-11 11:03:00	2016-04-12 22:37:00	182535	1012	20160409	2016-04-09	500		7a8e883d-a712-4012-b0bb-d19ce90b9813.jpg			40bfdcec-9bbf-4035-9a80-3bce2c19f323.jpg		Spicy Italiansub		All of it	Fruit n nut bar	Bottled water	Base purified water				Coffee or tea					Good						Rash			Doxy claritin supplement	Less than 30 mins		Easy	2019-05-03	1	Soft and formed (like peanut butter)	230
2016-04-12 22:37:00	2016-04-12 22:37:00	127998	1012	20160412	2016-04-12	523	Oatmeal Coconut Raisan Walmut Egg White	051ee5c3-d146-4427-b9f9-4e37bc547369.jpg	3/4 of it	Chicken Tortilla Soup		3/4 of it	Chicken Cottage Sheese		All of it	Rice chips fruit n nut bar	Bottled water	Base purified water			Sports energy drink (e.g. Gatorade)	Coffee or tea		Fruit juice			Good						Rash			Doxy supplement claritin	Less than 30 mins	Weights	Challenging	2019-09-06	3	Soft and formed (like peanut butter)	2200
2016-04-14 09:11:00	2016-04-14 09:11:00	124438	1012	20160413	2016-04-13	508	Egf White Jalepeno Ham Bell Pepper Bacon		All of it	Gyro Meat Xoleslaw Cottage Cheese Salsa		All of it	Turkey And Ham Subway Spinach Tomato Bell Pepper Cucumber Banana Peppers		All of it	Fruit nut bar	Bottled water	Base purified water			Sports energy drink (e.g. Gatorade)	Coffee or tea					Good						Rash			Doxy claritin supplement hydrocortizone	30 mins to 1 hour	Cardio	Moderate	2019-09-06	2	Soft and formed (like peanut butter)	2130
2016-04-19 08:57:00	2016-04-21 07:18:00	80942	1012	201604118	2016-04-18	510	Oatmeal Walnut Raisan Coconut Egg White Cantelope		3/4 of it		01801490-bf91-4a0e-b8a0-8a9e83a714be.jpg	All of it	Veggie Burger Onions Bell Pepper Lettuce		All of it	Rice chips	Bottled water	Base purified water				Coffee or tea		Fruit juice			Good						Rash			Doxy claritin supplement	30 mins to 1 hour	Weights cardio	Challenging	2019-09-06	2	Soft and formed (like peanut butter)	2130
2016-04-21 07:18:00	2016-04-21 07:18:00	166852	1012	20160419	2016-04-19	510	Oatmeal Coxonut Walnut Raisans Egg White Cottage Cheese		3/4 of it		34d42c62-a7d5-4d44-8dc4-d0f21f4355aa.jpg	All of it					Bottled water	Base purified water				Coffee or tea					Good						Rash			Doxy claritin supplement	Less than 30 mins	Cardio	Moderate	2019-09-06	2	Hard and formed (like a cigar)	2100
2016-04-21 07:21:00	2016-04-21 07:21:00	161	1012	20160420	2016-04-20	445	Oatmeal Walnut Coconut Raisans Egg White		3/4 of it	Spicy Italian Subway Tomato Cucumber Onions Banana Pepper		All of it	Veggie Burger Patty Cittage Cheese Bell Peoper		1/2 of it	Banana peanut butter rice chips	Bottled water	Base purified water				Coffee or tea		Fruit juice			Good						Rash				Less than 30 mins	Cardio	Challenging	2019-09-06	2	Hard and formed (like a cigar)	2130
2016-04-22 13:14:00	2016-04-26 09:26:00	107586	1012	20160421	2016-04-21	445	Oatmeal Walnut Coconut Ham Cheese Omlete Salsa		3/4 of it	Turkey Guacamole Bell Pepper Onion Cucumber Sub		All of it	Spicy Italian Subway Tomato Cucumber Bell Pepper Banana Peppers		All of it	Rice chips fruit n nut bar	Bottled water	Base purified water				Coffee or tea			Yogurt	Beer, wine, or spirits	Good						Rash			Doxy claritin supplement hydrocortizone	Less than 30 mins		Moderate	2019-09-06	1	Hard and formed (like a cigar)	2330
2016-04-25 10:03:00	2016-04-26 09:26:00	247709	1012	20160422	2016-04-22	800	Fruit N Nut Bar Yoghurt		All of it	Bean Patty Onion Bell Pepper Sunflower Seeds Macarroni Salad		3/4 of it					Bottled water					Coffee or tea		Fruit juice			Good			Headache	Tiredness		Rash			Docy supplement claritin				2019-09-06	3	Soft and formed (like peanut butter)	2300
2016-04-26 09:25:00	2016-04-26 09:26:00	84173	1012	20160425	2016-04-25	515		9e9ab787-c448-4c29-8e1e-064df2940e59.jpg	3/4 of it		f00e1d25-0ace-4e1c-adfb-2276a218a0db.jpg	All of it	Salmon Ruce Squash		1/2 of it	Tuna	Bottled water	Base purified water				Coffee or tea		Fruit juice	Yogurt	Beer, wine, or spirits	Good						Rash			Doxy benadril supplement	30 mins to 1 hour			2019-09-06	2	Hard and formed (like a cigar)	2200
2016-04-27 10:59:00	2016-04-27 22:41:00	92010	1012	20160426	2016-04-26	515	Eggs Bacon Patmeal Coconut Walnut Raisans		All of it		e64560e7-eeeb-408f-8bc7-c71f3eadc1ea.jpg	All of it	Chicken Brown Rice Salsa		All of it	Chicilate	Bottled water	Base purified water			Sports energy drink (e.g. Gatorade)	Coffee or tea					Good						Rash	Muscle strain		Doxy supplement benadril	1 to 2 hours	Weights cardio	Moderate	2019-09-06	2	Soft and formed (like peanut butter)	2200
2016-04-27 22:41:00	2016-04-27 22:41:00	335	1012	20160427	2016-04-27	515	Oarmeal Coconut Raisans Walnut Eggs		All of it	Chicken Onion Pepper Cottage Cheese		All of it	Salami Bell Pwpper Onion Banana Pepper Cucumber		All of it	Chocolates apple	Bottled water	Base purified water			Sports energy drink (e.g. Gatorade)	Coffee or tea					Good						Rash	Muscle strain		Doxy supplement benadril	1 to 2 hours	Cardio weights	Challenging	2019-09-06	1	Soft and formed (like peanut butter)	2130
2016-05-02 09:36:00	2016-05-02 09:36:00	384891	1012	20160501	2016-05-01	900	Turkey Sandwich Tomato Bell Pepper Bananapepper Pickes Mayo		All of it	Turkey Sandwich Bell Pepper Tomato Cucumber Vell Pepper Mustard		All of it	Rice Chips Chicolates Yoghurt		All of it		Bottled water				Sports energy drink (e.g. Gatorade)				Yogurt		Good						Rash	Muscle strain		Doxy claritin supplement				2019-05-03	1	Soft and formed (like peanut butter)	2200
2016-05-04 09:17:00	2016-05-04 09:18:00	171695	1012	20130503	2016-05-03	515	Grits Eggs Cottage Cheese		All of it	Chcken Bell Pepper Cottage Cheese		All of it	Spicy Italian Subway Cucumber Tomato Bell Pepper Pickles Banana Peppers		All of it	Cheeseits chicolates mango	Bottled water	Base purified water			Sports energy drink (e.g. Gatorade)	Coffee or tea					Good						Rash	Muscle strain		Doxt supplement benadril	30 mins to 1 hour	Weights		2019-05-03	1	Soft and formed (like peanut butter)	2130
2016-05-06 10:20:00	2016-05-10 00:38:00	162762	1012	20160504	2016-05-04	515	Oatmeal Walnut Coconut Raisan Eggs Bacon Salsa		All of it	Chicken Salsa Cottage Cheese		All of it	Spicy Italian Subway Cucumber Bell Peppers Tomato Banana Pappers Black Olives		All of it	Cheeseits banana	Bottled water	Base purified water				Coffee or tea					Good						Rash			Doxy supplement benebril	30 mins to 1 hour	Cardio weights		2019-09-06	3	Hard and formed (like a cigar)	2100
2016-05-06 10:24:00	2016-05-10 00:38:00	221	1012	20160505	2016-05-05	600	Eggs Bacon Oatmeal Walnut Coconut Raisan		3/4 of it	Chucken Roasted Potatoes Green Beans Onions Watermelon		3/4 of it	Veggie Burger Patties Salsa		3/4 of it	Chicolates banana tuna	Bottled water	Base purified water				Coffee or tea				Beer, wine, or spirits	Good						Rash			Doxy supplement claritin	Less than 30 mins	Weights		2019-09-06	1	Hard and formed (like a cigar)	30
2016-05-09 10:43:00	2016-05-10 00:38:00	260322	1012	20160508	2016-05-08	800	Pancakes Fruit N Nut Bar		All of it	Fried Chicken		All of it	Spicy Utalian Sub Bell Pepper Onions Banana Pepper Cucumber		All of it	Wheat thins rice chips	Bottled water				Sports energy drink (e.g. Gatorade)	Coffee or tea					Good						Rash			Doxy supplement motrin claritin	30 mins to 1 hour	Cardio	Moderate	2019-05-03	1	Hard and formed (like a cigar)	2200
2016-05-10 00:38:00	2016-05-10 00:38:00	50107	1012	20160509	2016-05-09	700	Oatmeal Walnut Covonut Raisan Friit N Nut Bar		3/4 of it	Cjicken Cottage Cheese Corn Coleslaw		1/2 of it	Subway Spicy Italian Bell Pepper Onion Banana Pepper Cucumber Cheese		All of it	Wheat thins	Bottled water	Base purified water			Sports energy drink (e.g. Gatorade)	Coffee or tea					Good						Rash			Doxy dupplement benedril hydrocotixome	30 mins to 1 hour	Weights cardio	Challenging	2019-05-03	1	Soft and formed (like peanut butter)	2230
2016-05-11 10:36:00	2016-05-11 10:36:00	122307	1012	20160510	2016-05-10	700	Casein Shake Wheatthins		All of it	Chicken Bell Pepper Lettuce Black Beans Olives		All of it				Chocolate fruit nut bar kettle chips	Bottled water	Base purified water			Sports energy drink (e.g. Gatorade)						Good						Rash			Doxy supplement benedril	30 mins to 1 hour	Weights cardio		2019-09-06	2	Soft and formed (like peanut butter)	2200
2016-05-12 10:37:00	2016-05-13 09:29:00	86458	1012	20160511	2016-05-11	515	Grits Eggs Salsa Cottage Cheese Bacon		All of it	Chicken Bell Pepper		All of it	Veal Parmesean Brown Rice Salsa Peas Mushrooms Saurkraut		3/4 of it	Reese cups wheatthins	Bottled water	Base purified water			Sports energy drink (e.g. Gatorade)	Coffee or tea					Good						Rash			Doxy supplement benedril hydrocortizone	1 to 2 hours	Weights cardio		2019-09-06	3	Soft and formed (like peanut butter)	2200
2016-05-13 09:29:00	2016-05-13 09:29:00	82308	1012	20160512	2016-05-12	500	Chocolate N Nut Bar Protein Shake Banana Almonds		All of it	Ham Turkey Bell Pepper Cucumber Tomato Onion Banana Pepper Subway		All of it	Same As Lunch		All of it	Wheattins almind jettle chips tuna	Bottled water	Base purified water			Sports energy drink (e.g. Gatorade)					Beer, wine, or spirits	Good						Rash			Doxy supplement venedril hydrocortizone	30 mins to 1 hour	Weights		9+	1	Hard and formed (like a cigar)	2230
2016-05-16 09:59:00	2016-05-24 22:54:00	260989	1012	20160513	2016-05-13	505	Chirizo Egg Potato Cheese Burrito Salsa		All of it							Wheatthins	Bottled water										Good						Rash			Doxy benedril supplement	Less than 30 mins	Cardio	Easy		1	Soft and formed (like peanut butter)	NA
2016-05-17 13:38:00	2016-06-01 09:31:00	99571	1012	20160516	2016-05-16	504	Egg Ham Jalepeno Salsa Bacon Oatmeal Coconut Walnut	db74b6e7-16a8-4988-9028-0de4539bb2e1.jpg	All of it	Chicken Bell Pepper		All of it	Spicy Utalin Subway Cucumber Tomato Bell Pepper Banana Pepper Inion Mayo		All of it	Wheat thins	Bottled water	Base purified water				Coffee or tea					Good									Doxy benedril supplement	30 mins to 1 hour	Cardio weights		2019-09-06	3	Soft and formed (like peanut butter)	2050
2016-05-18 10:38:00	2016-06-01 09:31:00	75578	1012	20160517	2016-05-17	504	Eggs Salsa Vacon Iatmeal Ciconut Ealnut Raisans		All of it	Turkey Patty Coleslaw Guacamole Brocolli	8ec245f5-a244-409b-83b0-d71312dfe58c.jpg	3/4 of it	Roastbeef Turkey Sub			Chicolate mango rice chips	Bottled water	Base purified water			Sports energy drink (e.g. Gatorade)	Coffee or tea					Good									Doxy supplement benedril pepcid ac	1 to 2 hours	Cardio weights		9+	2	Soft and formed (like peanut butter)	2200
2016-05-19 11:53:00	2016-06-01 09:31:00	90909	1012	20160518	2016-05-18	504	Eggs Salsa Bacon Iatmeal		3/4 of it		f9325adb-e1a9-4158-8105-b5058062667d.jpg		Roastbeef N Turkey Sub		All of it	Chocolate rice chips	Bottled water	Base purified water			Sports energy drink (e.g. Gatorade)	Coffee or tea				Beer, wine, or spirits	Good						Rash			Doxy supplement benedeil hydrocortizone	30 mins to 1 hour	Cardio n weights	Challenging	2019-09-06	2	Soft and formed (like peanut butter)	2200
2016-05-20 13:39:00	2016-06-01 09:31:00	92763	1012	20160519	2016-05-19	507	Rggs N Oatmeal		All of it	Chicken Asparagus Potato		All of it	Spicy Italian Subway Olives Tomato Cucumber Onion Banana Peppers		All of it	Rice chips fruit n nut bar wheat thins	Bottled water	Base purified water			Sports energy drink (e.g. Gatorade)	Coffee or tea					Good						Rash			Doxy supplement claritin hydrocortizone heartburn	30 mins to 1 hour	Cardio weughts	Moderate	2019-09-06	2	Soft and formed (like peanut butter)	2130
2016-05-24 22:54:00	2016-05-24 22:54:00	177	1012	20160524	2016-05-24	507	Protein Shake Almonds Peanutbutter		All of it	Chicken Bell Pepper Inion Cottage Cheese Cucumbers Olives		All of it	Tuna Sandwich		All of it	Nut bar chicolate apple cheeseits	Bottled water	Base purified water			Sports energy drink (e.g. Gatorade)						Good						Rash			Doxy supplement claritin	30 mins to 1 hour	Weights	Challenging	2019-09-06	1	Soft and formed (like peanut butter)	2200
2016-06-01 09:31:00	2016-06-01 09:31:00	643043	1012	20160531	2016-05-31	507	Eggs Bacon Oatmeal		1/2 of it	Roast Beef Corn Green Beans Kiwi Vell Pepper		All of it	Ham Turkey Sandwich Tomato Bell Peoper Pickles Onions Banana Peppers Mayo Mustard		All of it	Mango chicolates	Bottled water	Base purified water				Coffee or tea					Good						Rash			Doxy supplement	30 mins to 1 hour	Weights		2019-09-06	4	Loose and unformed (like a thick milkshake)	2030
2016-06-02 11:24:00	2016-06-09 09:40:00	93159	1012	20160601	2016-06-01	507	Eggs Salsa Cheese Ham Grits		All of it	Turkey Ham Sandwich		All of it	Chicken Inions Bell Pepper Cookie		All of it	Chicolates	Bottled water	Base purified water				Coffee or tea					Good		Gastrointestinal issues				Rash			Doxy supplement	Less than 30 mins	Ran	Moderate	2019-09-06	4	Loose and unformed (like a thick milkshake)	2200
2016-06-06 09:51:00	2016-06-09 09:40:00	178	1012	20160605	2016-06-05	800	Whaet Thins		All of it	Subway Spicy Italian Sub Tomato Bell Papper Spinach Onion Olives Mustard		All of it	Same As Lunch		All of it	Wheat thins chocilat	Bottled water	Base purified water			Sports energy drink (e.g. Gatorade)					Beer, wine, or spirits	Good						Rash			Supplemet	1 to 2 hours	Weights cardio	Challenging	2019-09-06	1	Hard and formed (like a cigar)	2200
2016-06-07 15:39:00	2016-06-09 09:40:00	107261	1012	20160606	2016-06-06	507	Eggs Bacon Salsa Oatmeal		3/4 of it	Chucken Bellboepper Inion		All of it	Spicy Italian Subway Bell Pepper Onion Banana Papper Spinach		All of it	Vhicolates cheeseits	Bottled water	Base purified water			Sports energy drink (e.g. Gatorade)	Coffee or tea					Good						Rash			Dixy supplement cortizone	1 to 2 hours	Cardio weights	Challenging	2019-09-06	2	Soft and formed (like peanut butter)	2200
2016-06-09 09:37:00	2016-06-09 09:40:00	151040	1012	20160607	2016-06-07	500	Eggs Salsa Cittage Cheese Cirned Beef Hash Iatmeal		3/4 of it	Chicken Bellpepper		All of it	Subway Spicy Italian Same As Testerday Dinner		All of it	Cheeseite	Bottled water	Base purified water			Sports energy drink (e.g. Gatorade)	Coffee or tea					Good						Rash			Doxy supplement		Weights	Moderate	2019-09-06	1	Soft and formed (like peanut butter)	2200
2016-06-09 09:40:00	2016-06-09 09:40:00	193	1012	20160608	2016-06-08	507	Eggs Bacon Salsa Iatmeal		All of it	Beef Inions Mushrooms Beans Watermelon		1/2 of it	Roastbeef And Turjey Subway		All of it	Cheeseuts wheatthuns chicolats	Bottled water	Base purified water			Sports energy drink (e.g. Gatorade)	Coffee or tea					Good						Rash			Doxy supplement cortizone	1 to 2 hours	Cardio weight	Very Challenging	2019-09-06	1	Hard and formed (like a cigar)	2200
2016-06-10 11:43:00	2016-07-07 10:48:00	93772	1012	20160609	2016-06-09	507	Egg Ham Salsa Cornedhash French Toast		All of it	Meat Pizza		All of it				Mango	Bottled water	Base purified water				Coffee or tea					Good						Rash			Doxy supplement cirtizine	Less than 30 mins	Cardio	Moderate	2019-09-06	1	Hard and formed (like a cigar)	2200
2016-06-13 10:47:00	2016-07-07 10:48:00	255875	1012	20160612	2016-06-12	700	None			Roast Beef Turkey Sub		All of it	See Lunch		All of it	Wheatthins	Bottled water	Base purified water			Sports energy drink (e.g. Gatorade)					Beer, wine, or spirits	Good						Rash			Doxy supplement	30 mins to 1 hour	Cardio weights	Moderate	2019-09-06	1	Hard and formed (like a cigar)	2200
2016-06-23 10:56:00	2016-07-07 10:48:00	70347	1012	20160622	2016-06-22	500	Eggs Ham Salsa Grits		3/4 of it	Chicken Cottage Cheese Corn Bbq Sauce		All of it	Turkey Roast Beef Subway Sandwich		All of it	Apple cheese	Bottled water	Base purified water			Sports energy drink (e.g. Gatorade)	Coffee or tea					Good						Rash			Doxy supplement glucosamine	1 to 2 hours	Weights cardio	Moderate	2019-09-06	1	Hard and formed (like a cigar)	2040
2016-06-24 10:36:00	2016-07-07 10:48:00	85256	1012	20160623	2016-06-23	507	Eggs Salsa Bacon Grits Peanutbutter		All of it	Turkey Roastbeef Subway		All of it	Cheese Chicolate Chips		All of it	Wheatthins	Bottled water				Sports energy drink (e.g. Gatorade)	Coffee or tea				Beer, wine, or spirits	Good						Rash			Doxy glucosamine	1 to 2 hours	Cardio	Challenging	2019-09-06	2	Hard and formed (like a cigar)	2300
2016-07-07 10:48:00	2016-07-07 10:48:00	62408	1012	20160706	2016-07-06	510	Eggs Salsa Cottage Cheese Banana		All of it	Roast Beef N Ham Sandwich		All of it	Tuna Sandwich			Chocolates cheeseits	Bottled water	Base purified water				Coffee or tea					Good				Tiredness		Rash			Doxy supplement cortizone				2019-09-06	1	Hard and formed (like a cigar)	2300
2016-07-08 17:38:00	2016-07-08 17:38:00	110995	1012	20160707	2016-07-07	645	Eggs Salsa Cottage Cheese Banana		All of it	Tuna Sandwich		All of it	Chicken N Bacon Sandwich		All of it	Chicolate nut bar crackers	Bottled water	Base purified water				Coffee or tea					Good						Rash	Muscle strain		Dixy supplement cortizone				2019-09-06	1	Soft and formed (like peanut butter)	2210
2016-07-14 15:45:00	2016-10-04 22:29:00	511619	1012	20160708	2016-07-08	510	Eggs Banana		All of it	Chicken N Bacon Sandwich		All of it				Crackers chocholate but bar choclates	Bottled water	Base purified water				Coffee or tea					Good						Rash	Muscle strain		Doxy supplement cortizone				2019-09-06	2	Soft and formed (like peanut butter)	2200
2016-07-29 12:41:00	2016-10-04 22:29:00	335326	1012	20160725	2016-07-25	500	Cottage Cheese Salsa Eggs Grits		All of it	Chicken Carrots Corn Cottage Cheese		All of it					Bottled water					Coffee or tea					Good									Doxy glucosamine loratadine	30 mins to 1 hour	Cardio weights		2019-09-06	2	Hard and formed (like a cigar)	2200
2016-08-12 10:36:00	2016-10-04 22:29:00	166	1012	20160811	2016-08-11	505	Grits Eggs Salsa Sausage		All of it	Chicken Avocado Cottage Cheese		All of it	Teryaki Chicken Sandwich		All of it	Wheatthins chocolate	Bottled water				Sports energy drink (e.g. Gatorade)	Coffee or tea				Beer, wine, or spirits	Good									Doxy glucosamine supplement	30 mins to 1 hour	Weights run	Moderate	2019-09-06	2	Soft and formed (like peanut butter)	2330
2016-08-13 10:47:00	2016-10-04 22:29:00	87071	1012	20160812	2016-08-12	715	Oatmeal		All of it	Roastbeef Sandwich		All of it	Roastbeef Sandwich		All of it	Wheattins chicolate	Bottled water				Sports energy drink (e.g. Gatorade)	Coffee or tea				Beer, wine, or spirits	Good									Doxy glucosamine claritin supplement				2019-05-03	1	Hard and formed (like a cigar)	2300
2016-08-14 13:08:00	2016-10-04 22:29:00	94823	1012	20160813	2016-08-13	730	Oatmeal		All of it	Chicken Wrap		All of it	Pepperoni Pizza Abd Garlic Bread		All of it	Chocolate cheese crackers	Bottled water				Sports energy drink (e.g. Gatorade)					Beer, wine, or spirits	Good									Doxy supplement glucisamibr				2019-09-06	1	Hard and formed (like a cigar)	2200
2016-08-15 17:33:00	2016-10-04 22:29:00	102334	1012	20160814	2016-08-14	700	Pancakes Eggs French Toast		All of it	Chiken Wrap		All of it	Chucken Wrap		All of it	Beef jerket chiclate cheese crackers	Bottled water				Sports energy drink (e.g. Gatorade)	Coffee or tea					Good									Doxy supplements glucosamine	30 mins to 1 hour	Weights run		2019-09-06	1	Soft and formed (like peanut butter)	2200
2016-08-18 15:09:00	2016-10-04 22:29:00	250551	1012	20160817	2016-08-17	505	Grits Bacon Eggs		All of it	Chicken Corn Salsa		All of it	Roastbeef Salami Sandwich		All of it	Cheeseits chocolates pear	Bottled water					Coffee or tea					Good									claritin	1 to 2 hours	Weights run	Challenging	2019-09-06	1	Hard and formed (like a cigar)	2200
2016-11-11 21:01:00	2016-11-11 21:01:00	217	1014	10112014	2016-11-10	530	Almonds Yogurt		All of it	Ham Andcheese Watermelon Cukes Veggies		All of it	Steak Potatoes Gravy Veggies Cukes Tomatoes Watermelon		All of it	Chips	Bottled water				Sports energy drink (e.g. Gatorade)						Good				Tiredness	Runny or blocked nose					30 mins to 1 hour	Run	Very Challenging	2019-05-03	4	Soft and formed (like peanut butter)	2200
1970-01-01 00:27:00	2016-07-29 21:59:00	19083	1014	7072016	2016-07-07	545	Nutragrain And Cookies		All of it	Cake And Hord D Overs		All of it	Veal Cucubers Green Olives Tomatos Vegetables Ice Cream And Peach Cobbler		All of it	None	Bottled water				Sports energy drink (e.g. Gatorade)						Good									Imodium	30 mins to 1 hour	Run	Challenging	2019-05-03	1	Soft and formed (like peanut butter)	2100
1970-01-02 19:31:00	2016-07-29 22:00:00	268	1014	8072016	2016-07-08	530	Breakfast Bars		All of it	Veal Potatoes Cucumbers Tomatoes Peaches		All of it	Spagetti With Meatballs Garlic Toast Cucumbers Peaches		All of it	None	Bottled water				Sports energy drink (e.g. Gatorade)						Good									None	30 mins to 1 hour	Running	Challenging	2019-05-03	2	Soft and formed (like peanut butter)	2100
1970-01-02 19:26:00	2016-07-29 22:00:00	395	1014	9072016	2016-07-09	545	Breakfast Bars Cookies		All of it	Egg Salad Sandwhich Guava		All of it	BLT Sandwhich Yogurt Cucumbers Tomatos		All of it	None	Bottled water			Soda							Ill		Gastrointestinal issues							Imodium pepto bismal	Less than 30 mins	Walking	Moderate	2019-05-03	2	Loose and unformed (like a thick milkshake)	2100
1970-01-02 19:20:00	2016-07-29 22:00:00	39327	1014	11072016	2016-07-11	530	Pop Tarts And Gatorade		All of it	Meat Loaf Rice Green Beans Cucumbers Olives Corn		All of it	Pork Chop Potatoes And Gravy Cucumbers Macaroni Salad		All of it	Fig newtons 2	Bottled water				Sports energy drink (e.g. Gatorade)						Good		Gastrointestinal issues							Chloroquine	30 mins to 1 hour	Run	Very Challenging	2019-05-03	2	Soft and formed (like peanut butter)	2100
1970-01-03 18:00:00	2016-07-29 21:59:00	80949	1014	12072016	2016-07-12	523		fed0bb05-bed5-4f71-9c9e-317a60083fed.jpg	All of it		ef59681b-2ed4-4e30-86d3-356fa4e8c340.jpg	All of it	Beets Cucumbers Enchiladas Yogurt Boiled Egg Corn		All of it	Fig newtons	Bottled water				Sports energy drink (e.g. Gatorade)						Good		Gastrointestinal issues							None	30 mins to 1 hour	Running	Very Challenging	2019-05-03	2	Loose and unformed (like a thick milkshake)	2130
2016-07-13 17:46:00	2016-07-29 22:00:00	999999999	1014	7132016	2016-07-13	530		80fb68cd-a612-4061-856b-fce7382779d5.jpg	All of it		1d30a875-2e85-4290-8374-be9277aa5765.jpg	All of it																															NA
2016-07-14 21:17:00	2016-07-29 21:59:00	44086	1014	14072016	2016-07-14	531		86c32bb0-a22b-4c02-9cd3-1eb652d7ebb1.jpg	All of it	Tomatos Meatloaf Potatoes Olives Garbanzos Gravy Asparagus Ice Cream		All of it		998998ce-f9c8-45cb-b86f-7e71fc41185d.jpg	All of it	Ice cream	Bottled water				Sports energy drink (e.g. Gatorade)						Good									Probiotic lactobacilus	30 mins to 1 hour	Running	Very Challenging	2019-05-03	3	Soft and formed (like peanut butter)	2100
2016-07-19 22:15:00	2016-07-29 22:00:00	435522	1014	18072016	2016-07-18	520		78ac577b-dff7-4ced-8a1c-6d7555eb1c0a.jpg	All of it	Chicken Vegetables Tomatoes Yogurt		All of it	Tuna Sandwhich Chips		All of it	None	Bottled water			Soda							Good									Probiotic and chloroquine	30 mins to 1 hour	Run	Very Challenging	2019-09-06	3	Soft and formed (like peanut butter)	2300
2016-07-19 22:20:00	2016-07-29 22:00:00	288	1014	19072016	2016-07-19	530	Breakfast Bars 2 Nutrgrain		All of it	2 X Nutragrain Breakfast Bars Again		All of it	Teriaki Chicken Vegetables Rice Wontons And Noodles At Tegus Mall		All of it	Fig newtons and beef jerky	Bottled water			Soda	Sports energy drink (e.g. Gatorade)						Good									Probiotic	30 mins to 1 hour	Running	Challenging	2019-09-06	2	Hard and formed (like a cigar)	2130
2016-07-22 09:17:00	2016-07-29 22:00:00	212217	1014	20072016	2016-07-20	530		71b992f0-c857-49a2-a6eb-16261a18e4f8.jpg	All of it		8abbc9f0-1cb9-469b-9db7-33609989f956.jpg	All of it		aba7403d-0895-4b50-9724-0322198ac068.jpg	All of it	None	Bottled water				Sports energy drink (e.g. Gatorade)						Good									Probiotic	30 mins to 1 hour	Run	Challenging	2019-05-03	2	Soft and formed (like peanut butter)	2200
2016-07-23 07:49:00	2016-07-29 22:00:00	81109	1014	22072016	2016-07-22	510		257eed01-09ed-413a-be8e-fe8ffd29f2d0.jpg	All of it	Crab Salad Sandwhich Macaroni Salad Cucumbers Tomato		All of it	Chicken Rice And Beans		All of it	Goldfish crackers	Bottled water				Sports energy drink (e.g. Gatorade)						Good									None	Less than 30 mins	Running	Challenging	2019-05-03	3	Soft and formed (like peanut butter)	2200
2016-07-24 22:47:00	2016-07-29 22:00:00	140253	1014	23072016	2016-07-23	540	Poptarts X2		All of it	Salmon Loaf Cucumbers Tomatos Radish Cobbler And Ice Cream		All of it		a3efcfda-b769-41c1-bca3-df13703308c5.jpg	All of it	None	Bottled water				Sports energy drink (e.g. Gatorade)						Good									None	1 to 2 hours	Running	Very Challenging	2019-05-03	3	Soft and formed (like peanut butter)	2200
2016-07-24 22:51:00	2016-07-29 21:59:00	288	1014	24072016	2016-07-24	550	Chocolate Corn Flakes Lactose Free Milk And A Banana		All of it	Cheese And Mortdela Sandwiches And A Banana		All of it	Salisbury Steak Tomato Pickle Potatos And Gravy Mixed Vegetables Beets Radishes Cranberry Sauce And Yogurt		All of it	Goldfish crackers	Bottled water				Sports energy drink (e.g. Gatorade)						Good		Gastrointestinal issues							None	Less than 30 mins	Walk	Easy	2019-05-03	3	Loose and unformed (like a thick milkshake)	2130
2016-07-25 19:49:00	2016-07-29 21:59:00	75434	1014	25072016	2016-07-25	520	Coco Corn Flakes And A Banana Lactose Free Milk		All of it	Chicken Jello Macaroni Salad Tomatoes Radishes Cucumber Green Olives		All of it		ce75fcd8-d084-4814-a5d6-c389503e6022.jpg	All of it	Ice cream with walnuts	Bottled water										Good									Chloroquine and probiotic	30 mins to 1 hour	Run	Challenging	2019-05-03	3	Soft and formed (like peanut butter)	2130
2016-07-29 21:53:00	2016-07-29 21:59:00	325	1014	29072016	2016-07-29	442	Pop Tarts And A Banana		All of it	Nutragrain Bar Granola Bar And Chicken Jerky And Almonds		All of it	Peperroni Pizza Macaroni And Cheese Mortadela And Cheese Sandwhich		All of it		Bottled water			Soda	Sports energy drink (e.g. Gatorade)						Good									Probiotic	1 to 2 hours	Running	Very Challenging	2019-05-03	2	Hard and formed (like a cigar)	2130
2016-07-30 23:05:00	2016-07-30 23:05:00	90299	1014	30072016	2016-07-30	530	Coco Crispies Lacto Free Milk		All of it	Salmon Mac And Cheese Cucumbers		All of it		31898a1b-f775-4112-a733-6645b58b1afb.jpg	All of it	Fig newtons	Bottled water				Sports energy drink (e.g. Gatorade)						Good							Muscle strain		Probiotic	30 mins to 1 hour	Running	Challenging	2019-05-03	3	Soft and formed (like peanut butter)	2200
2016-08-01 21:39:00	2016-08-01 21:39:00	167654	1014	31072016	2016-07-31	530	Coco Crispies Peanut Butter And Jam Sandwhich		All of it	Subway Sandwhich Ham Cheese Olives Tomatos Pickles Sun Whole Grain Chips		All of it	Peanut Butter Jam And A Cheese And Lunch Meat Sadwhiches		All of it	Whole grain chips	Bottled water				Sports energy drink (e.g. Gatorade)		Milk				Good							Muscle strain		Probiotic	30 mins to 1 hour	Walk	Easy	2019-05-03	2	Soft and formed (like peanut butter)	2230
2016-08-01 22:57:00	2016-08-01 22:57:00	4648	1014	1082016	2016-08-01	530	Poptarts		All of it	Steak Macaroni And Cheese Tomatoes Cucumbers Cranberry Sauce Yougurt Carrots		All of it	BLT Sandwhich Tomato Cucumber Olives Ice Cream Corn		All of it	None	Bottled water				Sports energy drink (e.g. Gatorade)						Good				Tiredness			Muscle strain		Chloroquine and probiotic	30 mins to 1 hour		Challenging	2019-05-03	3	Soft and formed (like peanut butter)	2130
2016-08-03 12:52:00	2016-08-10 09:27:00	136488	1014	2082016	2016-08-02	530	Coco Krispies With Lacto Free Mill Roll With Slice Of Ham		All of it	Chicken Rice Cucumbers Mixed Vegetables Ice Cream Potato Salad		All of it		22846b92-8207-429e-883d-9e88794197a6.jpg	All of it		Bottled water				Sports energy drink (e.g. Gatorade)						Good										Less than 30 mins	Run	Moderate	2019-05-03	3	Soft and formed (like peanut butter)	2100
2016-08-04 11:14:00	2016-08-10 09:27:00	80532	1014	3082016	2016-08-03	500	Capn Crunch And Lacto Free Milk		All of it	Ribs Corn Rice Cucubers Radishes Olives Potato Salad Mixed Canned Fruit		All of it	Salmon Pasta Salad With Vegetables Green Beans Mixed Canned Fruit Blueberry Cobbler		All of it		Bottled water				Sports energy drink (e.g. Gatorade)						Good		Gastrointestinal issues		Tiredness					Imodium	30 mins to 1 hour	Run pushups situps	Very Challenging	2019-05-03	2	Soft and formed (like peanut butter)	2100
2016-08-08 15:12:00	2016-08-10 09:27:00	359868	1014	4082016	2016-08-04	520	Capn Crunch Cereal With Lacto Free Milk Yr		All of it	Beef Fried Plantain Pupusa Cheese Beans Scrambled Eggs		All of it	Rice Plantains Beef Lettuce Mango Tomato		All of it		Bottled water			Soda	Sports energy drink (e.g. Gatorade)						Good							Muscle strain			30 mins to 1 hour	Run	Challenging	2019-05-03	3	Soft and formed (like peanut butter)	2200
2016-08-08 15:19:00	2016-08-10 09:27:00	244	1014	6082016	2016-08-06	530	Capn Crunch And Lactose Free Milk		All of it	Peanut Butter And Jam Bread Chips		All of it	Rice Beans Chicken		All of it		Bottled water			Soda	Sports energy drink (e.g. Gatorade)						Good							Muscle strain		None	1 to 2 hours	Running	Challenging	2019-05-03	2	Soft and formed (like peanut butter)	2200
2016-08-08 15:15:00	2016-08-10 09:27:00	207	1014	7082016	2016-08-07	700	Nothing			Nothing			Peanut Butter And Jam Bologna Cheese Bread Chips Fig Newtons Golf Fish Crackers		All of it	None	Bottled water				Sports energy drink (e.g. Gatorade)						Ill		Gastrointestinal issues								Less than 30 mins		Easy	2019-05-03	2	Liquid (like water)	2100
2016-08-10 09:27:00	2016-08-10 09:27:00	151669	1014	8082016	2016-08-08	520	Capn Crunch And Lacto Free Milk		All of it	Ribs Potatoes Corn Mixed Veggies Radishes Olives Beets Ice Cream Walnuts		All of it		c1128dbf-a7b3-4878-970d-07907719fe44.jpg			Bottled water				Sports energy drink (e.g. Gatorade)						Good				Tiredness						30 mins to 1 hour	Run	Challenging	2019-09-06	2	Soft and formed (like peanut butter)	2100
2016-08-13 11:45:00	2016-08-13 11:45:00	267471	1014	10082016	2016-08-10	300	Poptarts		All of it																												30 mins to 1 hour		Very Challenging		2	Soft and formed (like peanut butter)	2100
2016-08-13 22:21:00	2016-08-13 22:21:00	38172	1014	13082016	2016-08-13	530	Capn Crunch Yogurt Fig Newtons		All of it	Pupusas Mixtas Jalapenos		All of it	Ham Sandwhich Tomato Chips		All of it	Crackers	Bottled water			Soda	Sports energy drink (e.g. Gatorade)						Good							Muscle strain			1 to 2 hours	Run	Very Challenging	2019-05-03	2	Soft and formed (like peanut butter)	2100
2016-08-15 00:08:00	2016-08-15 00:08:00	92811	1014	14082016	2016-08-14	400	Sweet Bread		All of it	Hot Dogs Chips Tomatoes Bread		All of it	Peanut Butter And Jam Sandwhich. Salami Sandwhich Chips		All of it	Fig newtpns and Crackers	Bottled water				Sports energy drink (e.g. Gatorade)		Milk				Good							Muscle strain		Probiotic	Less than 30 mins	Walk	Easy	2019-09-06	2	Soft and formed (like peanut butter)	2100
2016-08-15 20:40:00	2016-08-15 20:41:00	73944	1014	15082016	2016-08-15	520	Poptarts		All of it	Beef Fajitas Beets Carrots Olives Macaroni Salad Watermelon Yogurt		All of it		9b2da9ba-4e44-4f1e-a83c-46ea0383dfec.jpg	All of it	None	Bottled water				Sports energy drink (e.g. Gatorade)						Good		Gastrointestinal issues							Chloroquine	30 mins to 1 hour	Run	Challenging	2019-05-03	3	Loose and unformed (like a thick milkshake)	2100
2016-08-19 22:27:00	2016-08-19 22:27:00	352020	1014	16082016	2016-08-16	530	Capn Crunch Milk		All of it	Lasagna Rice Corn Beets Olives Tomatoes		3/4 of it	Hot Dog Salami Sandwhich Peanut Butter Sandwhich		All of it	Fig newtons	Bottled water				Sports energy drink (e.g. Gatorade)						Good		Gastrointestinal issues							Pepto bismol imodium	30 mins to 1 hour	Run	Challenging	2019-05-03	2	Liquid (like water)	2100
2016-08-19 22:31:00	2016-08-19 22:31:00	213	1014	18082016	2016-08-18	530	Peanut Butter Sandwhich		All of it	Peanut Butter Sandwhiches		All of it	Chicken Rice Corn Cucumbers Pickles Peaches Peas		All of it	Chips	Bottled water				Sports energy drink (e.g. Gatorade)						Good							Muscle strain		None	30 mins to 1 hour	Run	Challenging	2019-05-03	2	Hard and formed (like a cigar)	2100
2016-08-20 21:22:00	2016-08-20 21:22:00	82234	1014	20082016	2016-08-20	540	Capn Crunch Cereal With Milk		All of it	Subway Cold Cut Tomato Pickle Peppers Olives Chips		All of it	Hamburger French Fries Tomato And Lettuce		All of it		Bottled water			Soda	Sports energy drink (e.g. Gatorade)						Good							Muscle strain		None	1 to 2 hours	Run	Very Challenging	2019-05-03	3	Soft and formed (like peanut butter)	2200
2016-08-21 22:08:00	2016-08-21 22:08:00	89183	1014	21082016	2016-08-21	530	Pop Tarts		All of it	Peanut Butter Sandwhich Macaroni And Cheese		All of it	Hot Dogs Peanut Butter Sandwhich		All of it	Crackers and fruit snacks	Bottled water										Good									None	Less than 30 mins	Walk	Easy	2019-05-03	3	Soft and formed (like peanut butter)	2100
2016-08-22 21:19:00	2016-08-22 21:19:00	83480	1014	22082016	2016-08-22	510	Pop Tarts		All of it	Ribs Peas Carrots Jello Yogurt Cucumbers Olives Garbanzos		All of it	Crab Sandwhich	0f05e098-2bb2-457f-9f84-9e1715860600.jpg	All of it		Bottled water				Sports energy drink (e.g. Gatorade)		Milk				Good		Gastrointestinal issues							Chloroquine probiotic	30 mins to 1 hour	Run	Very Challenging	2019-05-03	3	Loose and unformed (like a thick milkshake)	2100
2016-08-24 22:20:00	2016-08-24 22:20:00	176411	1014	24082016	2016-08-24	530	Poptarts		All of it	Pork Chop Rice Beans Squash Beets Cucumbers Macaroni Salad Fruit Salad		All of it	Peanut Butter And Jam Sandwhiches Chips		All of it		Bottled water				Sports energy drink (e.g. Gatorade)		Milk				Good									Probiotic	30 mins to 1 hour	Run	Very Challenging	2019-05-03	3	Soft and formed (like peanut butter)	2100
2016-08-27 23:22:00	2016-08-27 23:22:00	262932	1014	26082016	2016-08-26	400	Poptarts		All of it		9256ca59-9b07-4e9b-807b-fdf1977ee818.jpg	All of it	Peanut Butter Sandwhich		All of it	Crackers	Bottled water				Sports energy drink (e.g. Gatorade)						Good							Muscle strain			Less than 30 mins	Walk	Easy	2019-05-03	3	Soft and formed (like peanut butter)	2030
2016-08-27 23:27:00	2016-08-27 23:27:00	314	1014	27082016	2016-08-27	530	Omelete Plaintains French Toast Yogurt Pecans		All of it	Yogurt Crackers		All of it	Meatloaf Cucumbers Pickles Fruit Salad Rice Beans		All of it	Fig newtons fruit snacks	Bottled water				Sports energy drink (e.g. Gatorade)						Good							Muscle strain		None	1 to 2 hours	Run	Very Challenging	2019-05-03	2	Soft and formed (like peanut butter)	2200
2016-08-29 14:15:00	2016-09-07 23:53:00	139681	1014	28082016	2016-08-28	600	Pop Tarts And Honey Bunchs Of Oats Cereal		All of it	Hot Dogs And Tomatos		All of it	Ramen Noodle With Veggies Peanut Butter And Jam Sanwhich		All of it	Fig newton cookies and crackers	Bottled water										Good							Muscle strain			Less than 30 mins	Walk	Easy	2019-09-06	2	Soft and formed (like peanut butter)	2120
2016-08-29 23:21:00	2016-08-29 23:22:00	32763	1014	29082016	2016-08-29	520	Cereal And Milk		All of it		0ec38059-f857-4cac-901e-7628f81e71dd.jpg	All of it	Chicken Vegetables Macaroni Salad Beets Olives Ice Cream Walnuts Yogurt		All of it		Bottled water				Sports energy drink (e.g. Gatorade)						Good									Chloroquine	30 mins to 1 hour	Running	Very Challenging	2019-05-03	2	Soft and formed (like peanut butter)	2100
2016-09-06 10:15:00	2016-09-07 23:53:00	167584	1014	4092016	2016-09-04	540	Cheese Fruit Yogurt Granola Eggs		All of it	Ham And Cheese Sandwhich		All of it	Peanutbutter Sandwhich Fig Newtons		All of it		Bottled water				Sports energy drink (e.g. Gatorade)			Fruit juice			Good									None	Less than 30 mins	Walk	Easy	2019-05-03	3	Soft and formed (like peanut butter)	2100
2016-09-06 10:18:00	2016-09-07 23:53:00	173	1014	5092016	2016-09-05	530	Poptarts Peanut Butter		All of it	Ham And Cheese Sandwhich With Tomatoes And Olives		All of it	Noodles With Beef Vegetables Tomatoes Olives Yogurt		All of it	Fig newtons	Bottled water				Sports energy drink (e.g. Gatorade)						Good							Muscle strain			1 to 2 hours	Run and calesthenics	Very Challenging	2019-05-03	3	Soft and formed (like peanut butter)	2200
2016-09-07 23:53:00	2016-09-07 23:53:00	135305	1014	6092016	2016-09-06	500	Poptarts Fig Newtons		All of it	Burrito		All of it	Tuna Sandwhich With Tomatoes And Olives Chips		All of it		Bottled water				Sports energy drink (e.g. Gatorade)						Good							Muscle strain			30 mins to 1 hour		Challenging	2019-05-03	3	Soft and formed (like peanut butter)	2200
2016-09-07 23:56:00	2016-09-07 23:56:00	190	1014	7092016	2016-09-07	530	Fig Newtons		All of it	Burrito		All of it	Chicken Enchiladas Cucumbers Squash Carrots And Yogurt		All of it		Bottled water										Good				Tiredness			Muscle strain		Chloroquine	Less than 30 mins	Run and walk	Moderate	2019-05-03	2	Soft and formed (like peanut butter)	2200
2016-09-10 21:58:00	2016-09-10 21:58:00	176	1014	9092016	2016-09-09	520	Pop Tarts		All of it	Soup Pork Salad		All of it	Chicken Skewers Vegetables Rice		All of it		Bottled water			Soda	Sports energy drink (e.g. Gatorade)						Good							Muscle strain			30 mins to 1 hour	Run	Moderate	2019-05-03	3	Soft and formed (like peanut butter)	2200
2016-09-10 21:55:00	2016-09-10 21:55:00	251945	1014	10092016	2016-09-10	530	Omlete With Cheese Tomato And Mushrooms Pineapple Watermelon Hash Browns		All of it	Nothing				74e8af1f-e96f-4210-92e4-fe613325a7b4.jpg	All of it	Cookies	Bottled water				Sports energy drink (e.g. Gatorade)						Good										1 to 2 hours	Run	Very Challenging	2019-05-03	2	Hard and formed (like a cigar)	2200
2016-09-11 22:32:00	2016-09-11 22:32:00	88450	1014	11092016	2016-09-11	600	Poptarts And Banana		All of it	Tomato Cucumber Salami Sandwhich Cookies		All of it	Hot Dogs Tomato And Cookies		All of it		Bottled water										Good										30 mins to 1 hour	Walk	Moderate	2019-05-03	2	Soft and formed (like peanut butter)	2200
2016-09-16 17:22:00	2016-09-28 03:06:00	379	1014	13092016	2016-09-13	500	Egg And Veggie Subway Breakfast Sandwich. Poptarts		All of it	Nothing			Beef Rice Beans Plantains		All of it	Rootbeer float almonds	Bottled water			Soda	Sports energy drink (e.g. Gatorade)						Good									Imodium	30 mins to 1 hour	Run	Challenging	2019-05-03	3	Soft and formed (like peanut butter)	2100
2016-09-16 17:16:00	2016-09-28 03:06:00	219	1014	14092016	2016-09-14	730	Eggs Rice Beans Plantains		All of it	Nothing			Chicken Rice And Beans		All of it	Almonds	Bottled water			Soda	Sports energy drink (e.g. Gatorade)						Good									None	1 to 2 hours	Run and walk	Challenging	2019-05-03	2	Soft and formed (like peanut butter)	2100
2016-09-16 17:12:00	2016-09-28 03:06:00	225	1014	15092016	2016-09-15	505	Poptart		All of it	Pancake Eggs Sausage Plantains		All of it	Chicken Pinapple Rice And Beans Peppers Tomato		All of it	Almonds	Bottled water			Soda	Sports energy drink (e.g. Gatorade)			Fruit juice			Good									None	30 mins to 1 hour	Run	Challenging	2019-05-03	2	Soft and formed (like peanut butter)	2100
2016-09-26 14:27:00	2016-09-28 03:06:00	853478	1014	16092016	2016-09-16	700	Poptart		All of it	Potatoes Toast Eggs		All of it					Bottled water				Sports energy drink (e.g. Gatorade)						Ill		Gastrointestinal issues							Imodium peptp bismal	30 mins to 1 hour	Run	Challenging	2019-05-03	5	Loose and unformed (like a thick milkshake)	2100
2016-09-26 14:31:00	2016-09-28 03:06:00	245	1014	25092016	2016-09-25	600	Nothing			Nothing			Peanut Btter Sandwhichs Macaroni And Cheese		All of it	Popcorn	Bottled water				Sports energy drink (e.g. Gatorade)						Good										30 mins to 1 hour	Walk and physical labor	Moderate	2019-05-03	2	Soft and formed (like peanut butter)	2200
2016-09-28 03:06:00	2016-09-28 03:06:00	155	1014	27092016	2016-09-27	600	Cereal And A Apple		All of it	Hot Dogs		All of it	Steak Shrimp Tomatoes Carrots		All of it		Bottled water				Sports energy drink (e.g. Gatorade)						Good										30 mins to 1 hour	Walk	Easy	2019-05-03	2	Soft and formed (like peanut butter)	2120
2016-09-29 10:00:00	2016-09-29 10:00:00	111227	1014	28092016	2016-09-28	455	Yogurt			Fajitas Salad Rice And Beans		All of it		58079754-c778-439e-9372-4108396c5186.jpg		None	Bottled water				Sports energy drink (e.g. Gatorade)						Good		Gastrointestinal issues					Muscle strain		Imodium	30 mins to 1 hour	Run puships situps	Very Challenging	2019-05-03	2	Soft and formed (like peanut butter)	2100
2016-09-29 23:32:00	2016-09-29 23:32:00	48695	1014	29092016	2016-09-29	520	Cereal With Milk		All of it	Fajitas Cucumbers Corn Fruit Cocktail				1728d864-f733-4711-bd63-b5a30110c571.jpg	All of it	Popcorn and ice cream	Bottled water				Sports energy drink (e.g. Gatorade)						Good							Muscle strain		Ibuprofen probiotic	30 mins to 1 hour		Very Challenging	2019-05-03	2	Hard and formed (like a cigar)	2130
2016-10-02 10:06:00	2016-10-02 10:06:00	210850	1014	1102016	2016-10-01	530	Poptart Yogurt		All of it	Stew With A Buscuit Radises Cucumbers Corn Watermelon Ice Cream		All of it	Salami And Tomato Sandwhiches Goldfish Crackers		All of it		Bottled water				Sports energy drink (e.g. Gatorade)						Good										30 mins to 1 hour	Run	Challenging	2019-05-03	3	Soft and formed (like peanut butter)	2100
2016-10-02 21:36:00	2016-10-02 21:36:00	41411	1014	2102016	2016-10-02	500	Poptarts		All of it	Peanut Butter Sandwichs Chips		All of it	Hotdogs Tomatoe Goldfish Crackers		All of it		Bottled water				Sports energy drink (e.g. Gatorade)						Ill		Gastrointestinal issues							Imodium probiotic	Less than 30 mins		Easy	2019-09-06	4	Soft and formed (like peanut butter)	2100
2016-11-13 20:25:00	2016-11-13 20:25:00	181	1014	8102016	2016-10-08	500	Mre		3/4 of it	Mre		3/4 of it	MRE		3/4 of it		Bottled water										Good									Chloroquine	Less than 30 mins	Walk	Easy	2019-05-03	1	Hard and formed (like a cigar)	2200
2016-11-13 20:26:00	2016-11-13 20:26:00	102	1014	9102016	2016-10-09	500	MRE		3/4 of it	MRE		3/4 of it	MRE		3/4 of it		Bottled water										Good										Less than 30 mins	Walk	Easy	2019-05-03	1	Hard and formed (like a cigar)	2200
2016-11-13 20:28:00	2016-11-13 20:28:00	95	1014	10102016	2016-10-10	500	MRE		3/4 of it	MRE		3/4 of it	MRE		3/4 of it		Bottled water										Good				Tiredness						Less than 30 mins	Walk	Easy	2019-05-03	1	Hard and formed (like a cigar)	2200
2016-11-13 20:30:00	2016-11-13 20:30:00	104	1014	11102016	2016-10-11	530	MRE		3/4 of it	MRE		3/4 of it	MRE		3/4 of it		Bottled water										Good				Tiredness						Less than 30 mins	Walk	Easy	2019-05-03	1	Hard and formed (like a cigar)	2200
2016-11-13 20:31:00	2016-11-13 20:31:00	107	1014	12102016	2016-10-12	530	MRE		3/4 of it	MRE		3/4 of it	MRE		3/4 of it		Bottled water										Good				Tiredness						Less than 30 mins	Walk	Easy	2019-05-03	1	Hard and formed (like a cigar)	2230
2016-11-13 20:34:00	2016-11-13 20:34:00	135	1014	14102016	2016-10-14	500	Eggs Cheese And Melon		All of it	MRE		3/4 of it	MRE		3/4 of it		Bottled water														Tiredness						Less than 30 mins	Walk	Easy	2019-05-03	2	Soft and formed (like peanut butter)	2200
2016-11-13 20:38:00	2016-11-13 20:38:00	234	1014	4112016	2016-11-04	400	MRE		1/2 of it	Hamburger And Fries Lettuce And Tomato		All of it	Ceviche Ice Cream Bananas		All of it		Bottled water			Soda				Fruit juice			Good					Runny or blocked nose					Less than 30 mins	Swimming	Moderate	2019-05-03	2	Soft and formed (like peanut butter)	2200
2016-11-07 22:50:00	2016-11-07 22:50:00	198	1014	5112016	2016-11-05	500	Ham And Cheese Sandwhich		All of it	Pizza		All of it	Hamburger Hot Dog Potatoes Pie		All of it		Bottled water			Soda	Sports energy drink (e.g. Gatorade)						Good										30 mins to 1 hour	Run	Challenging	2019-05-03	1	Soft and formed (like peanut butter)	2330
2016-11-07 22:46:00	2016-11-07 22:46:00	281	1014	6112016	2016-11-06	550	Nothing			Nothing			Veggies Peaches Mac Amd Cheese Salmon		All of it	Almonds	Bottled water				Sports energy drink (e.g. Gatorade)						Very Ill	Fever	Gastrointestinal issues	Headache	Tiredness					Azithromycin imodium pepto bismol ibuprofen	Less than 30 mins	Walk	Easy	2019-05-03	6+	Liquid (like water)	2000
2016-11-07 22:42:00	2016-11-07 22:42:00	234	1014	7112016	2016-11-07	515	Almonds And Crackers And Yogurt		All of it	Ribs Vegetables Potatoes		All of it	Crab Sandwhich Veggies Maxaroni Salad Peaches		All of it		Bottled water				Sports energy drink (e.g. Gatorade)						Ill	Fever	Gastrointestinal issues	Headache	Tiredness					Azirhromycin chloroquine pepto	Less than 30 mins		Moderate	2019-05-03	0		2030
2016-11-11 21:10:00	2016-11-11 21:10:00	519	1014	9112016	2016-11-09	530	Yogurt Peaches Sausage Dates Cheese Stick		All of it	Plantains Pork Beans Beef		3/4 of it	Almonds And Chips		All of it		Bottled water			Soda	Sports energy drink (e.g. Gatorade)						Good				Tiredness	Runny or blocked nose					Less than 30 mins	Run	Challenging	2019-05-03	3	Loose and unformed (like a thick milkshake)	2200
2016-11-11 20:57:00	2016-11-11 20:57:00	338859	1014	11112016	2016-11-11	530	Almonds		All of it	Cucumbers Fish Mac And Cheese Peaches		All of it	Ham And Cheese Sandwhich Peaches Olives Macaroni Salad		All of it		Bottled water				Sports energy drink (e.g. Gatorade)						Good				Tiredness						30 mins to 1 hour	Run	Challenging	2019-05-03	2	Loose and unformed (like a thick milkshake)	2030
2016-11-13 20:18:00	2016-11-13 20:18:00	169737	1014	12112016	2016-11-12	600	Cereal And Milk		All of it	Veggies Peaches Crab Sandwhich Olives Cucumbers Ice Cream Walnuts		All of it	Peanut Butter And Jelly		All of it	Almonds and chips	Bottled water				Sports energy drink (e.g. Gatorade)		Milk				Good										30 mins to 1 hour		Challenging	2019-05-03	3	Soft and formed (like peanut butter)	2200
2016-11-13 20:22:00	2016-11-13 20:22:00	188	1014	13112016	2016-11-13	700	Cereal And Milk		All of it	Peanut Butter And jelly Sadwhich And A Hot Dog		All of it	Apple Pie Yogurt Corn Enchiladas Rice And Beans Cucumbers Olives		All of it	Almonds	Bottled water										Good										Less than 30 mins	Walk	Easy	2019-05-03	4	Soft and formed (like peanut butter)	2130
2016-11-15 13:17:00	2016-11-17 21:06:00	146386	1014	14112016	2016-11-14	530	Poptart Almonds		All of it	Barbeque Beef Corn Potatoes Cucumbers Olives Yougurt		All of it	Chicken Tetrazini Corn Tomato Olives Cukes		All of it	Almonds	Bottled water				Sports energy drink (e.g. Gatorade)						Good									Chloroquine	30 mins to 1 hour	Run	Very Challenging	2019-05-03	3	Soft and formed (like peanut butter)	2130
2016-11-17 21:06:00	2016-11-17 21:06:00	200931	1014	16112016	2016-11-16	530	Poptart		All of it		d99eb54b-6512-4bca-8971-295dc75b1617.jpg	All of it	Jerky Nuts Dried Fruit		All of it	Almonds	Bottled water										Good		Gastrointestinal issues							Imodium	30 mins to 1 hour	Run	Challenging	2019-05-03	4	Soft and formed (like peanut butter)	2130
2016-11-17 21:10:00	2016-11-17 21:10:00	222	1014	17112016	2016-11-17	530	Poptart		All of it	Fajitas Cucubers Corn Olives Peaches		All of it	Fish Mac And Cheese Carrots Cucumbers Watermelon Yogurt		All of it	Almonds	Bottled water										Good										30 mins to 1 hour	Run	Challenging	2019-05-03	3	Hard and formed (like a cigar)	2100
2016-11-19 11:25:00	2016-11-19 20:07:00	137673	1014	18112016	2016-11-18	530	Poptarts			Sandwhich Barbeque Beef French Fries		All of it	Jerky Cashews Almonds Dried Fruit		All of it	Nuts and dried fruit	Bottled water				Sports energy drink (e.g. Gatorade)			Fruit juice			Good				Tiredness						Less than 30 mins	Run	Challenging	2019-05-03	3	Soft and formed (like peanut butter)	2000
2016-11-19 20:07:00	2016-11-19 20:07:00	31339	1014	19112016	2016-11-19	500	Jerky Dried Fruit Nuts		All of it	Meat Loaf Cucumbers Potatoes Olives Beets Radish Corn Watermelon And Ice Cream With Walnuts		All of it	Veal Parmigiana Corn Lima Beans Cucumbers Radishes Olives Soup Yogurt		All of it		Bottled water				Sports energy drink (e.g. Gatorade)						Good										1 to 2 hours	Run and calesthenics	Very Challenging	2019-05-03	3	Loose and unformed (like a thick milkshake)	2100
2016-11-21 21:47:00	2016-11-21 21:47:00	178791	1014	20112016	2016-11-20	600	Cereal Jerky. Yogurt		All of it	Peanut Butter Jerky And Dried Fruit And Nuts		All of it	Peanut Butter And Jelly Sandwhich Jerky Nuts And Dried Fruit		All of it	Jerky	Bottled water				Sports energy drink (e.g. Gatorade)		Milk				Good										30 mins to 1 hour	Walk	Easy	2019-05-03	3	Soft and formed (like peanut butter)	2100
2016-11-21 21:51:00	2016-11-21 21:51:00	274	1014	21112016	2016-11-21	530	Poptarts		All of it	Vegetable Lasanga Pickles Olives Radishes Green Beans Yogurt		All of it	Pork Chop Potatoes Green Beans Olives Pickles Radishes Fruit Cocktail Jello		All of it	Jerky dried fruit	Bottled water				Sports energy drink (e.g. Gatorade)						Good									Chloroquine	30 mins to 1 hour	Run	Challenging	2019-05-03	3	Soft and formed (like peanut butter)	2130
2016-11-24 22:58:00	2016-11-24 22:58:00	263209	1014	22112016	2016-11-22	400	Omellete Plantains Pancake Syrip Yogurt		All of it								Bottled water				Sports energy drink (e.g. Gatorade)						Good										30 mins to 1 hour	Run	Challenging	2019-05-03	3	Soft and formed (like peanut butter)	2100
2016-11-24 23:02:00	2016-11-24 23:02:00	257	1014	24112016	2016-11-24	400	Poptart Jerky		All of it	Barbque Beef Potatoes Corn Radish Beets Olives Pickles Fruit Salad		All of it	Cereal Dried Fruit		All of it	Nuts	Bottled water				Sports energy drink (e.g. Gatorade)		Milk				Good										1 to 2 hours	Run	Challenging	2019-05-03	3	Soft and formed (like peanut butter)	2200
2016-11-26 11:14:00	2016-11-26 11:14:00	130081	1014	25112016	2016-11-25	500	Poptarts Jerky		All of it	Salmon Mac & Cheese Mixed Veggies Olives Cucumbers Yogurt		All of it	Subway 6 Inch Cold Cut Sandwhich And Chips		All of it		Bottled water				Sports energy drink (e.g. Gatorade)		Milk				Good										30 mins to 1 hour	Run	Challenging	2019-05-03	4	Soft and formed (like peanut butter)	2215
2016-11-26 20:24:00	2016-11-26 20:25:00	33014	1014	26112016	2016-11-26	530	Choclate Milk		All of it	Sphagetti With Meat Sauce Cucumber Pickles Olives Watermelon Yogurt		All of it	Beef And Bean Burrito Corn Potatoes Cucubers Tomato Pickles Olives Grapefruit Yogurt		All of it		Bottled water				Sports energy drink (e.g. Gatorade)		Milk				Good										1 to 2 hours	Run	Very Challenging	2019-05-03	3	Soft and formed (like peanut butter)	2200
2016-11-27 20:23:00	2016-11-27 20:23:00	86291	1014	27112016	2016-11-27	130	Omellete With Ham Cheese Mushrooms Salsa Hashbrowns Yogurt		All of it	Bowl Of Cereal		All of it	Peaches Cucumbers Egg Salad Sandwhich Potato Salad Yogurt		All of it	Nuts	Bottled water				Sports energy drink (e.g. Gatorade)						Good				Tiredness						Less than 30 mins	Walk	Easy	2019-09-06	3	Soft and formed (like peanut butter)	2000
2016-11-28 23:08:00	2016-11-28 23:08:00	96329	1014	28112016	2016-11-28	600	Cereal Jerky Dried Fruit		All of it	Baleadas With Beans And Cheese Flour Tortillas		All of it	Shrimp Tomatoes Lima Beans Macaroni And Tomato Soup Potatoes And Gravy Cucumbers Pickles Ice Cream Walnuts		All of it	Reeses peanut butter	Bottled water										Ill			Headache	Tiredness	Runny or blocked nose				Chloroqine	30 mins to 1 hour	Run	Challenging	2019-05-03	3	Soft and formed (like peanut butter)	2130
2016-11-29 20:52:00	2016-11-29 20:52:00	78254	1014	29112016	2016-11-29	530	Eggs Grapfruit Hashbrows Cantelope Pankake With Syrup		All of it	Salmon With Vegetables Stir Fry Asparagus Cucumbers Olives Ice Cream		All of it	Eggs Beans Salsa Tortillas And Chips		All of it		Bottled water				Sports energy drink (e.g. Gatorade)						Good				Tiredness						30 mins to 1 hour	Pushups situps PRT and run	Very Challenging	2019-09-06	3	Soft and formed (like peanut butter)	2100
2016-12-01 22:01:00	2016-12-01 22:01:00	176944	1014	30112016	2016-11-30	530	Scrambled Eggs Pancake Syrup Yogurt Hash Browns Melon		All of it	Chicken Beans Rice		All of it	Jerky Nuts Dried Fruit		All of it		Bottled water			Soda	Sports energy drink (e.g. Gatorade)						Good		Gastrointestinal issues							Imodium	30 mins to 1 hour	Run	Very Challenging	2019-09-06	2	Soft and formed (like peanut butter)	2100
2016-12-01 22:05:00	2016-12-01 22:05:00	225	1014	1122016	2016-12-01	530	Cereal And Milk Sweet Bread		All of it	Meat Rice Cheese Avacado Tortillas		All of it	Hot Dogs Bread Dried Fruit And Nuts		All of it		Bottled water			Soda							Good									None	Less than 30 mins	Run	Challenging	2019-05-03	1	Soft and formed (like peanut butter)	2100
2016-12-04 02:49:00	2016-12-04 02:49:00	189837	1014	2122016	2016-12-02	530	Cereal		All of it	Cucumbers Olives Meat Loaf Poratoes Fruit Salad		All of it	Crab Sandwhich Macaroni Salad Beets Radishes Yogurt Soup		All of it		Bottled water				Sports energy drink (e.g. Gatorade)						Ill		Gastrointestinal issues							Imodium peptobismal	30 mins to 1 hour		Very Challenging	2019-05-03	4	Liquid (like water)	2100
2016-12-04 02:53:00	2016-12-04 02:53:00	204	1014	3122016	2016-12-03	530	Yogurt		All of it	Burrito Taco		All of it	Carne Asada Plantains Rice Salsa Salad		All of it	Gummy bears	Bottled water			Soda							Good							Muscle strain			1 to 2 hours	Run	Very Challenging	2019-05-03	3	Soft and formed (like peanut butter)	2230
2016-12-05 21:18:00	2016-12-05 21:18:00	152716	1014	4122016	2016-12-04	600	Cereal And Poptart		All of it	Nothing			Hot Dog Salad And Chips		All of it	Almonds and dried fruit	Bottled water										Good										Less than 30 mins	Walk	Easy	2019-05-03	4	Soft and formed (like peanut butter)	2100
2016-12-05 21:23:00	2016-12-05 21:23:00	308	1014	5122016	2016-12-05	530	Poptart And Almonds		All of it	Olives Cucumbers Ribs Macaroni Salad Yogurt		All of it	Egg Salad Sandwhich Mac Salad Watermelon Radishes Cucumbers Tamato		All of it	Cookies	Bottled water										Good									Chloroquine	1 to 2 hours	Run calesthenics	Very Challenging	2019-05-03	4	Soft and formed (like peanut butter)	2130
2016-12-06 21:21:00	2016-12-06 21:21:00	214	1014	6122016	2016-12-06	530	Poptarts And Almonds Yogurt		All of it	Steak Shrimp Tomatoes Corn Peaches Olives Beets		All of it	Enchiladas Corn Olives Potato Salad Peaches Yogurt		All of it	Almonds and cookies	Bottled water										Good				Tiredness						30 mins to 1 hour	Calesthenics and run	Very Challenging	2019-05-03	2	Soft and formed (like peanut butter)	2100
2016-12-08 21:15:00	2016-12-08 21:15:00	223	1014	7122016	2016-12-07	530	Cereal Cookies		All of it	Oluves Tomatoes Enchiladas Corn Yogurt Soup		All of it	Crab Sandwhich Pasta Salad Olives Tomatoes Ice Cream		All of it	Cookies almonds		Base purified water			Sports energy drink (e.g. Gatorade)						Good				Tiredness						30 mins to 1 hour	Run	Challenging	2019-05-03	3	Soft and formed (like peanut butter)	2130
2016-12-08 21:19:00	2016-12-08 21:19:00	202	1014	8122016	2016-12-08	520	Cookies Almonds Yogurt		All of it	Almonds Cookies		All of it	Spaguetti Corn Green Beans Olives Chick Peas Canned Fruit Yogurt		All of it	Cookies almonds	Bottled water										Good				Tiredness						30 mins to 1 hour	Run and calesthenics	Challenging	2019-05-03	3	Soft and formed (like peanut butter)	2100
2016-12-09 23:19:00	2016-12-11 06:28:00	93613	1014	9122016	2016-12-09	520	Almonds Poptarts		All of it	Chicken Mixed Vegetables Bread Pudding Fruit Salad		All of it	Beef Stew Cucumbers Olives Tomato Pasta Salad Fruit Salad		All of it		Bottled water			Soda							Good				Tiredness						30 mins to 1 hour	Run and calesthenics	Challenging	2019-05-03	3	Soft and formed (like peanut butter)	2030
2016-12-11 06:28:00	2016-12-11 06:28:00	323	1014	10122016	2016-12-10	530	Cereal Almonds		All of it	Olives Cucumbers Bratwurst Potatoes Grapfruit Beets		All of it	Hamburger Potatoes Gravy Corn Peas Yogurt		All of it	Cookies almonds	Bottled water				Sports energy drink (e.g. Gatorade)		Milk				Good				Tiredness			Muscle strain			1 to 2 hours	Run calesthenics	Very Challenging	2019-09-06	3	Soft and formed (like peanut butter)	2200
2016-12-11 23:04:00	2016-12-13 21:44:00	30836	1014	11122016	2016-12-11	530	Omellette Pancakes Potatoes Tomato Ham Cheese Mushrooms Yogurt Water Melon		All of it	Egg Sandwhich Potatoe Salad Watermelon Olives		All of it	Fish Mac And Cheese Corn And Beans Cucumbers Olives Apple Pie		All of it	Cookies	Bottled water							Fruit juice			Good		Gastrointestinal issues							Imodium	30 mins to 1 hour	Walk	Easy	2019-05-03	4	Loose and unformed (like a thick milkshake)	2200
2016-12-12 21:07:00	2016-12-13 21:44:00	233	1014	12122016	2016-12-12	530	Cereal Nuts And Dried Fruit		All of it	Beef Plantains Cheese Beans Tortillas		All of it	Sweet And Sour Chicken Cashews Carrots		3/4 of it		Bottled water			Soda							Good									Cloroquine	30 mins to 1 hour	Run and calesthenics	Challenging	2019-05-03	2	Soft and formed (like peanut butter)	2100
2016-12-13 21:44:00	2016-12-13 21:44:00	88597	1014	13122016	2016-12-13	515	Eggs Tamal Pineapple Watermelon Papaya Rice And Beans Cheese		All of it	Nothing			Cran Sandwhich Peas Olives Radishes Potato Salad Ice Cream Almonds Dried Fruit		All of it		Bottled water										Good										Less than 30 mins	Run	Very Challenging	2019-05-03	3	Hard and formed (like a cigar)	2100
2016-12-15 00:33:00	2016-12-15 00:33:00	254	1014	14122016	2016-12-14	445	Eggs Cantelope Potatoes Plantains Yogurt		All of it	Fish Plantains Rice And Beans		All of it	Nothing			Cinnamon candy rosquilla dried bananna	Bottled water			Soda							Good										30 mins to 1 hour	Run	Challenging	2019-05-03	2	Hard and formed (like a cigar)	2100
2016-12-17 14:19:00	2016-12-17 14:19:00	222393	1014	16122016	2016-12-16	530	Poptarts And Almonds		All of it	Ribs Olives Peaches Icecream Corn Cucumbers		All of it	Meat Plantains Rice Beans Cucumber Tomato		All of it		Bottled water			Soda							Good										30 mins to 1 hour	Run	Very Challenging	2019-05-03	3	Soft and formed (like peanut butter)	2100
2016-12-18 13:01:00	2016-12-18 13:01:00	81724	1014	17122016	2016-12-17	630	Almonds		All of it	Hotdogs Bread Chips		All of it	Ham And Cheese Sandwhich Peas Cucumbers Rasdishes Corn Chips Yogurt		All of it		Bottled water										Good		Gastrointestinal issues							Imodium. Bismuth subsalycilate	1 to 2 hours	Run and calesthenics	Very Challenging	2019-05-03		Loose and unformed (like a thick milkshake)	2100
2016-12-20 08:11:00	2016-12-20 08:11:00	155363	1014	18122016	2016-12-18	610	Poptarts Almonds		All of it	Peanut Butter And Jelly Sandwhichs Chips Dried Fruit		All of it	Burrito Olives Cucumbers Corn And Beans Ice Cream		All of it	Chips dried fruit	Bottled water										Good										30 mins to 1 hour	Walk	Easy	2019-05-03	0		2100
2016-12-20 08:16:00	2016-12-20 08:16:00	348	1014	19122016	2016-12-19	530	Almonds Pop Tarts		All of it	Pork Ribs Potatos Corn Cucumbers Olives		All of it	Peanut Butter And Jelly Almonds And Chips		All of it	Dried fruit chocalate candy	Bottled water										Good										30 mins to 1 hour	Run and calesthenics	Very Challenging	2019-05-03	2	Soft and formed (like peanut butter)	2200
2016-12-20 19:49:00	2016-12-20 19:49:00	41483	1014	20122016	2016-12-20	530	Pop Tarts And Almonds		All of it	Shrimp Rice Pork Cucumber Olives Tomatos		All of it	Ramen Noodle Hot Dog Mandarine Chips		All of it	Almonds chocalate dried fruit	Bottled water										Good									Chloroquine	30 mins to 1 hour	Run	Challenging	2019-05-03	3	Soft and formed (like peanut butter)	2100
2016-12-22 22:53:00	2016-12-22 22:53:00	219	1014	21122016	2016-12-21	530	Poptarts Almonds		All of it	Potatoes Ice Cream Meat Loaf Fruit Salad Cucumbers Beets Olives Ice Cream		All of it	Ham And Cheese Sandwhich Chips Yogurt Bean Andd Corn		All of it	Choclate dried fruit	Bottled water										Ill		Gastrointestinal issues							Imodium	30 mins to 1 hour	Run	Challenging	2019-05-03	4	Loose and unformed (like a thick milkshake)	2100
2016-12-22 22:57:00	2016-12-22 22:57:00	223	1014	22122016	2016-12-22	530	Poptarts Yogurt Almonds		All of it	Potatoes Chicken Cordon Bleu Yogurt Olives Tomatoes Cucumbers		All of it	Ham Turkey Pie Potatoes Olives Pickles Yams		All of it	Chocolate dried fruit	Bottled water							Fruit juice			Good										30 mins to 1 hour	Run calesthenics	Challenging	2019-05-03	2	Soft and formed (like peanut butter)	2130
2016-12-24 14:36:00	2016-12-24 14:36:00	142772	1014	23122016	2016-12-23	530	Poptarts And Almonds		All of it	Fried Chicken Salad Rice And Beans		All of it	Hot Dogs Chips Mandarine		All of it	Almonds dried fruit	Bottled water			Soda							Good							Muscle strain			1 to 2 hours	Run and calesthenics	Very Challenging	2019-09-06	3	Soft and formed (like peanut butter)	2100
2016-12-24 19:21:00	2016-12-24 19:21:00	17115	1014	24122016	2016-12-24	630	Poptarts And Almonds		All of it	Fish Mac And Cheese Green Beans Carrots Olives Cucumbers Beets Grapfruit		All of it	Ham And Cheese Sandwich Peas Beans Cucumbers Olives Tomato Chicken Noodle Soup Yogurt		All of it	Almonds dried fruit	Bottled water										Good							Muscle strain			1 to 2 hours	Run and calesthenics	Very Challenging	2019-09-06	3	Soft and formed (like peanut butter)	2200
2016-12-26 22:44:00	2016-12-26 22:44:00	18090	1014	26122016	2016-12-26	600	Almonds And Yogurt		All of it	Chicken Potatoes Corn Pickles Cantelope Grapes		All of it	Ham And Cheese Sandwhich Asparagus Corn Yogurt Corn Chips Crackers Soup		All of it		Bottled water				Sports energy drink (e.g. Gatorade)						Good									Chloroquine	1 to 2 hours	Run and calesthenics	Very Challenging	2019-09-06	4	Soft and formed (like peanut butter)	2130
2016-12-27 20:30:00	2016-12-31 01:03:00	211	1014	27122016	2016-12-27	530	Poptarts And Almonds		All of it	Baleadas With Bean Cheese And Tortillas		3/4 of it	Grilled Cheese Sandwhich Sweet Potatoe Fries		All of it		Bottled water		Tap water	Soda							Good									Imodium	30 mins to 1 hour	Run	Challenging	2019-09-06	2	Soft and formed (like peanut butter)	300
2016-12-30 23:11:00	2016-12-31 01:03:00	268874	1014	28122016	2016-12-28	700	Banana		All of it	Korean Barbeque Rice Kimchee Peaches		All of it	Pasta With Artichokes And Spinach Chicken		All of it	Olives candy tangerines			Tap water				Milk	Fruit juice			Good										30 mins to 1 hour	Run and calesthenics	Challenging	2019-09-06	0		2200
2016-12-30 23:15:00	2016-12-31 01:03:00	244	1014	29122016	2016-12-29	700	Hashbrowns Eggs Toast Tangerine		All of it	Nothing			Chicken Pasta Artichokes Cheese Spinach Toast		All of it	Chips with dip tangerines olives cookies			Tap water	Soda			Milk				Good										30 mins to 1 hour	Run and calesthenics	Challenging	2019-09-06	2	Soft and formed (like peanut butter)	2200
2016-12-30 23:19:00	2016-12-31 01:03:00	222	1014	30122016	2016-12-30	630	Waffles With Syrup Tangerines		All of it	Grilled Cheese		All of it	Crab Pasta		All of it	Chips dip tangerimes olives			Tap water				Milk				Good										1 to 2 hours	Run and calesthenics	Challenging	2019-09-06	3	Soft and formed (like peanut butter)	2200
2017-01-03 13:20:00	2017-01-03 13:20:00	314	1014	31122016	2016-12-31	700	Eggs Potatoes Banana		All of it	Chips And Dip		All of it	Sushi Shrimp Ginger Taquitos Guacamole		All of it	Licorice chips			Tap water				Milk	Fruit juice			Good										1 to 2 hours	Run and calesthenics	Very Challenging	2019-09-06	3	Soft and formed (like peanut butter)	2300
2017-01-03 13:11:00	2017-01-03 13:11:00	147463	1014	1012017	2017-01-01	630	Fritatta With Eggs Mushroom Onion Cheese Peppers French Toast Syrup		All of it	Crackers Olives		All of it	Ham Potatoes Green Beans		All of it	Crackers			Tap water					Fruit juice			Good										30 mins to 1 hour	Walk	Easy	2019-09-06	2	Soft and formed (like peanut butter)	2200
2017-01-03 13:15:00	2017-01-03 13:15:00	226	1014	2012017	2017-01-02	700	Eggs And Poratoes Tangerine		All of it	Crackers		All of it	Pasta With Mariscos Fish Shrimp And Calamari. Bread. Milkshake.		All of it	Crackers olives			Tap water					Fruit juice			Good										1 to 2 hours	Run and calesthenics	Very Challenging	2019-09-06	3	Soft and formed (like peanut butter)	2130
2017-01-03 21:00:00	2017-01-03 21:00:00	27591	1014	3012017	2017-01-03	510	Eggs Potatoes Tangerine		All of it	Crackers Tangerine		All of it	Chicken Grapes Celery Rolls Jam Brownies Ice Cream		All of it	Licorice chocolate			Tap water	Soda				Fruit juice	Yogurt		Good										30 mins to 1 hour	Run	Challenging	2019-09-06	3	Soft and formed (like peanut butter)	2300
2017-01-05 22:26:00	2017-01-05 22:26:00	240	1014	4012017	2017-01-04	640	Yogurt Tangerine		All of it	Salami Cheese Sprouts Tomato Sandwhich On Rye Bread Chips		All of it	Tortillas With Hamburger Cottage Cheese And Cheese Salad Woth Apples And Lettuce Brownies		All of it	Brownies crackers			Tap water								Good										30 mins to 1 hour	Run and calesthenics	Challenging	2019-09-06	3	Soft and formed (like peanut butter)	0
2017-01-05 22:30:00	2017-01-05 22:30:00	228	1014	5012017	2017-01-05	400	Empanada Of Cheese And Ham		All of it	Hamburger With Tomato And French Fries		All of it	Steak Fajitas Brown Rice Onions Cucumbers Potato Salad Green Beans And Peaches		All of it	Dried fruit and nuts	Bottled water			Soda							Good				Tiredness					Chloroquine	Less than 30 mins	Walk	Easy	2019-09-06	4	Soft and formed (like peanut butter)	2100
2017-01-06 23:20:00	2017-01-06 23:20:00	393	1014	6012017	2017-01-06	530	Yogurt Poptarts And Almonds			A Tamal With Chicken Dried Apples And Chocolate		All of it	Crab Sandwhich Macaroni Salad Cucumbers Peaches And Fruit Salad Pickles Olives Ice Cream With Walnuts And Strawberries		All of it	One candy	Bottled water				Sports energy drink (e.g. Gatorade)						Good										30 mins to 1 hour	Run and calesthenics	Challenging	2019-09-06	4	Soft and formed (like peanut butter)	2230
2017-01-08 04:53:00	2017-01-08 04:53:00	194	1014	7012017	2017-01-07	630	Poptarts And Almonds		All of it	Peanut Butter And Jelly Sandwhiches And Olives		All of it	Beef Onions Rice Tomatos Cucumbers Olives Peaches Yogurt		All of it	Choclate	Bottled water				Sports energy drink (e.g. Gatorade)						Good										1 to 2 hours	Run and calesthenics	Very Challenging	2019-05-03	3	Soft and formed (like peanut butter)	2300
2017-01-10 14:37:00	2017-01-10 14:37:00	207865	1014	8012017	2017-01-08	700	Nothing. Was Fasting			Nothing. Fasting				be5974ea-a185-4125-b679-d18a3cc40a9c.jpg	All of it	Yogurt olives almonds	Bottled water				Sports energy drink (e.g. Gatorade)		Milk				Good										Less than 30 mins		Easy	2019-05-03	2		NA
2017-01-10 14:41:00	2017-01-10 14:41:00	225	1014	9012017	2017-01-09	530	Poptarts And Almonds		All of it	Salmon Green Beans Squash Cucumbers Radishes Yogurt Olives		All of it	Tamal With Pork And Potatoes Peanut Butter And Jelly		All of it	Almonds olives dried fruit jerky											Good									Chloroquine	30 mins to 1 hour	Run	Challenging	2019-09-06	1	Soft and formed (like peanut butter)	2200
2017-01-11 02:29:00	2017-01-11 02:29:00	42446	1014	10012017	2017-01-10	530	Poptarts And Almonds		All of it	Subway 6 Inch Ham And Cheese With Tomatoes Peppers Cheese Olives And Pickles. Chips		All of it	Pork Brown Rice Mixed Vegetables Yogurt Cucumbers Tomato Soup Crackers		All of it	Almonds and olives poptart	Bottled water			Soda							Good				Tiredness						30 mins to 1 hour	Run and calesthenics	Very Challenging	2019-05-03	4	Soft and formed (like peanut butter)	2200
2017-01-14 11:24:00	2017-01-14 11:24:00	277	1014	12012017	2017-01-12	530	Poptarts Almonds		All of it	Crab Sandwhich Potato Salad Radishes Pickles Cucumbers Olives		All of it	Enchiladas Corn Lima Beans Pickles Cucumbers Mandarine Oranges		All of it	Almonds dried fruit	Bottled water				Sports energy drink (e.g. Gatorade)		Milk				Good				Tiredness					Antihistamine	30 mins to 1 hour	Run and calesthenics	Very Challenging	2019-05-03	3	Soft and formed (like peanut butter)	2130
2017-01-14 11:20:00	2017-01-14 11:20:00	291081	1014	13012017	2017-01-13	600	Poptarts And Almonds		All of it	Beef Cucumbers Pickles Corn Carrots Potatoes		All of it	Beef Beans Corn Cucumbers Olives Radishes Ice Cream		All of it	Almonds	Bottled water				Sports energy drink (e.g. Gatorade)		Milk				Good									Antihistamine	30 mins to 1 hour	Run and calesthenics	Challenging	2019-09-06	2	Soft and formed (like peanut butter)	2200
2017-01-15 11:47:00	2017-01-15 11:47:00	87776	1014	14012017	2017-01-14	630	Eggs Toast Potatoes Grapfruit Yogurt Oat Meal With Pecans Sugar And Cinnamon		All of it				Top Ramen Tangerine Almonds Cookies Chips		All of it	Cookies	Bottled water				Sports energy drink (e.g. Gatorade)						Good									Antihistamine	1 to 2 hours	Run	Very Challenging	2019-09-06	3	Soft and formed (like peanut butter)	2200
2017-01-17 20:58:00	2017-01-17 20:58:00	205801	1014	15012017	2017-01-15	630	Cereal With Milk And Almonds		All of it	Ramen Noodle Tangerine Cookies Peanut Butter And Jelly Sandwhich		All of it	Subway Club Sandwhich With Pickles Olives Peppers And Onions		All of it	Cookies and olives	Bottled water										Good									Antihistamine	Less than 30 mins	Walk	Easy	2019-09-06	3	Soft and formed (like peanut butter)	2230
2017-01-17 21:03:00	2017-01-17 21:03:00	294	1014	16012017	2017-01-16	730	Almonds Poptarts		All of it	Peanut Butter And Jelly Tangerine Cookies		All of it	Chicken Tetrazini Pickles Olives Rice Corn Ice Cream Cucumbers		All of it	Cookies	Bottled water				Sports energy drink (e.g. Gatorade)						Good									Chloroquine	1 to 2 hours	Run and calesthenics	Very Challenging	2019-09-06	2	Soft and formed (like peanut butter)	2130
2017-01-17 21:07:00	2017-01-17 21:07:00	251	1014	17012017	2017-01-17	530	Almonds Cereal And Milk		All of it	Salmon Stir Fry With Peppers Corn Sprouts Mushrooms Pickle Cucumbers Beets Yogurt		All of it	Ramen Noodle Cookies Chips		All of it	Chocolate and cake	Bottled water				Sports energy drink (e.g. Gatorade)						Good									Claritin	30 mins to 1 hour	Run and calesthenics	Very Challenging	2019-09-06	2	Hard and formed (like a cigar)	2130
2017-01-20 07:45:00	2017-01-20 07:45:00	265	1014	18012017	2017-01-18	532	Poptarts And Almonds		All of it	Subway Club Six Inch Sandwhich Potato Chips		All of it	Bean And Beef Burrito Rice Corn With Lima Beans Olives Cucumbers Canned Fruit Cocktail		All of it	Almonds cookies	Bottled water			Soda							Good									Claritin	30 mins to 1 hour	Run and calesthemics	Challenging	2019-09-06	2	Soft and formed (like peanut butter)	2130
2017-01-20 07:41:00	2017-01-20 07:41:00	172238	1014	19012017	2017-01-19	530	Yogurt Almonds		All of it	Rice Jambalaya Carrots Cucumbers Olives Ice Cream Walnuts		All of it	Fish Rice Carrots Cucumbers Beets Olives Peaches Yogurt		All of it		Bottled water						Milk				Good									Claritin	30 mins to 1 hour	Run and calesthenics	Challenging	2019-09-06	3	Soft and formed (like peanut butter)	2230
2017-01-22 21:02:00	2017-01-22 21:02:00	268	1014	20012017	2017-01-20	530	Cereal And Milk Almonds		All of it	Olives Cucumbers Peaches Fish Rice Yogurt		All of it	Pork Steak Chips Potato Salad Peppers And Other Veggies Cake		All of it	Chocolate candy	Bottled water			Soda							Good									Antihistamine	30 mins to 1 hour	Run and calesthenics	Challenging	2019-09-06	3	Soft and formed (like peanut butter)	2200
2017-01-22 20:54:00	2017-01-22 20:54:00	201	1014	21012017	2017-01-21	630	Cereal Almonds Milk		All of it	Rice Beans Steak Sausage Plantain		All of it	Bananna Hot Pocket Almonds		All of it	Almonds chips	Bottled water			Soda			Milk				Good									Antihistamine	Less than 30 mins	Run	Very Challenging	2019-09-06	4	Soft and formed (like peanut butter)	2200
2017-01-22 20:57:00	2017-01-22 20:57:00	194	1014	22012017	2017-01-22	700	Poptarts Almonds		All of it	Pasta With Tomato Sauce Hot Pocket Sandwich Banana		All of it	Ravioli And A Hot Pocket Sandwhich Banana		All of it	Almonds and dried fruit	Bottled water										Good									Antihistamines	Less than 30 mins	Walk	Easy	2019-09-06	3	Soft and formed (like peanut butter)	2100
2017-01-28 22:25:00	2017-01-28 22:25:00	194	1014	26012017	2017-01-26	515	Poptarts Almonds		All of it	Poptart Almonds		All of it	Chickem Olives Cucumbers Peaches Boiled Egg Rice Carrots		All of it	Almonds	Bottled water				Sports energy drink (e.g. Gatorade)						Good									Antihistamine	Less than 30 mins	Run	Challenging	2019-09-06	2	Soft and formed (like peanut butter)	2200
2017-01-26 22:25:00	2017-01-26 22:25:00	226	1014	27012017	2017-01-25	515	Poptarts almonds			Poptarts Almonds		All of it	Olives Cucumbers Sparagus Soup Sausage Sauerkraut Peaches		All of it	Almonds cake	Bottled water										Good									Antihistamine		Run	Challenging	2019-05-03	2	Soft and formed (like peanut butter)	2145
2017-01-28 22:21:00	2017-01-28 22:21:00	175	1014	27012017	2017-01-27	530	Yogurt Cereal Almonds		All of it	Pupusas Encurtido		All of it	Pizza		All of it	Almonds	Bottled water			Soda	Sports energy drink (e.g. Gatorade)						Good										30 mins to 1 hour	Run and calesthenics	Challenging	2019-09-06	3	Soft and formed (like peanut butter)	2200
2017-01-28 22:28:00	2017-01-28 22:28:00	183	1014	28012017	2017-01-28	550	Almonds		All of it	Plantain Chips Cucumbers Rice Hamburger		All of it	Pasta With Tomato Sauce		All of it	Almonds	Bottled water			Soda	Sports energy drink (e.g. Gatorade)						Good									Claritin	1 to 2 hours	Run and calesthenics	Very Challenging	2019-09-06	2	Soft and formed (like peanut butter)	2100
2017-01-29 19:56:00	2017-01-29 19:56:00	77322	1014	29012017	2017-01-29	645	Omellet With Cheese Tomatp And Mushrooms. Orange Watermelon Pineapple Oatmeal With Sugar And Cinnomon Mixed Nuts Hash Browns		All of it	Hotpocket		All of it	Fish Macarony And Cheese Cucumbers Olives Grapefruit Ice Cream With Walnuts And Caramel		All of it	Walnuts	Bottled water				Sports energy drink (e.g. Gatorade)						Good									Claritin	Less than 30 mins	Walk	Easy	2019-09-06	3	Soft and formed (like peanut butter)	2130
2017-02-01 08:24:00	2017-02-01 08:24:00	217659	1014	30012017	2017-01-30	530	Yogurt And Cereal Almonds		All of it	Chicken Potatoes Pickles Olives Cucumbers Peaches Ice Cream		All of it	Pork Chop Vegetables Soup Minestrone Macaroni Salad Peaches Yogurt		All of it	Almonds	Bottled water				Sports energy drink (e.g. Gatorade)						Good							Muscle strain		Ibuprofen chlorquine claritin	30 mins to 1 hour	Run	Challenging	2019-09-06	3	Soft and formed (like peanut butter)	2130
2017-02-04 07:05:00	2017-02-04 07:05:00	266	1014	1022017	2017-02-01	530	Poptarts Almonds		All of it	Tortillas		All of it	Cucumbers Peaches Olives Rice Chicken Ice Cream Walnuts		All of it	Almonds	Bottled water				Sports energy drink (e.g. Gatorade)						Good									Claritin	30 mins to 1 hour	Run	Challenging	2019-09-06	3	Soft and formed (like peanut butter)	2100
2017-02-04 07:08:00	2017-02-04 07:08:00	230	1014	2022017	2017-02-02	530	Poptarts Almonds		All of it	Salisbury Steak Potatoes Gravy Cucumbers Olives Ice Cream Peaches Vegetables		All of it	Plantains Beef Beans Rice Cheese		All of it		Bottled water			Soda	Sports energy drink (e.g. Gatorade)						Good									Claritin	30 mins to 1 hour		Challenging	2019-09-06	3	Soft and formed (like peanut butter)	2100
2017-02-04 07:13:00	2017-02-04 07:13:00	249	1014	3022017	2017-02-03	530	Poptarts Almonds		All of it	Ham And Noodle Casserole With Vegetables Corn Tomatoes Green Beans Chicken Cucumbers Olives Peaches		All of it	Pork Tamal Chips Olives		All of it	Almonds candy	Bottled water			Soda	Sports energy drink (e.g. Gatorade)						Good									Claritin	30 mins to 1 hour	Run and calesthenics	Very Challenging	2019-09-06	3	Soft and formed (like peanut butter)	2030
2017-03-04 08:57:00	2017-03-04 08:57:00	239	1014	3022017	2017-03-02	530	Poptarts Cashews		All of it	Chicken Olives Macaroni Salad Cucumbers Yogurt		All of it	Peanut Butter Sandwhich Cashews Dried Fruit And Nuts		All of it	Candy	Bottled water										Good							Muscle strain		None	30 mins to 1 hour	Run	Challenging	2019-09-06	3	Soft and formed (like peanut butter)	2130
2017-02-04 22:15:00	2017-02-04 22:15:00	54159	1014	4022017	2017-02-04	630	Almonds Apple Poptarts		All of it	Peanut Butter And Jelly Sandwhich Salami Sandwhich Olives Dried Fruit		All of it	Tuna Sandwhich With Olives Pickles Tomatoes And Peppers		All of it	Almonds	Bottled water				Sports energy drink (e.g. Gatorade)						Good									Antihistamines	1 to 2 hours	Run and calesthenics	Very Challenging	2019-09-06	4	Soft and formed (like peanut butter)	2100
2017-02-07 19:46:00	2017-02-07 19:46:00	206	1014	5022017	2017-02-05	700	Nothing. Fasted			Nothing. Fasted			Shrimp Rice Vegetables Cucumbers Beets Olives Ice Cream Yogurt Hot Pocket		All of it	Almonds and olives	Bottled water				Sports energy drink (e.g. Gatorade)						Good									Antihistamine	Less than 30 mins	Walk	Easy	2019-05-03	2	Soft and formed (like peanut butter)	2130
2017-02-07 19:42:00	2017-02-07 19:42:00	229	1014	6022017	2017-02-06	530	Poptarts Almonds Banana		All of it	Fish Mixed Vegetables Rice Cucumbers Olives Radishes Watermelon Ice Cream		All of it	Pasta With Tomato Sauce Hot Pocket With Pepperoni Olives		All of it	Almonds candy	Bottled water				Sports energy drink (e.g. Gatorade)						Good					Runny or blocked nose				Antihistamine and chloroquine	30 mins to 1 hour	Run and calesthenics	Challenging	2019-09-06	4	Soft and formed (like peanut butter)	2200
2017-02-07 19:39:00	2017-02-07 19:39:00	249803	1014	7022017	2017-02-07	530	Poptarts And Almonds		All of it	Stir Fry Beef With Green Peppers Tomatoes Mushrooms Cheese Sprouts Rice Green Beans And Canned Muxed Fruit		All of it	Ham And Cheese Sandwhich Corn Potatoe And Bacon Soup Cucumbers Pickles Mixed Fruit Ice Cream Walnuts Strawberries		All of it	Almonds peppermint candy	Bottled water				Sports energy drink (e.g. Gatorade)						Good		Gastrointestinal issues							Antihistamine	30 mins to 1 hour	Run and calesthenics	Very Challenging	2019-09-06	3	Soft and formed (like peanut butter)	2100
2017-02-10 21:16:00	2017-02-10 21:16:00	384	1014	8022017	2017-02-08	500	Poptarts And Almonds		All of it	Turkey Sub Sandwich Chips		All of it	Pasta With Tomato Sauce Banana Yogurt		All of it	Almonds	Bottled water				Sports energy drink (e.g. Gatorade)						Good									Antihistamine		Run	Very Challenging	2019-09-06	3	Soft and formed (like peanut butter)	2200
2017-02-10 21:09:00	2017-02-10 21:09:00	177	1014	9022017	2017-02-09	530	Poptarts And Almonds		All of it	Pizza		All of it	Ramen Noodle Banana Hot Pocket		All of it	Almonds	Bottled water				Sports energy drink (e.g. Gatorade)						Good									Antihistamines	30 mins to 1 hour	Run and calthenics	Very Challenging	2019-09-06	3	Soft and formed (like peanut butter)	2100
2017-02-10 21:06:00	2017-02-10 21:06:00	264025	1014	10022017	2017-02-10	530	Poptarts Banana Almonds		All of it	Poptarts And Rosquillas		All of it	Shrimp Linguini Watermelon Yogurt Squash Olives And Cucumbers		All of it	Almonds	Bottled water			Soda							Good				Tiredness					Claritin	30 mins to 1 hour	Run calesthenics	Challenging	2019-05-03	3	Soft and formed (like peanut butter)	2000
2017-02-12 12:32:00	2017-02-12 12:32:00	141356	1014	11022017	2017-02-11	630	Banana Poptarts Almonds		All of it	Shrimp Linguini Corn Rice Grapefruit Cucumbers Olives Tomato Radishes Yogurt		All of it	Steak Potatoes Gravy Cucumbers Radishes Olives Corn Grapefruit Ice Cream Walnuts Strawnerries		All of it	Almonds dried fruit	Bottled water				Sports energy drink (e.g. Gatorade)						Good										1 to 2 hours	Run	Very Challenging	2019-09-06	2	Soft and formed (like peanut butter)	2215
2017-02-15 13:49:00	2017-02-22 20:55:00	338	1014	12022017	2017-02-12	700	Eggs Pankakes Hash Browns Canteloupe Melon Yogurt		All of it	Salami Sandwhich Peanut Butter And Jelly Samdwhich		All of it	Pork Steak Chips Mac And Cheese		All of it	Almonds candy	Bottled water			Soda							Good									Antihistamine	30 mins to 1 hour	Walk	Easy	2019-09-06	2	Soft and formed (like peanut butter)	2200
2017-02-15 13:43:00	2017-02-22 20:55:00	255	1014	13022017	2017-02-13	530	Poptarts Almonds		All of it	Lasagna Spinach Cucumbers Olives Tomatos Vegetable Yogurt		All of it	Pasta With Tomato Sauce Salami Sandwhich		All of it		Bottled water										Good									Chloroquine	30 mins to 1 hour	Run calesthenics	Challenging	2019-09-06	2	Soft and formed (like peanut butter)	2100
2017-02-15 13:39:00	2017-02-22 20:55:00	375	1014	14022017	2017-02-14	530	Poptarts Almonds		All of it	Chicken Sandwhich Cucumber Olives Pickles Yogurt Ice Cream		All of it	Yogurt Pork Chop Vegetables Olives Potato Salad		All of it	Almonds chocolate	Bottled water				Sports energy drink (e.g. Gatorade)						Good										30 mins to 1 hour	Run	Very Challenging	2019-09-06	2	Soft and formed (like peanut butter)	2200
2017-02-22 21:00:00	2017-02-22 21:00:00	276	1014	19022017	2017-02-19	700	Eggs Potatoes Peaches Oatmel Pancakes Yogurt		All of it	Yogurt		All of it	Subway Sandwhich With Roast Beef Tomatos Peppers Olives Flatbread		All of it	Almonds	Bottled water										Good										Less than 30 mins	Walk	Easy	2019-09-06	2	Soft and formed (like peanut butter)	2200
2017-02-22 14:34:00	2017-02-22 20:55:00	1448	1014	20022017	2017-02-20	540	Eggs Hasbrowns Pancakes Oatmeal Pecans Sugar Cinnamon Yogurt		All of it	Yogurt Walnuts		All of it	Fish Corn Beans Potatoes Icecream Peaches Cicimbers Olives		All of it	Walnuts	Bottled water				Sports energy drink (e.g. Gatorade)						Good									Antihistamine	1 to 2 hours	Run	Very Challenging	2019-09-06	2	Soft and formed (like peanut butter)	2100
2017-02-22 14:10:00	2017-02-22 20:55:00	307	1014	21022017	2017-02-21	530	Cereal And Milk		All of it	Subway Ham And Cheese With Onions Peppers Olives Tomatoes Pickles		All of it	Carrots Cucmbers Olives Rasishes Egg Salad Sandwich Ice Cream Walnuts		All of it	Granola bars	Bottled water				Sports energy drink (e.g. Gatorade)						Good									Chloroquine	30 mins to 1 hour	Run and calesthenics	Challenging	2019-09-06	4	Soft and formed (like peanut butter)	2130
2017-02-22 20:55:00	2017-02-22 20:55:00	22837	1014	22022017	2017-02-22	530	Cereal And Milk		All of it	Shrimp Jambalaya Rice Corn Green Beans Cucumbers Fruit Salad Olives		All of it	Granola Bar Peanut Butter And Jelly Sandwhich Olives Dried Fruit		All of it	Granola bar chocolate jerky corn nuts	Bottled water				Sports energy drink (e.g. Gatorade)						Good									Claritin	30 mins to 1 hour	Run and calesthenics	Challenging	2019-09-06	4	Soft and formed (like peanut butter)	2100
2017-02-23 20:52:00	2017-02-23 20:52:00	85909	1014	23022017	2017-02-23	530	Cereal And Milk Yogurt		All of it	Beef Fajitas Cucumbers Corn Tortillas French Fries		All of it	Sandwhich Roast Beef Tomatoes Lettuce Chips Cake		All of it	Pop corn and chocolate	Bottled water			Soda							Good										30 mins to 1 hour	Run and calesthenics	Challenging	2019-09-06	4	Soft and formed (like peanut butter)	2100
2017-02-27 20:10:00	2017-02-27 20:10:00	343099	1014	25022017	2017-02-25	540	Cereal Yogurt Almonds Granola Bar		All of it	Ramen Noodles Chips		All of it	Rice Beans Beef Peppers		All of it	Dried fruit	Bottled water			Soda							Good		Gastrointestinal issues							Imodium	1 to 2 hours	Run	Very Challenging	2019-09-06	3	Loose and unformed (like a thick milkshake)	2230
2017-02-27 20:13:00	2017-02-27 20:13:00	193	1014	26022017	2017-02-26	730	Poptarts Almonds		All of it	Popcorn Granola Bar Cashews Hot Pocket Sausage And Cheese		All of it	Chicken Fried Plantains Beans And Cheese		All of it	Cashews	Bottled water				Sports energy drink (e.g. Gatorade)						Good									None	Less than 30 mins	Walk	Easy	2019-09-06	1	Soft and formed (like peanut butter)	2100
2017-02-27 20:19:00	2017-02-27 20:19:00	307	1014	27022017	2017-02-27	530	Poptarts And Cashews		All of it	Fish Squash Carrots Peas Olives Ice Cream With Walnuts And Straberries Macaroni Sald		All of it	Ham And Cheese Sandwhich Tomato Cucumbers Olives Pickles Bread Pudding Potatoes Squash		All of it		Bottled water				Sports energy drink (e.g. Gatorade)						Good									Chloroquine	30 mins to 1 hour	Run and calesthenics	Very Challenging	2019-09-06	3	Soft and formed (like peanut butter)	2130
2017-03-05 13:35:00	2017-03-05 13:35:00	217	1014	1032017	2017-03-01	530	Cereal And Nuts With Milk		All of it	Subway Ham And Cheese On Multi Grain Flat Bread With Peppers Olives Tomatos Pickles And Cucumber		All of it	Pork Chop Olives Tomatoes Rice Vegetables Cucumbers Ice Cream		All of it	Nuts jerky	Bottled water										Good										30 mins to 1 hour	Run	Very Challenging	2019-09-06	3	Soft and formed (like peanut butter)	2100
2017-03-04 08:53:00	2017-03-04 08:53:00	272	1014	3032017	2017-03-03	20	Cookies		All of it	Poptarts Cashews		All of it	Meat Ball Rice Cucumbers Olives Tomatoes Corn Lima Beans Peaches Ice Cream Strawberries		All of it	Cookies cashews	Bottled water				Sports energy drink (e.g. Gatorade)			Fruit juice			Ill		Gastrointestinal issues		Tiredness					Imodium pepto bismol claitin	Less than 30 mins	Walk	Easy	2019-09-06	4	Soft and formed (like peanut butter)	2000
2017-03-05 13:32:00	2017-03-05 13:32:00	102866	1014	4032017	2017-03-04	535	Poptarts And Cashews Yogurt		All of it	Roast Beef Potatoes Gravy Peas Celery Tomatos Olives Cucumbers Garbanzos Radishes Ice Cream		All of it	Grilled Cheese Sandwhiches Tomato Soup Radishes Tomatoes Olives Cucumbers Ice Cream		All of it	Pop corn and jerky dried fruits and nuts	Bottled water				Sports energy drink (e.g. Gatorade)						Good										1 to 2 hours	Run and calesthenics	Challenging	2019-09-06	3	Soft and formed (like peanut butter)	2100
2017-03-08 20:47:00	2017-03-08 20:47:00	225	1014	5032017	2017-03-05	800	Nothing. Fasting			Nothing Fasting			Shrimp Scampi Rice Cucumbers Olives Tomatoes Peaches Ice Cream		All of it	Jerky	Bottled water										Good										30 mins to 1 hour	Walk	Easy	2019-05-03	2	Soft and formed (like peanut butter)	2100
2017-03-08 20:53:00	2017-03-08 20:53:00	354	1014	6032017	2017-03-06	530	Poptarts Cashews		All of it	Steak Tomatos Rice Corn Cucumbers Olives Ice Cream		All of it	Ham And Cheese Panini Pasta Salad Cucumbers Tomato Olives Ice Cream		All of it	Jerky cashews	Bottled water										Good										30 mins to 1 hour	Run	Challenging	2019-09-06	3	Soft and formed (like peanut butter)	2100
2017-03-08 20:59:00	2017-03-08 20:59:00	348	1014	7032017	2017-03-07	530	Cereal And Milk Yogurt Almonds		All of it	Salami Sandwhich Dried Fruits And Nuts Yogurt Jerky		All of it	Cereal Jerky Fig Newtons Dried Fruits And Nuts		All of it	Jerky	Bottled water				Sports energy drink (e.g. Gatorade)						Good									Chloroquine	1 to 2 hours	Run	Challenging	2019-09-06	3	Soft and formed (like peanut butter)	2200
2017-03-08 21:03:00	2017-03-08 21:03:00	243	1014	8032017	2017-03-08	500	Cereal Nuts Olives		All of it	Peanut Butter And Jam Sandwhich Jerky		All of it	Seafood Mix Rice Cookies Yogurt Olives Carrots Cucumbers		All of it	Jerky	Bottled water										Good		Gastrointestinal issues							Imodium	30 mins to 1 hour	Run	Challenging	2019-09-06	3	Loose and unformed (like a thick milkshake)	2100
2017-03-10 09:31:00	2017-03-11 02:29:00	131261	1014	9032017	2017-03-09	530	Cereal Milk Almonds Fig Bars		All of it	Stuffed Bell Pepper Rice Corn Beans Cucumbers Peaches Olives Tomatoes		All of it	Chicken Rice Cucumbers Olives Peaches Rice Corn		All of it	Fig bars almonds	Bottled water										Good				Tiredness						30 mins to 1 hour	Run	Challenging	2019-09-06	2	Soft and formed (like peanut butter)	2100
2017-03-11 02:29:00	2017-03-11 02:29:00	23147	1014	10032017	2017-03-10	530	Poptarts Almonds		All of it	Pork Mac And Cheese Cucumber Tomato Orange Slices Corn Bread		All of it	Fig Newtons Jerky Yogurt Popcorn		All of it		Bottled water				Sports energy drink (e.g. Gatorade)						Good										30 mins to 1 hour	Run and calesthenics	Challenging	2019-09-06	3	Soft and formed (like peanut butter)	2100
2017-03-17 22:29:00	2017-03-17 22:29:00	251	1014	14032017	2017-03-14	530	Poptarts Yogurt Almonds		All of it	Tostadas With Tortilla Chicken Beans Tomatoes Vegetables		All of it	Enchiladas With Tortillas Chicken Rice Beans Tomatoes Cheese		All of it	Chocolate	Bottled water			Soda							Good									Chloroquine	30 mins to 1 hour	Run	Challenging	2019-09-06	2	Soft and formed (like peanut butter)	2200
2017-03-17 22:25:00	2017-03-17 22:25:00	313	1014	15032017	2017-03-15	630	Melon Eggs Plantains Cheese Pastry		All of it	Chicken Pork Rice Sausage		All of it	Rice Fish Vegetables		All of it		Bottled water			Soda							Good										30 mins to 1 hour	Run	Challenging	2019-09-06	2	Soft and formed (like peanut butter)	2230
2017-03-17 22:20:00	2017-03-17 22:20:00	307	1014	16032017	2017-03-16	730	Eggs Pineapple Melon Potatoes Yogurt		All of it	Nothing			Crab Sandwich Turkey And Cheese Sandwhich Cucumbers Potatoe Salad Olives Tomatoes Ice Cream		All of it	Potato chips fig newtons	Bottled water			Soda				Fruit juice			Good		Gastrointestinal issues							Imodium	30 mins to 1 hour	Run	Challenging	2019-09-06	2	Soft and formed (like peanut butter)	2200
2017-03-17 22:15:00	2017-03-17 22:15:00	220	1014	17032017	2017-03-17	545	Oatmeal Fig Newtons Yogurt Banana		All of it	Tuna Sandwhich With Tomatoes Cheese Pickles Olives		All of it	Lean Cuisine Panini Sandwhich Fig Newtons Cucumbers		All of it	Almonds and jerky	Bottled water										Good									Ibuprofen	30 mins to 1 hour	Run	Very Challenging	2019-09-06	2	Soft and formed (like peanut butter)	2130
2017-03-20 10:45:00	2017-03-28 22:44:00	216912	1014	18032017	2017-03-18	515	Oatmeal Banana Yogurt		All of it	Plantains Beef Rice Tortillas Beans		All of it	Pupusas		All of it		Bottled water			Soda							Good										30 mins to 1 hour	Walk	Moderate	2019-09-06	2	Soft and formed (like peanut butter)	2200
2017-03-20 10:47:00	2017-03-28 22:44:00	176	1014	19032017	2017-03-19	700	Nothing. Fasting.			Nothing. Fasting			Beans Cheese Beef Chicken Plantains Eggs Tortillas Cookies		All of it		Bottled water			Soda							Good									Pepto bismol	1 to 2 hours	Walk	Moderate	2019-05-03	1	Soft and formed (like peanut butter)	2200
2017-03-28 22:49:00	2017-03-28 22:49:00	319	1014	27032017	2017-03-27	530	Granola Bar Almonds		All of it	Cucumbers Tomatoes Olives Crab Sandwhich Cheese Potato Salad. Yams		All of it	Mac And Cheese Olives Crackers Fig Bars		All of it	Candy	Bottled water										Good									Chlorquine	30 mins to 1 hour	Run	Challenging	2019-09-06	3	Soft and formed (like peanut butter)	2130
2017-03-28 22:44:00	2017-03-28 22:44:00	231	1014	28032017	2017-03-28	530	Oatmeal And Breakfast Bar		All of it	Chicken Rice Cucumbers Olives Pickles Oranges Carrots Celery Ice Cream		All of it	Crackers Jerky Popcorn Granola Bar		All of it		Bottled water										Good									Tums	30 mins to 1 hour	Run	Challenging	2019-09-06	5	Soft and formed (like peanut butter)	2100
2017-03-29 21:18:00	2017-03-29 21:18:00	22640	1014	29032017	2017-03-29	500	Peanut Butter Granola Bar		All of it	Peas And Mixed Vegetable Turkey Pot Pie Cucumbers Tomatoes Olives		All of it	Steak Potatoes Beets Cucumbers Tomatoes Olives Ice Cream		All of it		Bottled water										Good										30 mins to 1 hour	Run	Challenging	2019-09-06	3	Soft and formed (like peanut butter)	2100
2017-04-02 21:01:00	2017-04-02 21:01:00	235	1014	1042017	2017-04-01	400	Eggs Pancakes Yogurt Hashbrowns		All of it	Apple Yogurt Chips		All of it	Cucumbers Tomatoes Chicken Chips Olives		All of it		Bottled water				Sports energy drink (e.g. Gatorade)						Good				Tiredness						1 to 2 hours		Challenging	2019-09-06	3	Soft and formed (like peanut butter)	2300
2017-04-02 21:04:00	2017-04-02 21:04:00	224	1014	2042017	2017-04-02	750	Eggs Hasbrowns Pancakes Oatmeal Pecans		All of it	Yogurt		All of it	Beef And Noodles Cucumbers Tomatoes Ice Cream Mixed Fruit Salad		All of it		Bottled water													Headache	Tiredness					Ibuprofen and claritin	30 mins to 1 hour	Walk	Easy	2019-09-06	3	Soft and formed (like peanut butter)	2130
1970-01-01 22:40:00	2017-05-08 11:02:00	66947	1014	26042017	2017-04-26	530	Almonds Oat Meal		All of it	Chicken Bread Chips		All of it		289f1fac-ad8c-4ccb-b15c-e9c3132caa6e.jpg	All of it	Almonds bread	Bottled water				Sports energy drink (e.g. Gatorade)						Good										30 mins to 1 hour	Run	Challenging	2019-05-03	2	Soft and formed (like peanut butter)	2100
1970-01-03 03:03:00	2017-05-08 11:02:00	102165	1014	27042017	2017-04-27	530	Pop Tarts Almonds		All of it	Potato Salad Ham Sandwhich Cheese Tomatoes Lettuce Olives Cucumbers Peaches Yogurt		All of it	Cold Cut Tomato Olive Peppers Subway Sandwhich		All of it	Goldfish crackers	Bottled water				Sports energy drink (e.g. Gatorade)						Good										30 mins to 1 hour	Run	Very Challenging	2019-09-06	3	Soft and formed (like peanut butter)	2100
1970-01-03 03:06:00	2017-05-08 11:02:00	184	1014	28042017	2017-04-28	330	Poptarts Almonds		All of it	Beans Rice Meat Plantains Cheese Tortilla		All of it	Mac And Cheese		All of it	Goldfish crackers	Bottled water			Soda							Good										30 mins to 1 hour	Run	Challenging	2019-05-03	3	Soft and formed (like peanut butter)	2100
1970-01-04 06:48:00	2017-05-08 11:02:00	99720	1014	29042017	2017-04-29	430	Poptarts Almonds		All of it	Roast Beef Peas Celery Radishes Tomatos Cucumbers Olives Watermelon Yogurt Ice Cream		All of it	Trout Spagetti With Mest Sause Garlic Bread Watermelon Cucumbers Olives Yogurt		All of it	Goldfish crackers	Bottled water				Sports energy drink (e.g. Gatorade)						Good									Claritin	1 to 2 hours	Run and calesthenics	Very Challenging	2019-09-06	3	Soft and formed (like peanut butter)	2130
1970-01-06 06:40:00	2017-05-08 11:02:00	172357	1014	30042017	2017-04-30	730	Nothing. Fasting.			Nothing. Fasting.			Oatmeal. Macaroni And Cheese. Pop Tarts. Gold Dish Crackers.		All of it		Bottled water						Milk				Good										30 mins to 1 hour	Walk	Easy	2019-05-03	2	Soft and formed (like peanut butter)	2050
1970-01-06 06:44:00	2017-05-08 11:02:00	239	1014	1052017	2017-05-01	530	Poptarts Almonds		All of it	Rice Asparagus Chopped Beef In Stew. Beets Grapefruit. Olives Pickle Ice Cream Strawberries		All of it	Steak. Plantains. Beans. Rice. Flan.		All of it	Candy	Bottled water			Soda							Good									Chloroquine	30 mins to 1 hour	Run and calesthemics	Challenging	2019-09-06	2	Hard and formed (like a cigar)	2100
1970-01-08 15:00:00	2017-05-08 11:02:00	294	1014	2052017	2017-05-02	530	Poptart Almonds		All of it	Cucumbers Olives Radishes Fish Rice Grapfruit Yogurt		All of it	Peanut Butter Sandwhich Chips Almonds Fig Bars		All of it		Bottled water										Good					Runny or blocked nose				Cetirizine	1 to 2 hours	Run and calesthenics	Very Challenging	2019-09-06	2	Soft and formed (like peanut butter)	2100
1970-01-08 14:55:00	2017-05-08 11:02:00	202226	1014	3052017	2017-05-03	530	Cereal Milk Almonds		All of it	Seafood Soup Rice Tomato Cucumber Peaches Olives		All of it	Roast Beef Rice Mixed Vegetables Cucumbers Tomato Peaches Olives Fruit And Coconut Salad I E Cream		All of it	Potato chips	Bottled water										Good					Runny or blocked nose				Cetitizine	30 mins to 1 hour	Run	Challenging	2019-05-03	3	Soft and formed (like peanut butter)	2230
1970-01-10 06:07:00	2017-05-08 11:02:00	140831	1014	4052017	2017-05-04	500	Poptarts Almonds		All of it	Plantains Sausage Eggs Bread		All of it	Fish French Fries		All of it	Ice cream cookies	Bottled water			Soda				Fruit juice			Good		Gastrointestinal issues							Cetirizine imodium	Less than 30 mins	Walk	Easy	2019-05-03	2	Soft and formed (like peanut butter)	2100
1970-01-10 06:11:00	2017-05-08 11:02:00	227	1014	5052017	2017-05-05	500	Granola Bars Tortillas Eggs Plantains		All of it	Chicken Rice Tortillas		All of it	Granola Bars Crackers Cookies		All of it		Bottled water										Good					Runny or blocked nose				Cetirizine	Less than 30 mins	Walk	Easy	2019-05-03	2	Soft and formed (like peanut butter)	2100
2017-05-08 11:02:00	2017-05-08 11:02:00	2228	1014	6052017	2017-05-06	500	Granola Bars Tortillas Eggs Beans		All of it	Chicken Beans		All of it	Crackers Granola Bars Cookies		All of it	Candy	Bottled water			Soda																	Less than 30 mins	Walk	Easy	2019-05-03	2	Soft and formed (like peanut butter)	2100
2017-05-08 11:09:00	2017-05-08 11:09:00	400	1014	7052017	2017-05-07	500	Eggs Tortillas Bread Beans Salsa		All of it	Pastries Ham Cheese Nuts Peanuts Cookie		All of it	Sweet And Sour Chicken Rice		All of it		Bottled water			Soda							Ill		Gastrointestinal issues		Tiredness					Inuprofen pepto bismol	Less than 30 mins	Walk	Easy	2019-05-03	3	Soft and formed (like peanut butter)	2100
2016-11-24 23:06:00	2016-11-24 23:06:00	194	1014	23112019	2016-11-23	500	Poptarts		All of it	Subway Club 6 Inch Sandwhich And Chips		All of it	Peanut Butter Sandwhich Jerky Dried Fruit		All of it		Bottled water			Soda	Sports energy drink (e.g. Gatorade)						Good										30 mins to 1 hour	Run	Challenging	2019-05-03	3	Soft and formed (like peanut butter)	2100
2016-04-03 10:56:00	2016-04-03 10:56:00	212483	1015	3022016	2016-03-02	600	Scrambled Eggs, Bacon, Grapefruit, Wheat Toast		All of it	Power Bar, Raisins		All of it	Rice Curry Soup, Garden Salad With Raspberry Vinagrette, Watermelon, Slice Of Wheat Bread		All of it	Chocolate	Bottled water	Base purified water				Coffee or tea	Milk				Good									Doxycycline	30 mins to 1 hour		Moderate	2019-05-03	0		2345
2016-03-19 00:42:00	2016-03-27 23:53:00	90641	1015	18032016	2016-03-18	500	Oatmeal With Honey, Nuts, Raisins And Cranberries; Watermelon; Coffee & Milk		All of it	Fried Fish, Sweet Sauce, Brown Rice And Brussel Sprouts; Ice Cream With Nuts And Chocolate Syrup		3/4 of it	Quest Power Bar		All of it	Wheat thin crackers, Welch's fruit snack; piece of homemade candy	Bottled water	Base purified water				Coffee or tea	Milk				Good									Doxycycline	30 mins to 1 hour	Unit PRT	Moderate	2019-05-03	1	Hard and formed (like a cigar)	2230
2016-03-20 02:17:00	2016-03-27 23:53:00	92062	1015	3192016	2016-03-19	645	Omelette, Watermelon, Banana, Coffee With Milk & Water		All of it	Odawalle Protein Bar		All of it	Meatloaf, Mashed Potatoes, Cauliflower, Water, Garden Salad With Raspberry Vinigrette.		3/4 of it	Wheat thins, m&ms		Base purified water				Coffee or tea					Good										Less than 30 mins	Walk	Easy	2019-05-03	1	Hard and formed (like a cigar)	2100
2016-03-21 00:28:00	2016-03-27 23:53:00	79882	1015	20032016	2016-03-20	600	Oatmeal With Honey, Walnuts, Raisins And Cranberries; Coffee With Milk, Watermelon And Papaya		All of it	Beef, Wild Rice, Mixed Vegetables, Tortilla, Water, Tres Leche Cake		3/4 of it	Popcorn		All of it	M&Ms and an apple	Bottled water	Base purified water				Coffee or tea					Good									Doxycycline	30 mins to 1 hour	Walking and climbing steps	Easy	2019-05-03	1	Hard and formed (like a cigar)	2100
2016-03-22 00:39:00	2016-03-27 23:53:00	87076	1015	3212016	2016-03-21	505	Oatmeal, Walnuts, Cranberries, Raisins, Honey, Watermelon And Pineapple		All of it	Breaded Shrimp, Brown Rice, Carrots		3/4 of it	Odwalle Protein Bar		All of it	Trail mix, popcorn	Bottled water	Base purified water				Coffee or tea					Good										30 mins to 1 hour	Jog, APRT	Challenging	2019-05-03	1	Hard and formed (like a cigar)	2230
2016-03-23 00:16:00	2016-03-27 23:53:00	85013	1015	3222016	2016-03-22	505	Oatmeal, Raisins, Walnuts, Honey, Scrambled Eggs And Pico De Gallo		All of it	Spaghetti And Turkey Meatballs, Garden Salad With Raspberry Vinigratte		All of it	Quest Power Bar, Trail Mix		All of it	Triscuits and wheat thins	Bottled water	Base purified water				Coffee or tea					Good								Cramp	Doxycycline	Less than 30 mins	Walking	Easy	2019-05-03	1	Hard and formed (like a cigar)	2230
2016-03-24 00:21:00	2016-03-27 23:53:00	86707	1015	3232016	2016-03-23	505	Oikos Blueberry Greek Yogurt, Apple, Coffee & Creamer		All of it	Roast Turkey, Sweet Potato, Garden Salad With Raspberry Vinigratte.		All of it	Corn Chowser Soup, Garden Salad With Raspberry Vinigratte		All of it	Dark chocolate candy, granola bar - Fruit & nut	Bottled water	Base purified water				Coffee or tea					Good									Doxycycline and multivitamin	30 mins to 1 hour	Jogged, walked, pushups and situps	Challenging	2019-05-03	1	Hard and formed (like a cigar)	2230
2016-03-25 01:24:00	2016-03-27 23:53:00	90197	1015	24032016	2016-03-24	510	Scramblwd Eggs With Salsa, Bacon, Watermelon And Pineapple		All of it	Roast Pork, Mashed Potato, Corn And Lima Beans, Garden Salad		3/4 of it	Baked Fish, Rice, Potato, Mixedvegetables		3/4 of it	Licorice, chips with cheese and bean dip	Bottled water	Base purified water				Coffee or tea					Good									Doxycycline	Less than 30 mins	Walked	Easy	2019-05-03	1	Hard and formed (like a cigar)	2345
2016-03-26 00:57:00	2016-03-27 23:53:00	84772	1015	3252016	2016-03-25	545	Power Bar		All of it	Trail Mix		All of it	Salmon, Mixed Vegetables, Rice		3/4 of it	Cookie, welch's fruit snacks	Bottled water	Base purified water				Coffee or tea					Good									Doxycycline	Less than 30 mins	Walking	Easy	2019-05-03	0		2300
2016-03-27 23:53:00	2016-03-27 23:53:00	200	1015	3262016	2016-03-26	700	Power Bar		All of it	Salmon, Rice, Mixed Vegetables		3/4 of it	Trail Mix		All of it	Dark chocolate, triscuit crackers	Bottled water	Base purified water				Coffee or tea					Good									Doxycycline	Less than 30 mins	Walking	Easy	2019-05-03	1	Hard and formed (like a cigar)	0
2016-03-27 23:57:00	2016-03-27 23:57:00	252	1015	3272016	2016-03-27	645	Egg White Omelette With Tomato, Onion, Jalepeno Pepper, Cheese And Mixed Vegetables		All of it	Beoiled Fish, Brown Rice, Garden Salad, Ice Cream		All of it	Trail Mix		All of it	Dark chocolate		Base purified water				Coffee or tea	Milk				Good									Doxycycline	30 mins to 1 hour	Walking and jog	Moderate	2019-05-03	1	Hard and formed (like a cigar)	2330
2016-03-29 00:02:00	2016-03-29 00:02:00	86679	1015	3282016	2016-03-28	510	Oatmeal, Honey, Walnuts And Raisins; Watermelon And Papaya		All of it	Rice And Beans, Cooked Spinach, Garden Salad With Raspberry Vinagraite		All of it	Garden Salad With Italian Dressing, Watermelon		All of it	Dark chocolate, Welch's fruit snacks, white cheddar cheese	Bottled water	Base purified water				Coffee or tea	Milk				Good									Doxycycline	30 mins to 1 hour	Jog	Challenging	2019-05-03	1	Hard and formed (like a cigar)	2230
2016-03-31 00:36:00	2016-03-31 00:36:00	174861	1015	3292016	2016-03-29	510	Oatmeal, Walnuts, Raisins, Cinnamon And Honey; Watermelon And Papaya		All of it	Power Bar, Apple		All of it	Shrimp Linguini, Garden Salad And Watermelon		All of it	Popcorn, raisins, trailmix	Bottled water	Base purified water				Coffee or tea					Good									Doxycycline	Less than 30 mins	Walking	Easy	2019-05-03	0		2230
2016-03-31 00:43:00	2016-03-31 00:43:00	418	1015	3302016	2016-03-30	450	Oatmeal, Walnuts, Raisins, Cinnamon, Coconut, Honey; Watermelon And Papaya		All of it	Grilled Chicken Sandwich With Mayo, Lettuce And Tomato; French Fries; Frozen Watermelon Drink		1/2 of it	Cream of Brocoli Soup, Garden Salad With Rasp Vinigraite		All of it	DARK chocolate, mint candies	Bottled water					Coffee or tea		Fruit juice			Good				Tiredness					Doxycycline	Less than 30 mins	Walking	Easy	2019-05-03	0		2300
2016-03-31 23:54:00	2016-03-31 23:54:00	83492	1015	3312016	2016-03-31	510	Oatmeal, Raisins, Walnuts, Honey, Cinnamon, And Coconut. Grapefruit.		All of it	Baked Parmesan Fish, Creamed Asparagus, Brown Rice, Vanilla Ice Cream With Chocolate Syrup And Nut Toppings		All of it	Power Bar		All of it	Welch's fruit snack, dark chocolate, mints	Bottled water	Base purified water				Coffee or tea					Good				Tiredness					Doxycycline	Less than 30 mins		Easy	2019-05-03	1	Hard and formed (like a cigar)	2315
2016-04-04 09:20:00	2016-04-04 09:20:00	80676	1015	4032016	2016-04-03	645	Power Bar, Raisins		All of it	Beef Stroganoff, Mixed Vegetables, Watermelon		All of it	Watermelon And Blueberry Yogurt		All of it	Chocolate, almonds, triscuits	Bottled water					Coffee or tea					Good									Doxycycline	Less than 30 mins	Walking	Easy	2019-05-03	1	Hard and formed (like a cigar)	2430
2016-04-05 00:26:00	2016-04-05 00:26:00	54317	1015	4042016	2016-04-04	510	Oatmeal, Cinnamon, Walnuts, Coconut, Honey. Watermelon And Pineapple		All of it	Spinach Lasagna, Zuchini And Carrots		3/4 of it	Powerbar And Trailmix		All of it	Triscuits, mint candies	Bottled water	Base purified water				Coffee or tea	Milk				Good									Doxy	30 mins to 1 hour	Jogged	Moderate	2019-05-03	0		2245
2016-04-06 00:54:00	2016-04-06 00:54:00	88075	1015	4052016	2016-04-05	510	Oatmeal, Walnuts, Coconut, Cinnamon Amd Honey. Watermelon And Papaya.		All of it	Steak, Rice And Garden Salad With Rasp Vinigrette.		All of it	Tortilla Soup With Cheese, Garden Salad		All of it	Chocolate, mint candies	Bottled water	Base purified water				Coffee or tea	Milk				Good									Doxycycline	Less than 30 mins	Walked	Easy	2019-05-03	0		2330
2016-04-07 00:37:00	2016-04-07 00:37:00	85423	1015	4062016	2016-04-06	510	Scrambled Eggs, Bacon, Biscuit With Honey, Grapefruit		All of it	Pork Roast, Rice, Spinach, Garden Salad		All of it	Power Bar		All of it	Triscuits, chocolate	Bottled water	Base purified water				Coffee or tea					Good									Doxycycline and multivitamin	30 mins to 1 hour	Jogged	Challenging	2019-05-03	1	Hard and formed (like a cigar)	2245
2016-04-08 02:12:00	2016-04-08 02:12:00	92082	1015	4072016	2016-04-07	505	Oatmeal, Walnuts, Coconut, Honey & Cinnamon, Watermelon And Pineapple		All of it	Trailmix		All of it	Power Bar		All of it	Mints, trailmix, peanut m&ms	Bottled water	Base purified water				Coffee or tea	Milk				Good									Doxy	30 mins to 1 hour	Zumba	Moderate	2019-05-03	1	Hard and formed (like a cigar)	2245
2016-04-10 11:32:00	2016-04-10 11:32:00	206380	1015	4082016	2016-04-08	450	Scrambled Eggs, Pico De Gio, Wheat Toast, Bacon; Watermelon And Pineapple.		All of it	MRE-vegetable, Pasta; Wheat Bread With Peanut Butter		3/4 of it	Nothing			Nothing	Bottled water					Coffee or tea	Milk				Good									None	Less than 30 mins	Walked	Easy	2019-05-03	0		100
2016-04-10 11:36:00	2016-04-11 07:36:00	278	1015	4092016	2016-04-09	445	MRE - Chocolate Chip Poptart		All of it	Nothing			Pizza		All of it	M&M's, triscuits (cracked pepper and olive oil)	Bottled water					Coffee or tea					Good			Headache	Tiredness					None	Less than 30 mins	Walked	Easy	2019-05-03	1	Hard and formed (like a cigar)	2300
2016-04-11 07:36:00	2016-04-11 07:36:00	71970	1015	4102016	2016-04-10	715	Egg White Omelette With Cheese, Tomato, Onion, Green Pepper And Bacon. Watermelon And Pineapple.		All of it	Popcorn		All of it	Nothing			M&Ms	Bottled water					Coffee or tea	Milk				Good				Tiredness					Doxy	Less than 30 mins	Walked	Easy	2019-05-03	1	Hard and formed (like a cigar)	2245
2016-04-12 07:34:00	2016-04-12 07:34:00	86289	1015	4112016	2016-04-11	505	Oatmeal, Raisins, Coconut, Walnuts, Honey; Watermelon And Papaya		All of it	Garden Salad, Rice And Beans, Mixed Vegetables (carrots And Lima Beans); Ice Cream With Nuts And Cookie Bits		All of it	Rice, Baked Fish, Mixed Vegetables		3/4 of it	Chocolate, mints	Bottled water					Coffee or tea	Milk				Good									Doxy	30 mins to 1 hour	Jogged	Challenging	2019-05-03	0		2330
2016-04-13 08:07:00	2016-04-13 08:07:00	88366	1015	4122016	2016-04-12	505	Oatmeal, Walnuts, Raisins, Coconut, Cinnamon, Honey; Watermelon		All of it	Rice And Chicken/vegetable Stir Fry; Ice Cream With Nuts And Cookie Toppings		All of it	Yogurt And Triscuits		All of it	Dark chocolate and mints, licorce	Bottled water					Coffee or tea	Milk				Good									Doxy	Less than 30 mins	Walked	Easy	2019-05-03	0		2245
2016-04-14 00:25:00	2016-04-14 00:25:00	58673	1015	4132016	2016-04-13	510	Oatmeal, Walnuts, Raisins, Brown Sugar, Coconut; Watermelon		All of it	Flour Tortilla, Beans And Vegetables, Cheese		3/4 of it	Trail Mix		All of it	Mints, dark chocolate, triscuits	Bottled water					Coffee or tea	Milk				Good									Doxy	Less than 30 mins	Walked	Easy	2019-05-03	1	Hard and formed (like a cigar)	2345
2016-04-15 00:24:00	2016-04-15 00:24:00	86340	1015	4142016	2016-04-14	505	Oatmeal, Raisins, Walnuts, Brown Sugar, Cinnamon		All of it	Trail Mix And Raisins		All of it	Cream Of Chicken Soup, Garden Salad, Canned PeAches		All of it	Triscuits, peanut M&Ms, mints	Bottled water					Coffee or tea	Milk				Good				Tiredness					Doxy	Less than 30 mins	Walked	Easy	2019-05-03	1	Hard and formed (like a cigar)	2330
2016-04-16 00:15:00	2016-04-16 00:15:00	85866	1015	4152016	2016-04-15	515	Powerbar, Oatmeal With Walnuts, Raisins, Coconut, Honey, And Cinnamon, Watermelon And Cantelope		All of it	Trailmix		All of it	Parmesan Fish, Rice, Corn W/bacon, Garden Salad W/raspberry Vinnagrette		All of it	Dark chocolate covered cherries, mints	Bottled water					Coffee or tea	Milk				Good									Doxy and multivitamin	30 mins to 1 hour	Jog and walked	Challenging	2019-05-03	1	Hard and formed (like a cigar)	2230
2016-04-17 01:41:00	2016-04-17 01:41:00	91576	1015	4162016	2016-04-16	405	Scrambled Eggs And Bacon, Watermelon And Pineapple		All of it	Pork And Rice, Garden Salad, Icecream With Nut And Cookie Toppings		3/4 of it	Nothing			Dark chocolate, licorice	Bottled water					Coffee or tea					Good				Tiredness					Doxy and multivitamin	30 mins to 1 hour	Walked	Easy	2019-05-03	1	Hard and formed (like a cigar)	2230
2016-04-17 23:49:00	2016-04-17 23:49:00	79684	1015	4172016	2016-04-17	630	Omelette, Watermelon And Papaya		All of it	Asian Soup And Garden Salad, Ice Cream With Nuts And Cookie Topping		All of it	Guacomole And Chips		All of it	Chocolate, veggie chips	Bottled water					Coffee or tea	Milk				Good									Doxy and multivitamin	30 mins to 1 hour	Jogged and walked	Moderate	2019-05-03	1	Hard and formed (like a cigar)	2300
2016-04-19 07:41:00	2016-04-19 07:41:00	114687	1015	4182016	2016-04-18	505	Oatmeal, Raisins, Walnuts, Cinnamon, Honey, Coconut; Watermelon And Cantalope		All of it	Shrimp And Rice; Garden Salad		All of it	Nothing			Chocolate, veggie chips, mints; yogurt	Bottled water					Coffee or tea	Milk				Good									Doxy and multivitamin	30 mins to 1 hour	Walked, stretches	Easy	2019-05-03	1	Hard and formed (like a cigar)	2300
2016-04-19 23:28:00	2016-04-19 23:28:00	56867	1015	4192016	2016-04-19	505	Scrambled Eggs, Wheat Toast, Bacon; Watermelon		All of it	Beef Stroganof, Mashed Potatos, Corn & Lima Beans; Garden Salad		All of it	Blueberry Yogurt		All of it	Triscuits, ritz peanut butter crackers, dark chocolate	Bottled water					Coffee or tea	Milk				Good									Doxy and multivitamin	Less than 30 mins	Walked	Easy	2019-05-03	1	Hard and formed (like a cigar)	2300
2016-04-21 00:32:00	2016-04-21 00:32:00	90227	1015	4202016	2016-04-20	505	Scrambled Eggs, Bacon, Wheat Toast, Watermelon, Cantalope And Papaya		All of it	Rice, Turkey And Carrots		3/4 of it	Nothing			Fruit snacks, triscuits, chocolate	Bottled water					Coffee or tea					Good									Dozy and multivitamin	30 mins to 1 hour	Pushups, situps and 2-mile jog	Challenging	2019-05-03	1	Hard and formed (like a cigar)	2230
2016-04-23 00:50:00	2016-04-23 00:50:00	90986	1015	4222016	2016-04-22	505	Oatmeal With Walnuts, Cranberries, Raisins, Honey And Cinnamon; Watermelon		All of it	Nothing			Powerbar		All of it	Triacuits, peanut M&Ms, Welchs fruit snacks	Bottled water					Coffee or tea					Good									Doxy	30 mins to 1 hour	Zumba and walking	Moderate	2019-05-03	1	Hard and formed (like a cigar)	2200
2016-04-21 23:33:00	2016-04-21 23:33:00	82868	1015	4222016	2016-04-21	505	Oatmeal, Cranberries, Raisins, Walnuts, Cinnamon, Honey, Coconut; Watermelon And Pineapple		All of it	Clam Chowder Soup, Crackers And Garden Salad		All of it	Power Bar		All of it	Mints, chocolate, welchs fruit snacks	Bottled water					Coffee or tea					Good				Tiredness					Doxy	30 mins to 1 hour	Walked	Easy	2019-05-03	1	Hard and formed (like a cigar)	2315
2016-04-23 23:47:00	2016-04-23 23:47:00	82612	1015	4232016	2016-04-23	630	Scrambled Eggs, Wheat Toast, Bacon, Cottage Cheese, Jalepenas, Pico De Gallo		All of it	Nothing			Corn Chowder Soup And Garden Salad, Watermelon		All of it	Chocolate	Bottled water					Coffee or tea					Good									Doxy and multivitamin	30 mins to 1 hour	Walked	Easy	2019-05-03	1	Hard and formed (like a cigar)	2300
2016-04-24 23:51:00	2016-04-24 23:51:00	86680	1015	4242016	2016-04-24	630	Scrambled Eggs With Mixed Vegetables, Watermellon And Pancakes		All of it	Triscuits		All of it	Powerbar		All of it	Chocolate, fruit snacks	Bottled water					Coffee or tea					Good				Tiredness					Doxy and multivitamin	Less than 30 mins	Walked	Easy	2019-05-03	1	Hard and formed (like a cigar)	0
2016-04-26 00:32:00	2016-04-26 00:32:00	88852	1015	4252016	2016-04-25	505	Oatmeal, Walnuts, Raisins, Coconut, Sugar And Cinnamon; Watermelon		All of it	Pistachio Nuts And Power Bar		All of it	Chicken Noodle Soup, Garden Salad, Icecream With Nut And Chocolate Toppings		All of it	Chocolate and fruit snack - welches	Bottled water					Coffee or tea	Milk				Good									Doxy and multivitamin	1 to 2 hours	Jog, walked, zumba and aerobics	Challenging	2019-05-03	1	Hard and formed (like a cigar)	2230
2016-04-27 00:32:00	2016-04-27 00:32:00	86395	1015	4262016	2016-04-26	505	Oatmeal, Walnuts, Coconut, Raisins, Brown Sugar; Watermelon		All of it	Power Bar, Trailmix		All of it	Chicken Enchilada, Rice, Peas And Garden Salad		All of it	Dark chocolate, mints, fruit snacks	Bottled water					Coffee or tea	Milk	Fruit juice			Good									Doxy and MUlti vitamin	30 mins to 1 hour	Zumba and aerobics	Challenging	2019-05-03	1	Hard and formed (like a cigar)	2300
2016-04-28 00:34:00	2016-04-28 00:34:00	296	1015	4272016	2016-04-27	505	Oatmeal, Raisins, Oatmeal, Brown Sugar; Watermelon		All of it	Power Bar; Cherry Yogurt		All of it	Minestone Soup And Garden Salad With Italian Dressing; Watermelon		All of it	Pistachios, chocolate, mints	Bottled water					Coffee or tea	Milk	Fruit juice			Good		Gastrointestinal issues							Doxy and multivitamin	1 to 2 hours	Jogged, walked, zumba and aerobics	Challenging	2019-05-03	1	Hard and formed (like a cigar)	2300
2016-04-28 22:20:00	2016-05-02 00:26:00	78318	1015	4282016	2016-04-28	405	Hard Boiled Egg, Banana, Ham & Cheese Sandwich		All of it	Ham&cheese Sandwich, Cookies		3/4 of it	Salad, Chicken, Fries		3/4 of it	Banana	Bottled water							Fruit juice			Good				Tiredness					Doxy	Less than 30 mins	Walked	Easy	2019-05-03	0		2300
2016-04-29 23:22:00	2016-05-02 00:26:00	90127	1015	4292016	2016-04-29	600	Scrambled Eggs, Fried Plantains, Pancake, Soft Tacos, Watermelon		3/4 of it	Peanut Butter And Crackers; Dried Cranberries		All of it	Baked Potato With Cheese, Grilled Shrimp And Mixed Vegetables		3/4 of it	Cheese crackers	Bottled water					Coffee or tea		Fruit juice		Beer, wine, or spirits	Good									Doxy	30 mins to 1 hour	Walked	Easy	2019-05-03	1	Hard and formed (like a cigar)	2130
2016-05-01 09:41:00	2016-05-02 00:26:00	123577	1015	4302016	2016-04-30	600	Soft Cooked Egg, Toast, Salsa, Refried Beans, Watermelon, Mango And Pineapple		All of it	Chocolate		All of it	Pork Chop, Mashed Potato, Yellow Squash		All of it	Popcorn	Bottled water					Coffee or tea		Fruit juice			Good									Doxy	Less than 30 mins	Walked	Easy	2019-05-03	1	Hard and formed (like a cigar)	2130
2016-05-02 00:26:00	2016-05-02 00:26:00	53106	1015	5012016	2016-05-01	630	Oatmeal, Walnuts, Raisins, Brown Sugar, Cinnamon, Grapefruit		All of it	Popcorn		All of it	Salmon, Rice And Green Beans, Garden Salad; Ice Cream With Nut Toppings		3/4 of it	Chocolate, power bar	Bottled water					Coffee or tea					Good									Doxy	Less than 30 mins	Walked	Easy	2019-05-03	2	Hard and formed (like a cigar)	2300
2016-05-03 00:18:00	2016-05-03 00:18:00	85885	1015	5022016	2016-05-02	505	Scrambled Eggs, Bacon, Peaches, Mandarin Oranges, Watermelon, Biscuit		All of it	Powerbar, Trailmix		All of it	Sausage, Mashed Potato, Carrots		All of it	M&Ms	Bottled water					Coffee or tea	Milk				Good									Doxy, multivitamin	1 to 2 hours	Jogging, walking, zumba	Challenging	2019-05-03	0		2300
2016-05-04 06:35:00	2016-05-04 06:35:00	109052	1015	5032016	2016-05-03	505	Oatmeal, Walnuts, Raisins, Brown Sugar, Cinnamon; Cantelope		All of it	Powerbar		All of it	Popcorn		All of it	Peanut M&Ms, trailmix, fruit snacks	Bottled water					Coffee or tea	Milk				Good									Doxy	30 mins to 1 hour	Arrobics, zumba, walked	Moderate	2019-05-03	1	Hard and formed (like a cigar)	2230
2016-05-05 01:07:00	2016-05-05 01:07:00	66708	1015	5042016	2016-05-04	445	Scrambled Eggs And Bacon, Watermellon		All of it	Donut		All of it	Pork Chop, Mashed Potato, Spinach		All of it	Chocolate	Bottled water					Coffee or tea	Milk				Good									Doxy	30 mins to 1 hour	Walking	Easy	2019-05-03	0		2300
2016-05-06 00:24:00	2016-05-06 00:24:00	83828	1015	5052016	2016-05-05	505	Scrambled Egg White With Mixed Vegetables, Bacon, Onion And Cheese; Watermelon		All of it	Trailmix, Power Bar, Yogurt		All of it	Popcorn		All of it	Fruit snacks	Bottled water					Coffee or tea	Milk			Beer, wine, or spirits	Good									Doxy	Less than 30 mins	Walked	Easy	2019-05-03	0		2345
2016-05-08 00:55:00	2016-05-08 00:55:00	174609	1015	5072016	2016-05-07	505	Scrambled Eggs, Bacon, Tortilla, Watermelon		All of it	Popcorn, Trailmix		All of it	Cream Of Chicken Soup, Garden Salad, Watermelon		All of it	Fruit snacks, vanilla yogurt, chocolate	Bottled water					Coffee or tea					Good									Doxy	30 mins to 1 hour	Walked	Easy	2019-05-03	0		2245
2016-05-09 08:36:00	2016-05-09 08:36:00	114112	1015	5082016	2016-05-08	645	Scrambled Eggs, Tortilla, Watermelon		All of it	Noodles, Swedish Meatballs, Peas And Carrots		All of it	Popcorn		All of it	Chocolate	Bottled water					Coffee or tea					Good				Tiredness					Doxy and multivitamin	Less than 30 mins	Walked	Easy	2019-05-03	1	Hard and formed (like a cigar)	2230
2016-05-09 23:45:00	2016-05-09 23:45:00	54499	1015	5092016	2016-05-09	600	Oatmeal, Raisins, Coconut, Walnuts, Brown Sugar And Cinnamon; Watermelon And Papaya		All of it	Grilled Chicken Sandwich With Swiss Cheese; Watermelon		All of it	Nothing			Chocolate, mints, ice cream cone	Bottled water					Coffee or tea					Good				Tiredness					Doxy and multivitamin	Less than 30 mins	Walked	Easy	2019-05-03	0		2230
2016-05-10 23:28:00	2016-05-10 23:28:00	85396	1015	5102016	2016-05-10	630	Power Bar		All of it	Pork Chop, Mashed Potato, Corn; Watermelon		All of it	Nothing			Ice cream sandwich, chocolate, mints	Bottled water					Coffee or tea		Fruit juice			Good									Doxy	Less than 30 mins	Walked	Easy	2019-05-03	1	Hard and formed (like a cigar)	2230
2016-05-11 23:05:00	2016-05-12 23:56:00	85037	1015	5112016	2016-05-11	505	Scrambled Eggs, Tortillas; Watermelon		All of it	Ham, Lettuce And Tomato Sandwich; Fries		3/4 of it	Popcorn		All of it	Chocolate, mints	Bottled water					Coffee or tea		Fruit juice			Good									Doxy	30 mins to 1 hour	Walked; jogged	Moderate	2019-05-03	1	Hard and formed (like a cigar)	2230
2016-05-12 23:56:00	2016-05-12 23:56:00	89416	1015	5122016	2016-05-12	505	Oatmeal, Walnuts, Raisins, Brown Sugar, Cinnamon, Coconut; Watermelon And Pineapple		All of it	Granola Clusters		All of it	Fried Catfish, Mashed Potato And Mixed Vegetables		3/4 of it	Chocolate and mints	Bottled water					Coffee or tea	Milk				Good									Doxy and multivitamin	Less than 30 mins	Walked	Easy	2019-05-03	1	Hard and formed (like a cigar)	2230
2016-05-14 00:05:00	2016-05-15 01:22:00	86961	1015	5132016	2016-05-13	505	Oatmeal, Walnuts, Raisins, Cinnamon, Broen Sugar And Coconut; Grapefruit		All of it	Grilled Chicken Fajita With Tortillas; Grapefruit		All of it	Granola		All of it	Vegetable chips; chocolate, mints	Bottled water					Coffee or tea	Milk				Good									Doxy and multivitamin	30 mins to 1 hour	Jogged and walked	Moderate	2019-05-03	1	Hard and formed (like a cigar)	2330
2016-05-15 01:22:00	2016-05-15 01:22:00	91008	1015	5142016	2016-05-14	600	Scrambled Eggs, Bacon, Tortilla, Watermelon And Cantalope		All of it	Chicken, Mixed Vegetables, Rice, Fried Plantains, Avocado		3/4 of it	Nothing			Vegetable chips, chocolate	Bottled water					Coffee or tea	Milk	Fruit juice		Beer, wine, or spirits	Good									Doxy, multivitamin	30 mins to 1 hour	Jogged, walked	Moderate	2019-05-03	0		2345
2016-05-16 01:01:00	2016-05-16 01:01:00	85125	1015	5152016	2016-05-15	630	Scrambled Eggs, Pancakes, Watermelon And Pineapple		All of it	Popcorn, Yogurt		All of it	Sweet Potato Chips		All of it	Chocolate	Bottled water					Coffee or tea	Milk				Good				Tiredness					Doxy and multivitamin	Less than 30 mins	Walked	Easy	2019-05-03	2	Hard and formed (like a cigar)	2330
2016-05-17 01:10:00	2016-05-17 01:10:00	86971	1015	5162016	2016-05-16	505	Oatmeal, Walnut, RAisins, Coconut And Cinnamon; Watermelon And Pineapple		All of it	Powerbar		All of it	Stuffed Cabbage Roll, Garden Salad		All of it	Pistacios, chocolate	Bottled water					Coffee or tea	Milk				Good									Doxy, multivitamin	30 mins to 1 hour	PT - jogged, ran, pushups, walked	Challenging	2019-05-03	1	Hard and formed (like a cigar)	2300
2016-05-25 23:49:00	2016-05-25 23:49:00	229	1015	5172016	2016-05-17	430	Ham And Cheese Sandwich, Hard Boiled Egg		All of it	Power Bar		All of it	Pizza		All of it	Potato chips, cookies	Bottled water			Soda				Fruit juice			Good									Doxy	Less than 30 mins	Walked	Easy	2019-05-03	0		2245
2016-05-25 23:52:00	2016-05-25 23:52:00	158	1015	5182016	2016-05-18	430	Power Bar		All of it	MRE		1/2 of it	MRE		1/2 of it	Trailmix	Bottled water										Good									Doxy	Less than 30 mins	Walked	Easy	2019-05-03	0		2045
2016-05-25 23:55:00	2016-05-25 23:55:00	161	1015	5192016	2016-05-19	500	Power Bar		All of it	MRE		1/4 of it	MRE		1/2 of it		Bottled water					Coffee or tea					Good				Tiredness						Less than 30 mins	Walked	Easy	2019-02-01	0		2100
2016-05-25 23:58:00	2016-05-25 23:58:00	170	1015	5202016	2016-05-20	500	Power Bar		All of it	MRE		1/4 of it	Popcorn		All of it	Ice cream, chocolate	Bottled water					Coffee or tea					Good				Tiredness						Less than 30 mins	Walked	Easy	2019-05-03	1	Hard and formed (like a cigar)	2000
2016-05-26 00:01:00	2016-05-26 00:01:00	218	1015	5212016	2016-05-21	1135	Power Bar		All of it	Popcorn		All of it	Yogurt, Sweet Potato Chips		All of it	Ice cream, chocolate	Bottled water					Coffee or tea		Fruit juice			Good				Tiredness					Doxy	Less than 30 mins	Walked	Easy	2019-05-03	1	Hard and formed (like a cigar)	2230
2016-05-26 00:06:00	2016-05-26 00:06:00	262	1015	5232016	2016-05-23	505	Oatmeal, Walnuts, Raisins, Brown Sugar, Cinnamon; Grapefruit		All of it	Power Bar		All of it	Popcorn		All of it	Ice cream, mints	Bottled water					Coffee or tea	Milk	Fruit juice			Good									Doxy	1 to 2 hours	Jogged, zumba, walked	Challenging	2019-05-03	1	Hard and formed (like a cigar)	2115
2016-05-26 00:09:00	2016-05-26 00:09:00	188	1015	5242016	2016-05-24	505	Oatmeal, Walnuts, Raisins, Brown Sugar, Cinnamon; Grapefruit		All of it	Power Bar		All of it	Popcorn		All of it	Ice cream, goldfish crackers	Bottled water					Coffee or tea	Milk				Good									Doxy	30 mins to 1 hour	Zumba, walked	Moderate	2019-05-03	0		2300
2016-05-26 00:13:00	2016-05-26 00:13:00	244	1015	5252016	2016-05-25	445	Oatmeal, Walnuts, Raisins, Brown Sugar, Cinnamon; Watermelon And Pineapple		All of it	Chicken, Cooked Mixed Vegetables And Fried Plantain		All of it	Vegetable Chips		All of it	Mints, chocolate	Bottled water					Coffee or tea	Milk	Fruit juice			Good									Doxy	30 mins to 1 hour	Walked	Easy	2019-05-03	1	Hard and formed (like a cigar)	2300
2016-05-29 00:55:00	2016-05-29 00:55:00	30011	1015	5272016	2016-05-27	630	Scrambled Eggs, Sausage, Pancake W/syrup, Watermelon		All of it	Cookies		All of it	Bean Burrito, Rice, Corn And Lima Beans; Watermelon		3/4 of it	Cookies, chocolate	Bottled water					Coffee or tea	Milk	Fruit juice			Good									Doxy	30 mins to 1 hour	Walked	Easy	2019-05-03	1	Hard and formed (like a cigar)	2345
2016-05-28 16:34:00	2016-05-29 00:55:00	231694	1015	5282016	2016-05-28	615	Scrambled Eggs, Bacon, Sweet Roll, Watermelon		All of it	Triscuits		All of it	Vegetable Chips, Crackers And Humus		All of it	Chocolate	Bottled water					Coffee or tea	Milk				Good									Doxy	Less than 30 mins	Walked	Easy	2019-05-03	1	Hard and formed (like a cigar)	2300
2016-05-31 00:26:00	2016-05-31 00:26:00	171055	1015	5292016	2016-05-29	600	Power Bar		All of it	Triscuits		All of it	Nothing			Ice cream and cookies	Bottled water					Coffee or tea		Fruit juice			Good									Doxy	30 mins to 1 hour	Jogged, walked	Moderate	2019-05-03	1	Hard and formed (like a cigar)	2300
2016-05-31 00:29:00	2016-05-31 00:29:00	219	1015	5302016	2016-05-30	630	Granola		All of it	Triscuits		All of it	Pork Chop, Mashed Potato, Corn & Lima Beans; Watermelon		All of it	Candy	Bottled water					Coffee or tea		Fruit juice			Good									Doxy	Less than 30 mins	Walked	Easy	2019-05-03	1	Hard and formed (like a cigar)	2345
2016-06-01 00:29:00	2016-06-01 00:29:00	86371	1015	5312016	2016-05-31	505	Oatmeal, Walnuts, Brown Sugar, Cinnamon, Raisins, Coconut; Watermelon And Cantelope		All of it	Power Bar		All of it	Nothing			Chocolate, ice cream	Bottled water					Coffee or tea	Milk				Good									Doxy	Less than 30 mins	Walked	Easy	2019-05-03	0		2230
2016-06-02 00:11:00	2016-06-02 00:11:00	85342	1015	6012016	2016-06-01	445	Scrambled Eggs, Bacon, Watermelon And Cantelope		All of it	Triscuit Crackers		All of it	Ice Cream, Popcorn		All of it	Mints	Bottled water					Coffee or tea	Milk	Fruit juice			Good				Tiredness					Doxy	Less than 30 mins	Walked	Easy	2019-05-03	0		2245
2016-06-03 00:14:00	2016-06-03 00:14:00	86298	1015	6022016	2016-06-02	505	Scrambled Eggs, Turkey Sausage, Grapefruit		All of it	Italian Soup, Garden Salad With Fat Free Honey Mustard, Wheat Bread, Watermelon		All of it	Popcorn		All of it	Chocolate, mints	Bottled water					Coffee or tea	Milk				Good									Doxy	Less than 30 mins	Walked	Easy	2019-05-03	0		2245
2016-06-07 00:41:00	2016-06-07 00:41:00	347204	1015	6052016	2016-06-05	630	Granola, Cherry Yogurt		All of it	Popcorn		All of it	Triscuit Crackers		All of it	Icecream	Bottled water					Coffee or tea		Fruit juice			Good									Doxy	Less than 30 mins	Walked	Easy	2019-05-03	1	Hard and formed (like a cigar)	2345
2016-06-07 00:45:00	2016-06-07 00:45:00	259	1015	6062016	2016-06-06	505	Raisin Bran, Watermelon And Cantalope		All of it	Power Bar		All of it	Garden Salad, Chicken Pot Pie And Rice		3/4 of it	Ice cream, chocolate	Bottled water					Coffee or tea	Milk				Good									Doxy	1 to 2 hours	Jogged, zumba, walked	Challenging	2019-05-03	1	Hard and formed (like a cigar)	2230
2016-06-08 00:38:00	2016-06-08 00:38:00	86001	1015	6072016	2016-06-07	505	Oatmeal, Pecans, Cinnamon, Coconut, Raisins; Watermelon		All of it	Vegetable Chips		All of it	Scrambled Eggs		All of it	Ice cream, candy, crackers	Bottled water					Coffee or tea	Milk				Good									Doxy	30 mins to 1 hour	Cross fit, walked	Challenging	2019-05-03	1	Hard and formed (like a cigar)	2300
2016-06-09 00:19:00	2016-06-09 00:19:00	85223	1015	6082016	2016-06-08	505	Scrambled Eggs, Sausage, Tortilla; Watermelon And Pineapple		All of it	Power Bar		All of it	Vegetable Chips, Sherbet		All of it	Chocolate covered cranberries	Bottled water					Coffee or tea	Milk				Good									Doxy	Less than 30 mins	Walked	Easy	2019-05-03	1	Hard and formed (like a cigar)	2245
2016-06-10 00:15:00	2016-06-10 00:15:00	86156	1015	6092016	2016-06-09	500	Scrambled Eggs, Bacon, Wheat Toast; Watermelon		All of it	Power Bar		All of it	Pork Chop, Mashed Potatos, Spinach; Watermelon		All of it	Vegetable chips, chocolate	Bottled water					Coffee or tea	Milk				Good								Cramp	Doxy	30 mins to 1 hour	Walked	Easy	2019-05-03	1	Hard and formed (like a cigar)	2245
2016-06-12 09:58:00	2016-06-12 09:58:00	207781	1015	61021016	2016-06-10	505	Yogurt, Banana		All of it	Chicken Kabob, Pupusa With Toppings/salsa, Potato Salad, Coleslaw		All of it	Popcorn		All of it	Chocolate covered cranberries	Bottled water					Coffee or tea					Good									Doxy	30 mins to 1 hour	Jogged	Moderate	2019-05-03	1	Hard and formed (like a cigar)	2230
2016-06-12 10:03:00	2016-06-12 10:03:00	298	1015	6112016	2016-06-11	600	Oatmeal With Pecans, Raisins, Brown Sugar, Coconut; Watermelon		All of it	Popcorn		All of it	Beef Rib, Pork, Baked Beans, Pasta Salad, Chips And Salsa, Tres Leches Cake		All of it	Cookies	Bottled water					Coffee or tea	Milk				Good		Gastrointestinal issues						Cramp	Doxy	Less than 30 mins	Walked	Easy	2019-05-03	2	Hard and formed (like a cigar)	2330
2016-06-13	2016-06-14 08:45:00	50220	1015	6122016	2016-06-12	600	Egg White Omelet With Tomato, Ham, Onions And Cheese, Jalepeno Peppers; Watermelon And. Cantelope.		All of it	Triscuits, Pistachio Nuts		All of it	Nothing			Cookies, chocolate covered cranberries	Bottled water					Coffee or tea	Milk				Good		Gastrointestinal issues						Cramp	Doxy	Less than 30 mins	Walked	Easy	2019-05-03	2	Hard and formed (like a cigar)	2330
2016-06-14 08:49:00	2016-06-14 08:49:00	242	1015	6132016	2016-06-13	505	Oatmeal, Pecans, RAisins, Brown Sugar, Coconut; Watermelon And Pineapple		All of it	Yogurt, Power bar		All of it	Hamburger, Potato Salad, Vegetable Salad, Cake		All of it	Mints, chocolate	Bottled water					Coffee or tea	Milk				Good		Gastrointestinal issues		Tiredness				Cramp	Doxy	30 mins to 1 hour	Jogged	Moderate	2019-05-03	2	Hard and formed (like a cigar)	2300
2016-06-15 00:10:00	2016-06-15 00:10:00	55263	1015	6142016	2016-06-14	530	Oatmeal, Pecans, Raisins, Brown Sugar, Coconut; Grapefruit		All of it	Cheese Sticks, Triscuit Crackers		All of it	Vegetable Chips		All of it	Chocolate covered cherries, mints	Bottled water					Coffee or tea	Milk	Fruit juice			Good		Gastrointestinal issues						Cramp	Doxy	Less than 30 mins	Walked	Easy	2019-05-03	1	Hard and formed (like a cigar)	2300
2016-06-16 00:23:00	2016-06-16 00:23:00	87157	1015	6152016	2016-06-15	505	Oatmeal, Cranberries, Pecans, Coconut, Brown Sugar, Cinnamon; WAtermelon And Pineapple		All of it	Crackers		All of it	Vegetable Chips		All of it	Mints and chocolate	Bottled water					Coffee or tea	Milk				Good				Tiredness					Doxy	Less than 30 mins	Walked	Easy	2019-05-03	0		2300
2016-06-19 00:21:00	2016-06-19 00:21:00	259079	1015	6172016	2016-06-17	530	Scrambled Eggs, Bacon, Toast; Watermelon		All of it	Snacks - Hordourves		All of it	Fish, Mashed Potato, Garden Salad With Avocado		All of it	Chocolate	Bottled water					Coffee or tea	Milk	Fruit juice			Good									Doxy	30 mins to 1 hour	Walked	Easy	2019-05-03	0		2245
2016-06-19 00:25:00	2016-06-19 00:25:00	255	1015	6182016	2016-06-18	515	Power Bar		All of it	Hot Dog And Bun With Ketchup Only		All of it	Baked Chicken, Mashed Potato And Mixed Vegetables; Watermelon; Ice Cream With Nuts And Chocolate		All of it	Chocolate, peanut butter	Bottled water					Coffee or tea					Good									Doxy	30 mins to 1 hour	Walked	Easy	2019-05-03	0		2300
2016-06-22 00:02:00	2016-06-22 00:02:00	257806	1015	6192016	2016-06-19	505	Scrambled Eggs, Bacon, Wheat Toast; Watermelon		All of it	Pork, Mashed Potato, Mixed Vegetables; Watermelon		All of it	Fish, Rice, Garden Salad		All of it	Chocolate covered cherries, cheddar crackers	Bottled water					Coffee or tea	Milk				Good									Doxy	30 mins to 1 hour	Walked	Easy	2019-05-03	0		2245
2016-06-22 00:06:00	2016-06-22 00:06:00	261	1015	6202016	2016-06-20	1145	No Breakfast, Worked 24 Hr Shift			Power Bar		All of it	Vegetable Chips, Cheese Stick		All of it	Chocolate	Bottled water					Coffee or tea		Fruit juice			Good				Tiredness					Doxy	Less than 30 mins	Walked	Easy	2019-05-03	0		630
2016-06-22 00:10:00	2016-06-22 00:10:00	226	1015	6212016	2016-06-21	505	Scrambled Eggs, Bacon, Toast, Grapefruit		All of it	Cheese Stick, Triscuits		All of it	Sweet Potato Chips		All of it	Mints	Bottled water					Coffee or tea	Milk	Fruit juice			Good				Tiredness					Doxy	Less than 30 mins	Walked	Easy	2019-05-03	1	Hard and formed (like a cigar)	2230
2016-06-23 00:13:00	2016-06-23 00:13:00	86584	1015	6222016	2016-06-22	505	Oatmeal With Brown Sugar And Walnuts		All of it	Mango And Triscuit Crackers, Peanut Butter		All of it	Cottage Cheese, Crackers		All of it	Chocolate	Bottled water					Coffee or tea		Fruit juice			Ill			Headache	Tiredness					Doxy, cold medicine	30 mins to 1 hour	Jogged, walked	Moderate	2019-05-03	0		2300
2016-06-24 09:22:00	2016-06-24 09:22:00	119310	1015	6232016	2016-06-23	505	Scrambled Eggs, Wheat Toast, Watermelon		All of it	Power Bar		All of it	Healthy Choice Pasta And Beef, Marnara Sauce And Spinach		All of it	Chocolate	Bottled water					Coffee or tea	Milk	Fruit juice			Good				Tiredness					Doxy	30 mins to 1 hour	Walked	Easy	2019-05-03	1	Hard and formed (like a cigar)	2330
2016-06-25	2016-06-27 00:30:00	52675	1015	6242016	2016-06-24	515	Oatmeal, Coconut, Brown Sugar, Cinnamon; Watermelon		All of it	Power Bar		All of it	Peanut Butter		All of it	Chocolate covered cherries, crackers	Bottled water					Coffee or tea	Milk				Good			Headache	Tiredness					Doxy	30 mins to 1 hour	Jogged, walked	Moderate	2019-05-03	1	Hard and formed (like a cigar)	2300
2016-06-27 00:36:00	2016-06-27 00:36:00	311	1015	6262016	2016-06-26	630	Granola, Boiled Eggs		All of it	Peanut Butter And Crackers		All of it	Avocado, Peanuts		All of it	Chocolate	Bottled water					Coffee or tea					Good		Gastrointestinal issues							Doxy	Less than 30 mins	Walked	Easy	2019-05-03	1	Hard and formed (like a cigar)	2330
2016-06-28 00:41:00	2016-06-28 00:41:00	86707	1015	6272016	2016-06-27	505	Oatmeal, Cranberries, Honey, Coconut, Cinnamon; Watermelon		All of it	Garden Salad And Watermelon		All of it	Avocado		All of it	Chocolate, mints	Bottled water					Coffee or tea	Milk				Good									Doxy	30 mins to 1 hour	Jogged	Moderate	2019-05-03	1	Hard and formed (like a cigar)	2300
2016-07-01 08:17:00	2016-07-01 08:17:00	286585	1015	6302016	2016-06-30	505	Granola		All of it	Crackers, Cottage Cheese		All of it	Ice Cream Bar, Crackers		All of it	Chocolate	Bottled water					Coffee or tea														Doxy	1 to 2 hours	Walked, jogged	Moderate	2019-05-03	1	Hard and formed (like a cigar)	2300
2016-07-06 07:37:00	2016-07-06 07:37:00	429558	1015	7012016	2016-07-01	545	Scrambled Eggs, Watermelon, Toast		All of it	Plantain Chips		All of it	Beef Fajita With Rice And Beans		3/4 of it	None	Bottled water					Coffee or tea	Milk			Beer, wine, or spirits	Good									Doxy	30 mins to 1 hour	Walked	Easy	2019-05-03	1	Hard and formed (like a cigar)	2300
2016-07-06 09:46:00	2016-07-06 09:46:00	7749	1015	7022016	2016-07-02	600	Egg Over Easy, Rice And Beans, Pineapple And Papaya		All of it	Nothing			Frapuccino And Pizza		All of it	Nothing	Bottled water					Coffee or tea				Beer, wine, or spirits	Good									Doxy	30 mins to 1 hour	Walked	Easy	2019-05-03	0		2230
2016-07-06 09:52:00	2016-07-06 09:52:00	398	1015	7032016	2016-07-03	600	Egg Over Easy		All of it	Tamale, Beef With Potato Stew, Rice And Avocado, Tortillas, Sweet Traditional Dessert - Cornbread Cake With Syrup Sauce		3/4 of it	Tomato Soup With Empanadas		All of it	None	Bottled water					Coffee or tea		Fruit juice		Beer, wine, or spirits	Good									Doxy	30 mins to 1 hour	Walked, horseback ride	Moderate	2019-05-03	0		2230
2016-07-06 09:55:00	2016-07-06 09:55:00	170	1015	7042016	2016-07-04	530	Omelet And Fried Plantains		All of it	Nothing			Garden Salad And Tortilla Soup		All of it	Nothing	Bottled water					Coffee or tea					Good				Tiredness	Runny or blocked nose				Doxy	30 mins to 1 hour	Walked	Easy	2019-05-03	1	Hard and formed (like a cigar)	2230
2016-07-06 09:58:00	2016-07-06 09:58:00	183	1015	7052016	2016-07-05	505	Oatmeal With Raisins, Coconut, Brown Sugar And Cinnamon; Grapefruit And Kiwi		All of it	Power Bar		All of it	Healthy choice Frozen Dinner		All of it	Mints and chocolate	Bottled water					Coffee or tea	Milk				Good				Tiredness	Runny or blocked nose				Doxy	30 mins to 1 hour	Walked	Easy	2019-05-03	1	Hard and formed (like a cigar)	2245
2016-07-07 09:15:00	2016-07-07 09:15:00	83814	1015	7062016	2016-07-06	505	Honey Granola		All of it	Honey Roasted Peanuts		All of it	Chocolate Covered Dried Cherries		All of it	Mints	Bottled water					Coffee or tea					Good									Doxy and multivitamin	1 to 2 hours	Jogged	Moderate	2019-05-03	1	Hard and formed (like a cigar)	2245
2016-07-08 07:40:00	2016-07-08 07:40:00	80698	1015	7072016	2016-07-07	550	Granola		All of it	Pork, Pineapple, Mixed Vegetables And Watermelon		3/4 of it	Peanuts, Crackers		All of it	Chocolate	Bottled water					Coffee or tea	Milk				Good									Doxy and multivitamin	Less than 30 mins	Walked	Easy	2019-05-03	0		2300
2016-07-09 00:15:00	2016-07-09 00:15:00	59672	1015	7082016	2016-07-08	505	Granola		All of it	Nothing			Ice Cream		All of it	Mints and chocolate covered cherries	Bottled water					Coffee or tea					Good				Tiredness					Doxy	30 mins to 1 hour	Jogged	Moderate	2019-05-03	1	Hard and formed (like a cigar)	2300
2016-07-12 00:32:00	2016-07-12 00:32:00	260210	1015	7102016	2016-07-10	630	Granola		All of it	Crackers		All of it	Peanut Butter And Crackers		All of it	Chocolate	Bottled water					Coffee or tea					Good									Doxy	Less than 30 mins	Walked	Easy	2019-05-03	1	Hard and formed (like a cigar)	2230
2016-07-12 00:36:00	2016-07-12 00:36:00	231	1015	7112016	2016-07-11	505	Scrambled Eggs, Bacon, Tortilla; Peaches		All of it	Power Bar		All of it	Pork Chop, Rice, Salad		All of it	Mints, chocolate, licorice	Bottled water					Coffee or tea	Milk				Good									Doxy							NA
2016-07-13 01:06:00	2016-07-13 01:06:00	88248	1015	7122016	2016-07-12	505	Oatmeal		All of it	Spinach Lasagna And Salad		All of it	Crackers And Peanut Butter		All of it	Chocolate, licorice	Bottled water					Coffee or tea					Good									Doxy	30 mins to 1 hour	Pushups, situps, jogged, walked	Moderate	2019-05-03	0		2230
2016-07-17 01:12:00	2016-07-17 01:12:00	345961	1015	7162016	2016-07-16	615	Omelet And Tortillas; Watermelon		All of it	Crackers		All of it	Salmon, Brown Rice, Cooked Carrots		3/4 of it	Chocolate, licorice	Bottled water					Coffee or tea	Milk				Good									Doxy, multivitamin	30 mins to 1 hour	Jogged, walked	Moderate	2019-05-03	1	Hard and formed (like a cigar)	2300
2016-07-17 23:40:00	2016-07-19 00:44:00	80858	1015	7172016	2016-07-17	630	Omelet, Tortilla And Grapefruit		All of it	Crackers		All of it	Healthy Choice Frozen Dinner		All of it	Chocolate	Bottled water					Coffee or tea	Milk				Good									Doxy and vitamin	Less than 30 mins	Walked	Easy	2019-05-03	0		2330
2016-07-20 00:08:00	2016-07-20 00:08:00	84268	1015	7192016	2016-07-19	505	Oatmeal, Blueberry Yogurt		All of it	Peanut Butter, Chips With Salsa		All of it	Chicken, Squash And Mashed Potatos		All of it	Chocolate	Bottled water					Coffee or tea					Good									Doxy	30 mins to 1 hour	Walked	Easy	2019-05-03	0		2230
2016-07-20 23:36:00	2016-07-22 00:08:00	84439	1015	7202016	2016-07-20	500	Watermelon, Pancakes With Syrup		All of it	Pizza		1/2 of it	Tomato Soup, Salad		1/2 of it	Chocolate, icecream	Bottled water					Coffee or tea	Milk				Good				Tiredness					Doxy	30 mins to 1 hour	Walked	Easy	2019-05-03	0		2245
2016-07-22 00:08:00	2016-07-22 00:08:00	88334	1015	7212016	2016-07-21	505	Pancakes With Syrup And Watermelon		All of it	Chips And Salsa		All of it	Shrimp Jumbalya, Brown Rice, Cooked Carrots; Watermelon		All of it	Peanut butter and crackers	Bottled water					Coffee or tea	Milk				Good									Doxy	30 mins to 1 hour	Walked	Easy	2019-05-03	0		2230
2016-07-22 23:20:00	2016-07-22 23:20:00	83517	1015	7212016	2016-07-22	505	Yogurt, Banana		All of it	Chicken Cordon Blue, mashed Potato, Green Beans, Watermelon		1/2 of it	The Other Half Of Lunch (leftovers Except No Watermelon)		All of it	Chocolate and mints	Bottled water					Coffee or tea					Good									Doxy	30 mins to 1 hour	Jogged, walked	Moderate	2019-05-03	0		2245
2016-07-24 23:41:00	2016-10-12 14:46:00	174059	1015	7232016	2016-07-23	630	Yogurt, Granola		All of it	Triscuits		All of it	Peanut Butter With Crackers		All of it	Chocolate	Bottled water					Coffee or tea					Good		Gastrointestinal issues							Doxy	Less than 30 mins	Walked	Easy	2019-05-03	1	Hard and formed (like a cigar)	2300
2016-07-24 23:46:00	2016-10-12 14:46:00	286	1015	7242016	2016-07-24	645	Omelet And Grapefruit		3/4 of it	Nothing			Salad And Grilled White Chicken , Watermelon		All of it	Chocolate	Bottled water					Coffee or tea	Milk				Good		Gastrointestinal issues							Doxy	Less than 30 mins	Walked	Easy	2019-05-03	1	Hard and formed (like a cigar)	2300
2016-07-27 00:28:00	2016-10-12 14:46:00	175325	1015	7252016	2016-07-25	505	Granola, Blueberry Yogurt, Mandarin Oranges		All of it	Cashews, Crackers, String Cheese		All of it	Tortilla Chips And Salsa		All of it	Chocolate and mints	Bottled water					Coffee or tea					Ill		Gastrointestinal issues						Cramp	Doxy	30 mins to 1 hour	Jogged, walked	Moderate	2019-05-03	1	Hard and formed (like a cigar)	2245
2016-07-27 00:30:00	2016-10-12 14:46:00	148	1015	7262016	2016-07-26	505	Omelet, Bacon And Tortillas		All of it	Banana, Tortilla Chips		All of it	Crackers		All of it	Chocolate and mints	Bottled water					Coffee or tea					Good		Gastrointestinal issues						Cramp	Doxy	Less than 30 mins	Walked	Easy	2019-05-03	0		2300
2016-08-01 00:33:00	2016-10-12 14:46:00	432161	1015	7272016	2016-07-27	500	Ham And Cheese Sandwich, Yogurt		All of it	Cookies		All of it	Grilled Pork Chop, Rice, Plantains		All of it	None	Bottled water										Good									Doxy	Less than 30 mins	Walked	Easy	2019-05-03	0		2230
2016-08-01 00:35:00	2016-10-12 14:46:00	125	1015	7282016	2016-07-28	600	Mre		1/4 of it	mre		1/4 of it	Mre		1/4 of it	Chocolate	Bottled water					Coffee or tea					Good									Doxy	30 mins to 1 hour	Walked	Easy	2019-05-03	0		2200
2016-08-01 00:37:00	2016-10-12 14:46:00	128	1015	7292016	2016-07-29	600	Mre		1/4 of it	Mre		1/4 of it	Mre		1/4 of it	Reeses pieces	Bottled water					Coffee or tea					Good									Doxy	30 mins to 1 hour	Walked	Easy	2019-05-03	0		2130
2016-08-01 00:41:00	2016-10-12 14:46:00	201	1015	7302016	2016-07-30	600	Nothing			Trailmix		All of it	Triscuits, Beef Jerky		All of it	Chocolate	Bottled water					Coffee or tea					Good									Doxy	30 mins to 1 hour	Walked	Easy	2019-05-03	1	Hard and formed (like a cigar)	2200
2016-08-01 00:44:00	2016-10-12 14:46:00	231	1015	7312016	2016-07-31	630	Pancakes, Syrup, Watermelon, Raisin Bran		All of it	Nothing			Rice With Shrimp And Sausage, Garden Salad With Ranch Dressing, Watermelon		All of it	Chocolate	Bottled water					Coffee or tea	Milk				Good									Doxy	30 mins to 1 hour	Walked	Easy	2019-05-03	1	Hard and formed (like a cigar)	2300
2016-08-02 00:39:00	2016-10-12 14:46:00	86045	1015	8012016	2016-08-01	505	Scrambled Eggs, Tortillas; Watermelon And Papaya		All of it	Tortilla Chips And Salsa		All of it	Vegetable Chips		All of it	Chocolate, mints, yogurt	Bottled water					Coffee or tea	Milk				Good									Doxy and Multivitamin	Less than 30 mins	Walked	Easy	2019-05-03	0		2300
2016-08-03 00:20:00	2016-10-12 14:46:00	177	1015	8022016	2016-08-02	500	Yogurt, Watermelon, Cinnamon Roll		All of it	Hard Boiled Eggs, Tortilla Chips And Salsa		All of it	Tortilla Chips And Salsa		All of it	Chocolate	Bottled water					Coffee or tea					Good									Doxy	Less than 30 mins	Walked	Easy	2019-05-03	1	Hard and formed (like a cigar)	2300
2016-08-04 00:07:00	2016-10-12 14:46:00	85617	1015	8032016	2016-08-03	450	Tortilla, Coffee Roll, Yogurt		All of it	Rice And Curry Chicken With Cooked Vegetables		All of it	Salmon, Rice, Garden Salad, Watermelon		3/4 of it	Chocolate, mints	Bottled water										Good				Tiredness					Doxy	30 mins to 1 hour	APFT	Moderate	2019-05-03	1	Hard and formed (like a cigar)	2200
2016-08-05 07:39:00	2016-10-12 14:46:00	113536	1015	8042016	2016-08-04	505	Tortilla, Hard Boiled Egg, Muffin, Watermelon		All of it	Tortilla Chips, Yogurt		All of it	Ice Cream Cone		All of it	Chocolate	Bottled water					Coffee or tea					Good				Tiredness					Doxy	30 mins to 1 hour	Walked	Easy	2019-05-03	1	Hard and formed (like a cigar)	2230
2016-08-06 00:37:00	2016-10-12 14:46:00	61079	1015	8052016	2016-08-05	505	Omelette, Watermelon		All of it	Powerbar		All of it	Ice Cream		All of it	Goldfish crackers, chocolate	Bottled water					Coffee or tea	Milk				Good				Tiredness					Doxy	30 mins to 1 hour	Walked	Easy	2019-05-03	0		2300
2016-08-07 02:21:00	2016-10-12 14:46:00	92634	1015	8062016	2016-08-06	630	Oatmeal With Pecans, Raisins, Cinnamon, Coconut, Honey; Watermelon		All of it	Tortilla Chips And Salsa		All of it	Yogurt, Granola		All of it	Cashews, chocolate, mints	Bottled water					Coffee or tea	Milk				Good									Doxy	30 mins to 1 hour	Walked	Easy	2019-05-03	1	Hard and formed (like a cigar)	2300
2016-08-15 01:08:00	2016-10-12 14:46:00	686790	1015	8142016	2016-08-14	600	Oatmeal, Pecans, Raisins, Brown Sugar, Coconut, Cinnamon; Watermelon And Pineapple		All of it	Tomato Soup And Garden Salad; Cottage Cheese		All of it	Ice Cream Cone		All of it	Candy, fruit from Honduras	Bottled water					Coffee or tea					Good										30 mins to 1 hour	Walked	Easy	2019-05-03	1	Hard and formed (like a cigar)	2345
2016-08-15 23:13:00	2016-10-12 14:46:00	79501	1015	8152016	2016-08-15	505	Oatmeal, Pecans, Coconut, Brown Sugar And Cinnamon; Watermelon		All of it	Cashews		All of it	Icecream		All of it	Mints, crackers	Bottled water					Coffee or tea	Milk				Good				Tiredness					Doxy	30 mins to 1 hour	Walked, run	Moderate	2019-05-03	1	Hard and formed (like a cigar)	2345
2016-07-19 00:44:00	2016-07-19 00:44:00	90236	1015	7182017	2017-07-18	505	Raisin Bran, Yogurt		All of it	Power Bar		All of it	Chips And Salsa, Ice Cream Sandwich		All of it	Mints, choc covered cherries	Bottled water					Coffee or tea	Milk		Yogurt		Good									Doxy	1 to 2 hours	Jogged, walked	Moderate	2019-05-03	0		2245
2016-03-17 23:31:00	2016-03-27 23:53:00	324	1015	3172016	2016-03-17	505	Omelette, Watermelon And Mango		All of it	Salmon, Spinach And Rice. Watermelon And Mango.		3/4 of it	Power bar		All of it	M&Ms	Bottled water					Coffee or tea					Good									Doxycycline	Less than 30 mins	Walked	Easy	2019-05-03	1	Hard and formed (like a cigar)	2230
1970-01-05 00:33:00	2016-11-04 15:42:00	399	1001b	9302016	2016-09-30	530	Mothing			Fried Shrimp And Salad		All of it	Corned Beef, Mashed Potatoes, Peas And Peach Pie		All of it	None	Bottled water										Good									Aspirin		None today	Easy	2019-05-03	1	Soft and formed (like peanut butter)	2130
1970-01-07 03:31:00	2016-11-04 15:41:00	183524	1001b	10012016	2016-10-01	530	Ham And Cheese Omlette		All of it	Nothing		All of it	Nothing		All of it	Nothing	Bottled water					Coffee or tea					Good							Muscle strain		Ibuprofen	Less than 30 mins	Nothing	Easy	2019-05-03	1	Soft and formed (like peanut butter)	2130
1970-01-07 03:37:00	2016-11-04 15:41:00	248	1001b	10022016	2016-10-02	530	Nothing		All of it	Nothing		All of it	Baked Chicken, Mashed Potatoes, Boiled Spinach, Cherry Pie		All of it	Peanuts	Bottled water					Coffee or tea					Good							Muscle strain		Ibuprofen	Less than 30 mins	None	Easy	2019-05-03	1	Soft and formed (like peanut butter)	2200
1970-02-08 03:18:00	2016-11-04 15:41:00	185736	1001b	100416	2016-10-03	500	Ham And Cheese Omlette And Watermelon		All of it	Froed Shrimp, Rice And Guacamole		All of it	Nothing		All of it	None	Bottled water					Coffee or tea					Good										1 to 2 hours		Moderate	2019-09-06	2	Hard and formed (like a cigar)	2130
1970-01-11 03:26:00	2016-11-04 15:42:00	344950	1001b	10416	2016-10-04	445	Cheese Omlette. Bacon, And Watermelon		All of it	Nothing		All of it	Hamburger Meat With Corn Bread, Green Beans An Onios And Watermelon		All of it	Peanuts	Bottled water										Good							Muscle strain		Ibuprofen	Less than 30 mins	None today due to operations	Easy	2019-09-06	2	Soft and formed (like peanut butter)	2130
1970-01-11 03:34:00	2016-11-04 15:41:00	225	1001b	10616	2016-10-05	500	Cheese Omlette		All of it	Nothing		All of it	Corned Beef, Mashed Potatoes And Peas, And Of Course Watermelon		All of it	Peanuts	Bottled water					Coffee or tea					Good							Muscle strain		Ibuprofen	Less than 30 mins		Easy	2019-09-06	1	Soft and formed (like peanut butter)	2200
1970-01-11 03:31:00	2016-11-04 15:42:00	259	1001b	10616	2016-10-06	500	Cheese Omlette, Watermelon		All of it	Nothing		All of it	Pork Stir Fry With Stir Fry Veggies		All of it	Peanuts	Bottled water					Coffee or tea					Good							Muscle strain		Aspirin	Less than 30 mins	None	Easy	2019-09-06	1	Soft and formed (like peanut butter)	2200
1970-01-12 19:14:00	2016-11-04 15:41:00	142759	1001b	10716	2016-10-07	445	Omlette And Watermellon		All of it	Nothing		All of it	Chicken Fajitas, Watermelon And Blueberry Pie		All of it		Bottled water										Good			Headache				Muscle strain		Aspirin	Less than 30 mins	None	Easy	2019-09-06	1	Hard and formed (like a cigar)	2130
1970-01-12 23:52:00	2016-11-04 15:41:00	16686	1001b	10816	2016-10-08	430	Ham And Cheese Omlette And Watermelon		All of it	Nothing		All of it	Chicken Tetrazini And Mixed Veggies		All of it	Peanuts	Bottled water										Good							Muscle strain		Aspirin	Less than 30 mins		Easy	2019-09-06	1	Soft and formed (like peanut butter)	2130
1970-01-13 23:25:00	2016-11-04 15:42:00	84768	1001b	10916	2016-10-09	600	Ham And Cheese Omlette And Watermelon		All of it	Nothing		All of it	Beef Naco Caserole And Lima Beans And Salad		All of it	Peanuts	Bottled water									Beer, wine, or spirits	Good							Muscle strain		Ibuprofen	Less than 30 mins		Easy	2019-09-06	1	Soft and formed (like peanut butter)	2130
1970-01-15 01:58:00	2016-11-04 15:42:00	95580	1001b	101016	2016-10-10	445	Nothing, Fasted All Day			Nothing			Nothing			None	Bottled water					Coffee or tea					Good							Muscle strain		Ibuprofin	1 to 2 hours		Moderate	2019-09-06	1	Hard and formed (like a cigar)	2030
1970-01-16 02:16:00	2016-11-04 15:42:00	87513	1001b	101116	2016-10-11	445	Hamand Cheese Omlette And Watermelon		All of it	Nothing		All of it	Salad And Pork Chops		All of it	None	Bottled water									Beer, wine, or spirits	Good							Muscle strain		None today	Less than 30 mins		Easy	2019-09-06	0		2100
1970-01-17 02:03:00	2016-11-04 15:42:00	85573	1001b	101216	2016-10-12	530	Ham And Cheese Omlette And Wateelon		All of it	Beef And Noodles And Salad		All of it	Veal Steak And Summer Squash		All of it	None	Bottled water										Good										Less than 30 mins		Easy		1	Hard and formed (like a cigar)	2100
1970-01-19 03:54:00	2016-11-04 15:41:00	179471	1001b	101416	2016-10-14	500	Ham And Cheese Omlette		All of it	Sauteed Cabbage And Fried Shrimp		All of it	Corned Beef And Mashed Potatoes And Boiled Spinach		All of it	Two girl scout cookies	Bottled water									Beer, wine, or spirits	Good									None	Less than 30 mins		Easy	2019-09-06	1	Soft and formed (like peanut butter)	2200
1970-01-20 03:06:00	2016-11-04 15:41:00	83533	1001b	101516	2016-10-15	600	Nothing		All of it	Pizza Two Slices		All of it	Pork Chops With Rice And Peas		All of it	Peanuts	Bottled water					Coffee or tea					Good									None	Less than 30 mins		Easy	2019-09-06	1	Soft and formed (like peanut butter)	2130
1970-01-21 00:19:00	2016-11-04 15:41:00	76355	1001b	101616	2016-10-16	445	Ham And Cheese Omlette		All of it	Chicken And Rice		All of it	Fajita Beef Strips, Rice And Salad		All of it	Peanuts	Bottled water										Good										30 mins to 1 hour		Challenging	2019-09-06	2	Soft and formed (like peanut butter)	2130
1970-01-22 00:03:00	2016-11-04 15:41:00	85455	1001b	101716	2016-10-17	430	Nothing, I Fast On Mondays		All of it	Nothing		All of it	Nothing		All of it		Bottled water					Coffee or tea					Good										Less than 30 mins		Easy	2019-09-06	0		2100
1970-01-24 00:50:00	2016-11-04 15:42:00	175615	1001b	101816	2016-10-18	500	Ham And Cheese Omlette And Watermelon		All of it	Nothing		All of it	Sliced Turkey And Mashed Potatoes And Green Beans		All of it	None	Bottled water					Coffee or tea					Good									None	Less than 30 mins		Easy	2019-09-06	1	Soft and formed (like peanut butter)	2100
1970-01-24 00:57:00	2016-11-04 15:42:00	463	1001b	101916	2016-10-19	500	Ham And Cheese Omlette		All of it	Chicken Fajita And Rice		All of it	Pork And Rice And Spinach		All of it	Peanuts	Bottled water					Coffee or tea					Good									None	Less than 30 mins		Easy	2019-09-06	1	Soft and formed (like peanut butter)	2100
1970-01-25 04:09:00	2016-11-04 15:41:00	97883	1001b	102016	2016-10-20	500	Ham And Cheese Pmlette And Watermelon		All of it	Beef Stew With Rice And Mixed Veggies And Gaucamole		All of it	Chicken Enchiladas		All of it	Peanuts	Bottled water					Coffee or tea					Good									None	Less than 30 mins		Easy	2019-09-06	2	Soft and formed (like peanut butter)	2200
1970-01-26 01:43:00	2016-11-04 15:42:00	77654	1001b	102116	2016-10-21	530	Pancakes		All of it	Spinach Lasgna		All of it	Chicken And Brocoli Rice		All of it	Peanuts	Bottled water					Coffee or tea				Beer, wine, or spirits	Good									None	Less than 30 mins	None	Easy	2019-09-06	1	Soft and formed (like peanut butter)	2100
1970-01-27 01:55:00	2016-11-04 15:41:00	87140	1001b	102216	2016-10-22	530	Nothing		All of it	Chicken, Rice, Beans, And Tortillas		All of it	Nothing		All of it	Peanuts	Bottled water									Beer, wine, or spirits	Good									None	2+ hours	Hiking		2019-05-03	1	Soft and formed (like peanut butter)	2100
1970-01-28 10:39:00	2016-11-04 15:42:00	117818	1001b	102316	2016-10-23	600	Ham And Cheese Omlette And Watermelon		All of it	Salad And Baled Chicken		All of it	Pork Fajita Strip Salad With Rice And Kidney Beans		All of it	None	Bottled water					Coffee or tea				Beer, wine, or spirits	Good									None	1 to 2 hours		Challenging	2019-09-06	1	Soft and formed (like peanut butter)	2200
1970-01-28 23:46:00	2016-11-04 15:42:00	47212	1001b	102416	2016-10-24	445	Nothing		All of it	Nothing		All of it	Nothing		All of it	None	Bottled water					Coffee or tea					Good									None	1 to 2 hours	Cardio and weights		2019-09-06	1	Hard and formed (like a cigar)	2100
1970-02-01 15:44:00	2016-11-04 15:42:00	316685	1001b	102616	2016-10-26	500	Ham And Cheese Omlette		All of it	Chicken And Rice And Green Beans		All of it	Beef Burritos And Rice		All of it	Peanuts and sweedish fish canies	Bottled water					Coffee or tea				Beer, wine, or spirits	Good										30 mins to 1 hour	Cardio and weights		2019-09-06	1	Hard and formed (like a cigar)	2130
1970-02-01 15:48:00	2016-11-04 15:42:00	206	1001b	102716	2016-10-27	445	Ham And Cheese Omlette And Watermelon		All of it	Rice And Beef Strips And Guacamole		All of it	Nothing		All of it		Bottled water					Coffee or tea				Beer, wine, or spirits	Good									None	30 mins to 1 hour	Cardio and weights	Moderate	2019-09-06	1	Hard and formed (like a cigar)	2200
1970-02-04 02:56:00	2016-11-04 15:42:00	212920	1001b	102916	2016-10-29	530	Ham And Cheese Omlette And Watermelon		All of it	Nothing		All of it	Pork And Rice And Mixed Vegetables		All of it	Almonds	Bottled water					Coffee or tea				Beer, wine, or spirits	Good										2+ hours	Cardio and weights then ultimate frisbee	Challenging	2019-05-03	1	Soft and formed (like peanut butter)	2100
1970-02-04 03:00:00	2016-11-04 15:41:00	258	1001b	103016	2016-10-30	515	Ham And Cheese Omlette		All of it	Nothing		All of it	Chicken Fajitas		All of it	Almonds	Bottled water									Beer, wine, or spirits	Good									None	2+ hours	Cardio and weights	Challenging	2019-05-03	1	Soft and formed (like peanut butter)	2130
1970-02-05 01:24:00	2016-11-04 15:42:00	80580	1001b	103116	2016-10-31	500	Nothing		All of it	Nothing		All of it	Nothing		All of it	Nothing	Bottled water					Coffee or tea					Good									None	2+ hours	Cardio and weights and flag football	Very Challenging	2019-09-06	1	Soft and formed (like peanut butter)	2100
1970-02-05 23:43:00	2016-11-04 15:41:00	80353	1001b	110116	2016-11-01	520	Ham And Cheese Omlette And Watermelon		All of it	Nothing		All of it	Corned Beef, Green Beams And Salad		All of it	None	Bottled water					Coffee or tea				Beer, wine, or spirits	Good									None	30 mins to 1 hour	Cardio and weights	Moderate	2019-09-06	0		2100
2016-11-04 20:28:00	2017-01-28 23:04:00	17135	1001b	110316	2016-11-03	500	Ham And Cheese Omlette And Watermelon		All of it	Salad		All of it	Fajitas With Refried Beans And Salad		All of it	Peanuts	Bottled water					Coffee or tea					Good									None	30 mins to 1 hour	Cardio only	Easy	2019-05-03	1	Hard and formed (like a cigar)	2100
2016-11-07 08:58:00	2017-01-28 23:04:00	221422	1001b	110616	2016-11-06	630	Ham And Cheese Omlette And Watermelon		All of it	Nothing		All of it	Salad And Hamburger Meat		All of it	Peanuts	Bottled water					Coffee or tea				Beer, wine, or spirits	Good									None	2+ hours		Challenging	2019-09-06	1	Hard and formed (like a cigar)	2100
2016-11-07 22:24:00	2017-01-28 23:04:00	48320	1001b	110716	2016-11-07	530	Nothing		All of it	Nothing		All of it	Nothing		All of it	Nothing	Bottled water					Coffee or tea					Good									None	Less than 30 mins	None	Easy	2019-09-06	1	Hard and formed (like a cigar)	2130
2016-11-08 18:26:00	2017-01-28 23:04:00	72125	1001b	110816	2016-11-08	500	Ham And Cheese Omlette And Watermelon		All of it	Chicken And Rice		All of it	Nothing		All of it	None	Bottled water					Coffee or tea					Good									None	30 mins to 1 hour	Cardio	Moderate	2019-09-06	1	Hard and formed (like a cigar)	2200
2016-11-09 20:40:00	2017-01-28 23:04:00	94470	1001b	110916	2016-11-09	600	Ham And Cheese Omlette And Watermelon		All of it	Chicken Cordon Blue And Salad		All of it	Nacho And Beef Salad		All of it	Peanuts	Bottled water					Coffee or tea				Beer, wine, or spirits	Good									None	Less than 30 mins	None	Easy	2019-09-06	1	Soft and formed (like peanut butter)	2100
2016-11-10 19:00:00	2017-01-28 23:04:00	80409	1001b	111016	2016-11-10	530	Ham And Cheese Omlette And Watermelon		All of it	Nothing		All of it	Bbq Chicken, Mixed Veggies, And Watermelon		All of it	Peanuts	Bottled water					Coffee or tea					Good										30 mins to 1 hour	Football		2019-09-06	1	Hard and formed (like a cigar)	2200
2016-11-11 20:05:00	2017-01-28 23:04:00	90288	1001b	111116	2016-11-11	630	Ham And Cheese Omlette And Watermelon		All of it	Fis And Salad And Rice		All of it	Chicken Fajita		All of it	Peanuts	Bottled water					Coffee or tea					Good									None	30 mins to 1 hour	Cardio		2019-09-06	1	Soft and formed (like peanut butter)	2200
2016-11-12 23:49:00	2017-01-28 23:04:00	203	1001b	111216	2016-11-12	630	Ham And Cheese Omlette And Watermelon		All of it	Beef And Noodles And Salad		All of it	Beef And Noodles		All of it	Peanuts	Bottled water					Coffee or tea					Good									None	Less than 30 mins	None	Easy	2019-09-06	1	Soft and formed (like peanut butter)	2300
2016-11-13 19:04:00	2017-01-28 23:04:00	69300	1001b	111316	2016-11-13	700	Nothing		All of it	Nothing		All of it	Nothing		All of it	None	Bottled water					Coffee or tea				Beer, wine, or spirits	Good									None	2+ hours	Weights and cardio		2019-09-06	1	Soft and formed (like peanut butter)	2200
2016-11-14 22:36:00	2017-01-28 23:04:00	99108	1001b	111416	2016-11-14	630	Ham And Cheese Omlette And Watermelon		All of it	Nothing		All of it	Chicken Fajita And Bread Pidding		All of it	None	Bottled water										Good									None	1 to 2 hours	Cardio and weights	Moderate	2019-09-06	0		2200
2016-11-15 20:21:00	2017-01-28 23:04:00	78338	1001b	111516	2016-11-15	530	Nothing		All of it	Chicken Cordon Blue		All of it	Pork And Peas And Rice And Watermelon		All of it	None	Bottled water					Coffee or tea					Good									None	Less than 30 mins	None	Easy	2019-09-06	1	Hard and formed (like a cigar)	2200
2016-11-16 18:52:00	2017-01-28 23:04:00	81033	1001b	111616	2016-11-16	500	Nothing		All of it	Nothing		All of it	Nothing		All of it	None	Bottled water					Coffee or tea					Good									None	2+ hours	Pt test and a frisbee game	Challenging	2019-09-06	0		2200
2016-11-17 19:06:00	2017-01-28 23:04:00	87266	1001b	111716	2016-11-17	530	Ham And Cheese Omlette, Watermelon, And Oaeal		All of it	Beef Fajitas With Rice And Brocoli		All of it	Nothing		All of it	None	Bottled water					Coffee or tea					Good									None	30 mins to 1 hour	Flag football	Moderate	2019-09-06	1	Hard and formed (like a cigar)	2200
2016-11-20 23:47:00	2017-01-28 23:04:00	276072	1001b	112016	2016-11-20	700	Ham And Cheese Omlette And Watermelon		All of it	Nothing		All of it	Pork Strips With Onios And Salad And Watermelon		All of it	Nome	Bottled water					Coffee or tea					Good									Mone	1 to 2 hours	Frisbee		2019-09-06	1	Soft and formed (like peanut butter)	2245
2016-11-21 19:29:00	2017-01-28 23:04:00	70907	1001b	112116	2016-11-21	530	Nothing		All of it	Nothing		All of it	Nothing		All of it	None	Bottled water					Coffee or tea					Good									None	Less than 30 mins	Cardio		2019-09-06	1	Soft and formed (like peanut butter)	2200
2016-11-22 20:01:00	2017-01-28 23:04:00	88326	1001b	112216	2016-11-22	530	Ham And Cheese Omlette And Watermelon		All of it	Nothing		All of it	Beef Stroginoff Over Rice And Green Beans		All of it	None	Bottled water					Coffee or tea					Good									None	1 to 2 hours	Cardio and football		2019-09-06	0		2200
2016-11-23 21:49:00	2017-01-28 23:04:00	92856	1001b	112416	2016-11-24	400	Nothing		All of it	Thanksgiving Dinner, Turkey And Mashed Potatoes And Pumpkin Pie		All of it	Nothing		All of it	None	Bottled water					Coffee or tea				Beer, wine, or spirits	Good									None	Less than 30 mins	None	Easy	2019-09-06	1	Soft and formed (like peanut butter)	2200
2016-11-25 23:57:00	2017-01-28 23:04:00	180491	1001b	112516	2016-11-25	600	Ham And Cheese Omlette		All of it	Potato Caserole And Pork Chop		All of it	Chicken Fajita		All of it	Peanuts	Bottled water					Coffee or tea					Good									None	Less than 30 mins	None	Easy	2019-09-06	2	Soft and formed (like peanut butter)	2300
2016-11-28 07:43:00	2017-01-28 23:04:00	200719	1001b	112716	2016-11-27	630	Ham And Cheese Omlette And Watermelon		All of it	Nothing		All of it	Chicken Fajita		All of it	None	Bottled water					Coffee or tea					Good									None	1 to 2 hours	Ultimate football		2019-09-06	1	Hard and formed (like a cigar)	2200
2016-11-30 22:43:00	2017-01-28 23:04:00	226838	1001b	112916	2016-11-29	445	Nothing		All of it	Nothing		All of it	Nothing		All of it	None	Bottled water					Coffee or tea					Good									None	30 mins to 1 hour	Cardio	Easy	2019-09-06	1	Soft and formed (like peanut butter)	2200
2016-11-30 22:49:00	2017-01-28 23:04:00	325	1001b	113016	2016-11-30	500	Ham And Cheese Omlette And Watermelon		All of it	Beef And Noodles		All of it	Chicken Fajita And Watermelon And Salad		All of it	Prunes and dried mango	Bottled water					Coffee or tea					Good									None	30 mins to 1 hour	Flag football	Easy	2019-09-06	1	Loose and unformed (like a thick milkshake)	2200
2017-06-02 08:11:00	2017-06-02 08:11:00	43389	1001b	10617	2017-01-06	520	Nothing			Chicken Fajita		All of it	Chicken Breast Corn And Lima Beans And Carrots	2318f5b0-0a74-4ea0-b5cc-373bfab5c819.jpg	All of it	None		Base purified water				Coffee or tea					Good									None	Less than 30 mins	None	Easy	2019-05-03	1	Hard and formed (like a cigar)	2030
1970-01-11 06:47:00	2017-01-28 23:04:00	257	1001b	10717	2017-01-07	700	Ham And Cheese Omlette		All of it	Nothing		All of it	Salad And Pork Chop		All of it	Peanuts	Bottled water									Beer, wine, or spirits	Good									None	30 mins to 1 hour	Cardio and weights		2019-09-06	1	Hard and formed (like a cigar)	2200
1970-01-11 06:50:00	2017-01-28 23:04:00	193	1001b	10817	2017-01-08	630	Ham And Cheese Omlette And Watermelon		All of it	Nothing		All of it	Rpast Beef And Salad And Watermelon		All of it	Peanuts	Bottled water					Coffee or tea				Beer, wine, or spirits	Good									None	Less than 30 mins	None	Easy	2019-09-06	1	Soft and formed (like peanut butter)	2230
1970-01-11 06:53:00	2017-01-28 23:04:00	179	1001b	10917	2017-01-09	500	Nothing - Fasted All Day - Every Monday		All of it	Nothing		All of it	Nothing		All of it		Bottled water					Coffee or tea					Good									None	1 to 2 hours	Cardio and weights	Moderate	2019-09-06	1	Hard and formed (like a cigar)	2200
1970-01-11 06:57:00	2017-01-28 23:04:00	266	1001b	11017	2017-01-10	445	Ham And Cheese Omlette, Biscuit And Gravy, Watermelon		All of it	Nothing		All of it	Mixed Veggies And Roast Beef		All of it	Peanuts	Bottled water					Coffee or tea				Beer, wine, or spirits	Good									None	30 mins to 1 hour	Cardio	Easy	2019-09-06	1	Hard and formed (like a cigar)	2230
1970-01-11 07:02:00	2017-01-28 23:04:00	275	1001b	11117	2017-01-11	445	Ham And Cheese Omlette And Watermelon		All of it	Nothong		All of it	Pork Adobo And Rice And Watermelon And Peas And Mushrooms		All of it	Peanuts	Bottled water					Coffee or tea					Good									Aspirin	1 to 2 hours	Cardio and weights		2019-09-06	1	Hard and formed (like a cigar)	2300
1970-01-11 07:16:00	2017-01-28 23:04:00	864	1001b	11217	2017-01-12	530	Ham And Cheese Omlette And Watermelon		All of it	Nothing		All of it	Salad And Chicken Fingers		All of it	Peanuts	Bottled water			Soda		Coffee or tea				Beer, wine, or spirits	Good										1 to 2 hours	Cardio and weights		2019-09-06	1	Soft and formed (like peanut butter)	2200
1970-01-13 17:50:00	2017-01-28 23:04:00	210833	1001b	11317	2017-01-13	600	Ham And Cheese Omlette And Watermelon		All of it	Nothing		All of it	Beef Enchiladas And Mixed Veggies		All of it	Peanuts		Base purified water				Coffee or tea				Beer, wine, or spirits	Good									None	1 to 2 hours	Cardio and weights	Challenging	2019-09-06	1	Hard and formed (like a cigar)	2200
1970-01-13 17:55:00	2017-01-28 23:04:00	257	1001b	11417	2017-01-14	800	Nothing		All of it	Nothing		All of it	Braised Beef And Salad And Watermelon		All of it	Peanuts		Base purified water				Coffee or tea				Beer, wine, or spirits	Good									None	1 to 2 hours	Cardio. And weights		2019-09-06	1	Soft and formed (like peanut butter)	2230
1970-01-13 18:01:00	2017-01-28 23:04:00	382	1001b	11517	2017-01-15	830	Nothing		All of it	Salad And Boiled Peas And Pork Chops And Watermelon		All of it	Chicken Fajita And Watermelon		All of it	Peanuts		Base purified water				Coffee or tea				Beer, wine, or spirits	Good									None	Less than 30 mins	None	Easy	2019-09-06	1	Hard and formed (like a cigar)	2200
1970-01-13 18:04:00	2017-01-28 23:04:00	201	1001b	11517	2017-01-16	700	Nothing		All of it	Nothing		All of it	Nothing		All of it	Mone		Base purified water				Coffee or tea					Good									None	1 to 2 hours	Cardio and weights	Challenging	2019-09-06	1	Soft and formed (like peanut butter)	2300
1970-01-13 18:08:00	2017-01-28 23:04:00	243	1001b	11617	2017-01-17	445	Ham And Cheese Omlette And Watermelon		All of it	Nothing		All of it	Pork Adobo Squash And Peas And Salad		All of it	Peanuts		Base purified water				Coffee or tea				Beer, wine, or spirits	Good									None		Cardio	Easy	2019-09-06	0		2200
1970-01-15 18:18:00	2017-01-28 23:04:00	288	1001b	11817	2017-01-18	445	Ham And Cheese Omlette And Watermelon		All of it	Nothing		All of it	Chicken Fajita And Watermelon		All of it	Peanuts		Base purified water				Coffee or tea					Good									None	30 mins to 1 hour	Cardio	Easy	2019-09-06	1	Soft and formed (like peanut butter)	2300
1970-01-15 18:24:00	2017-01-28 23:04:00	340	1001b	11917	2017-01-19	445	Ham And Cheese Omlette And Watermelon		All of it	Nothing		All of it	Swedish Meatballs And Noodles And Guacamole And Watermelon		All of it	Peanuts		Base purified water				Coffee or tea					Good									None	30 mins to 1 hour	Cardio	Easy	2019-09-06	1	Loose and unformed (like a thick milkshake)	2300
1970-01-16 16:56:00	2017-01-28 23:04:00	81109	1001b	12017	2017-01-20	445	Scrambled Eggs And Watermelon		All of it	Nothing		All of it	Fried Chicken Breast And Green Beans And Watermelon		All of it	Peanuts		Base purified water				Coffee or tea			Yogurt		Good									None	1 to 2 hours	Cardio		2019-09-06	1	Soft and formed (like peanut butter)	2300
1970-01-18 16:10:00	2017-01-28 23:04:00	170070	1001b	12217	2017-01-22	630	Ham And Cheeese Omlette And Watermelon		All of it	Nothing		All of it	Broccoli And Mixed Veggies And Pork Strips		All of it	None		Base purified water				Coffee or tea				Beer, wine, or spirits	Good									None	1 to 2 hours	Cardio and weights		9+	1	Soft and formed (like peanut butter)	2230
1970-01-19 15:36:00	2017-01-28 23:04:00	84344	1001b	12317	2017-01-23	445	Nothing		All of it	Nothing		All of it	Nothing		All of it	None		Base purified water				Coffee or tea					Good									None	30 mins to 1 hour	Cardio	Moderate	2019-09-06	1	Hard and formed (like a cigar)	2230
1970-01-21 16:32:00	2017-01-28 23:04:00	176143	1001b	12517	2017-01-24	445	Ham And Cheese Omlette		All of it	Salad And Fried Chicken Breast		All of it	Nothing		All of it	Cheese crackers		Base purified water				Coffee or tea					Good									None	30 mins to 1 hour	Cardio		2019-09-06	0		2230
1970-01-21 16:37:00	2017-01-28 23:04:00	338	1001b	12517	2017-01-25	445	Ham And Cheese Omlette And Watermelon		All of it	Salad And Baked Chicken		All of it	Nothing		All of it	Cheese crackers		Base purified water				Coffee or tea					Good									None	30 mins to 1 hour	Cardio and weights		2019-09-06	2	Soft and formed (like peanut butter)	2230
2017-01-28 23:04:00	2017-01-28 23:04:00	999999999	1001b	12717	2017-01-27	445	Ham And Cheese Omlette And Watermelon		All of it	Pot Roast And Mashed Potatoe And Mixed Veggies		All of it	Peas And Mixed Veggies And Baked Chicken		All of it	None		Base purified water				Coffee or tea				Beer, wine, or spirits	Good									None	30 mins to 1 hour	Cardio	Easy	2019-09-06	1	Soft and formed (like peanut butter)	2200
2017-01-28 23:12:00	2017-01-28 23:12:00	486	1001b	12817	2017-01-28	600	Ham And Cheese Omlette And Watermelon		All of it	Mixed Veggies And Baked Chicken And Lemon Cake		All of it	Nothing		All of it	Cheese crackers		Base purified water				Coffee or tea					Good									None	Less than 30 mins	None	Easy	2019-09-06	1	Hard and formed (like a cigar)	2230
2017-01-29 22:22:00	2017-01-29 22:22:00	83388	1001b	12917	2017-01-29	445	Ham And Cheese Omlette And Watermelon		All of it	Beef Steak		All of it	Nothing		All of it	Peanuts		Base purified water				Coffee or tea				Beer, wine, or spirits	Good									None	1 to 2 hours	Cardio snd weights	Moderate	2019-09-06	1	Soft and formed (like peanut butter)	2200
2017-01-30 19:10:00	2017-01-31 22:11:00	74861	1001b	13017	2017-01-30	445	Nothing		All of it	Nothing		All of it	Nothing		All of it	None		Base purified water				Coffee or tea					Good									None	1 to 2 hours	Cardio and wgts		9+	1	Hard and formed (like a cigar)	2200
2017-01-31 22:11:00	2017-01-31 22:11:00	97276	1001b	13117	2017-01-31	445	Nothing		All of it	Nothing		All of it	Srimp Linguini And Mixed Veggies And Lemon Pie		All of it	None		Base purified water				Coffee or tea					Good									None	Less than 30 mins	None	Easy	2019-09-06	0	Hard and formed (like a cigar)	2130
2017-02-01 22:49:00	2017-02-01 22:49:00	88711	1001b	20117	2017-02-01	530	Nothing		All of it	Salad Mixed Veggies And Salad		All of it	Salad And Chicken Cordon Bleu		All of it	Peanuts		Base purified water				Coffee or tea					Good									None	1 to 2 hours	Cardio		2019-09-06	1	Soft and formed (like peanut butter)	2200
2017-02-02 21:45:00	2017-02-02 21:45:00	82518	1001b	20217	2017-02-02	445	Scrambled Eggs Biscuit With Gravy And Watermelon		All of it	Mixed Veggies Rice And Salsbury Steak		All of it	Nothing		All of it	Peanuts		Base purified water				Coffee or tea					Good									None	1 to 2 hours	Cardio and weights		2019-09-06	1	Soft and formed (like peanut butter)	2130
2017-02-05 19:04:00	2017-02-05 19:04:00	309	1001b	20417	2017-02-04	530	Nothing		All of it	Roast Beef And Rice And Broccoli		All of it	Nothing		All of it	None		Base purified water				Coffee or tea			Yogurt	Beer, wine, or spirits	Good									Nonw	1 to 2 hours	Sports		2019-09-06	1	Hard and formed (like a cigar)	2200
2017-02-05 19:10:00	2017-02-05 19:10:00	385	1001b	20517	2017-02-05	600	Ham And Cheese Omlette And Watermelon		All of it	Baked Chicken Rice And Cooked Spinach		All of it	Nothing		All of it	None		Base purified water				Coffee or tea				Beer, wine, or spirits	Good									None	1 to 2 hours	Sports		2019-09-06	1	Soft and formed (like peanut butter)	2230
2017-02-06 21:49:00	2017-02-06 21:49:00	95934	1001b	20617	2017-02-06	500	Nothing		All of it	Nothing		All of it	Nothing		All of it	None		Base purified water				Coffee or tea					Good									None	Less than 30 mins	None	Easy	2019-09-06	0		2100
2017-02-08 23:00:00	2017-02-08 23:00:00	201	1001b	20817	2017-02-08	530	Nothing		All of it	Roast Pork And Mixed Green And Waxed Beans		All of it	Bbq Pork And Rice And Broccoli		All of it	None		Base purified water				Coffee or tea					Good									Ibruprofin	1 to 2 hours	Sports cardio	Challenging	2019-09-06	1	Hard and formed (like a cigar)	2200
2017-02-09 22:38:00	2017-02-09 22:38:00	85030	1001b	20917	2017-02-09	445	Scrambled Eggs And Sausage And Biscuit And Gravy		All of it	Bbq Pork Boiled Veggies And Wateelon		All of it	Nothing		All of it	None		Base purified water				Coffee or tea					Good									None	1 to 2 hours	Cardio and weights		2019-09-06	1	Hard and formed (like a cigar)	2200
2017-02-26 11:22:00	2017-02-26 11:22:00	206	1001b	21717	2017-02-17	445	Ham And Cheese Omlette Biscuit W Gravy And Watermelon		All of it	Nothing		All of it	None		All of it	Peanuts		Base purified water				Coffee or tea					Good									None	30 mins to 1 hour	Cardio	Moderate	2019-09-06	1	Soft and formed (like peanut butter)	2200
2017-02-26 11:27:00	2017-02-26 11:27:00	283	1001b	21817	2017-02-18	600	Ham An Cheese Omlette Biscuit And Gravy And Watermelon		All of it	Nothing		All of it	Baked Chicken Rice And Mixed Boiled Veggies		All of it	Peanuts		Base purified water				Coffee or tea				Beer, wine, or spirits	Good									None	1 to 2 hours	Cardio and weights	Moderate	2019-09-06	1	Hard and formed (like a cigar)	2130
2017-02-26 11:32:00	2017-02-26 11:32:00	308	1001b	21917	2017-02-19	630	Ham And Cheese Omlette Biscuit And Gravy And Watermelon		All of it	Pork Chop Boiled Peas And Sauteed Squash		All of it	Nothing- Started Fast		All of it	Peanuts		Base purified water				Coffee or tea				Beer, wine, or spirits	Good									Ibuprofen	2+ hours	Cardio sports and weights		2019-09-06	1	Hard and formed (like a cigar)	2200
2017-02-26 11:35:00	2017-02-26 11:35:00	183	1001b	22017	2017-02-20	445	None - Fasted		All of it	Nothing- Fasted		All of it	Nothing - Fasted		All of it	None		Base purified water									Good									None	30 mins to 1 hour	Cardio	Moderate	9+	1	Soft and formed (like peanut butter)	2230
2017-02-26 11:49:00	2017-02-26 11:49:00	816	1001b	22117	2017-02-21	530	Nothing		All of it	Salad And Watermelon And Guacamole And Chips		All of it	Egg Salad In Tortilla And Salad		All of it	None		Base purified water				Coffee or tea					Good									None	30 mins to 1 hour	None	Easy	2019-09-06	0		2230
2017-02-26 11:54:00	2017-02-26 11:54:00	298	1001b	22217	2017-02-22	445	Ham And Cheese And Biscuit And Gravy		All of it	Nothing		All of it	Roast Beef Rice And Green Beans		All of it	Peanuts		Base purified water				Coffee or tea				Beer, wine, or spirits	Good									None	30 mins to 1 hour	Cardio and weights	Moderate	2019-09-06	1	Hard and formed (like a cigar)	2200
2017-02-26 11:59:00	2017-02-26 11:59:00	297	1001b	22317	2017-02-23	530	Ham And Cheese Omlette And Watermelon		All of it	Nothing		All of it	Chicken Fajita And Boiled Peas		All of it	Peanuts		Base purified water				Coffee or tea					Good									None	30 mins to 1 hour	Cardio and weights	Moderate	2019-09-06	1	Hard and formed (like a cigar)	2230
2017-02-26 12:07:00	2017-02-26 12:07:00	520	1001b	22317	2017-02-24	445	Ham And Cheese Omlette And Biscuit W Gravy And Watermelon		All of it	Protein Cookie		1/2 of it	Baked Chicken And Rice And Geeen Beans And Yellow Cake		All of it	Peanuts		Base purified water				Coffee or tea				Beer, wine, or spirits	Good									None	1 to 2 hours	Cardio and weights	Moderate	2019-09-06	1	Loose and unformed (like a thick milkshake)	2230
2017-02-26 12:12:00	2017-02-26 12:12:00	298	1001b	22517	2017-02-25	553	Nothing - Started Fast Today		All of it	Nothing		All of it	Norhing		All of it	None		Base purified water									Good									None	Less than 30 mins	Cardio	Easy	9+	1	Soft and formed (like peanut butter)	2130
2017-02-26 13:37:00	2017-02-26 13:37:00	5111	1001b	22617	2017-02-26	800	Nothing- Still Fasting		All of it	Nothing		All of it	Nothing		All of it	None		Base purified water									Good									None	1 to 2 hours	Sports		2019-09-06	0		2200
2017-02-27 22:43:00	2017-02-27 22:43:00	119158	1001b	22717	2017-02-27	530	Nothing- Fasting		All of it	Nothing- Fasting		All of it	Veal Chop, Squash, Salad, Watermelon		All of it	Peanuts		Base purified water									Good			Headache						None	Less than 30 mins	Cardio	Easy	2019-05-03	1	Hard and formed (like a cigar)	2200
2017-02-28 20:17:00	2017-02-28 20:17:00	77631	1001b	22817	2017-02-28	445	Ham And Cheese Pmlwtte And Watermelon		All of it	Baked Chicken, Steamed Broccoli, Steamed Carrots, Guacamole		All of it	Nothing		All of it	Peanuts and corn nuts		Base purified water								Beer, wine, or spirits	Good									None	Less than 30 mins	Cardio	Moderate	2019-09-06	1	Soft and formed (like peanut butter)	2200
2017-03-01 20:10:00	2017-03-01 20:10:00	85961	1001b	30117	2017-03-01	445	Nothing		All of it	Salad And Hard Boiled Eggs		All of it	Chicken Cordon Bleu Boiled Peas And Boiled Mixed Veggies And Watermelon		All of it	None		Base purified water				Coffee or tea					Good									None	30 mins to 1 hour	Cardio	Moderate	2019-09-06	1	Soft and formed (like peanut butter)	2200
2017-04-02 23:41:00	2017-04-02 23:41:00	159	1001b	30217	2017-04-02	630	Nothing			Parmesion Chicken With Rice, Big Salad And A Piece Of Pie		All of it	Nothing - Fasting			None		Base purified water									Good									None	2+ hours	Cardio and weights		9+	1	Loose and unformed (like a thick milkshake)	2145
2017-04-03 23:46:00	2017-04-03 23:46:00	86690	1001b	30317	2017-04-03	530	Nothing - Fasting			Nothing - Fasting			Nothing - Fasting			None - fasting		Base purified water				Coffee or tea					Good									None	Less than 30 mins	None	Easy	2019-09-06	1	Soft and formed (like peanut butter)	2200
2017-03-04 08:03:00	2017-03-04 20:38:00	126954	1001b	30317	2017-03-03	530	Ham And Cheese Omlette And Watermelon		All of it	Nothing			Chicken Fajita And Pasta Salad And Watermelon	8d653fe2-0213-4076-a502-54eaa6e5b42e.jpg	All of it	Peanuts		Base purified water				Coffee or tea					Good									None	30 mins to 1 hour	Tennis	Easy	2019-09-06	1	Soft and formed (like peanut butter)	2230
2017-03-04 20:41:00	2017-03-04 20:41:00	45506	1001b	30417	2017-03-04	600	Ham And Cheese Omlette And Watermelon	8e62e2a5-ed2b-44b2-b659-b42ab5bba77a.jpg	All of it	Roast Beef And Peas And Fried Cabbage And Watermelon		All of it	Nothing		All of it	Peanuts		Base purified water				Coffee or tea					Good									None	Less than 30 mins	None	Easy	2019-09-06	1	Soft and formed (like peanut butter)	2200
2017-03-05 14:49:00	2017-03-05 14:49:00	65248	1001b	30517	2017-03-05	630	Nothing		All of it	Giant Salad, Boiled Asparagus And Baked Chicken Thigh		All of it	Nothing - Fasting		All of it	None		Base purified water									Good									None	2+ hours	Cardio, weights and sports		2019-09-06	1	Soft and formed (like peanut butter)	2200
2017-03-06 19:44:00	2017-03-06 19:44:00	104130	1001b	30617	2017-03-06	500	Nothing - Fasted		All of it	Nothing - Fasted		All of it	Meatloaf And Salad		All of it	Peanuts		Base purified water									Good									None	30 mins to 1 hour	Cardio		2019-09-06	1	Hard and formed (like a cigar)	2200
2017-03-08 08:01:00	2017-03-09 23:19:00	130577	1001b	30817	2017-03-07	500	Ham And Cheese Omlette And Watermelon	84d18e2c-a8f4-478c-9e94-45e840a0856d.jpg	All of it	Swedish Meetballs, Brussels Sprouts, Guacamole And Chips	1e51cb3c-55e1-43ea-bfa3-7f7ac54ec63c.jpg	All of it	Nothing		All of it	Peanuts		Base purified water				Coffee or tea					Good									None	2+ hours	Cardio and weights		2019-09-06	1	Soft and formed (like peanut butter)	2200
2017-03-09 13:58:00	2017-03-09 23:19:00	107842	1001b	30817	2017-03-08	530	Ham And Cheese Omlette And Watermelon	c27d3b91-1020-4aa8-897e-ed7e4c504232.jpg	All of it	Nothing		All of it	Mothing		All of it	Cheese crackers		Base purified water				Coffee or tea					Good									None	1 to 2 hours	Cardio and weights	Moderate	2019-09-06	1	Soft and formed (like peanut butter)	2330
2017-03-09 23:22:00	2017-03-09 23:23:00	33872	1001b	30917	2017-03-09	600	Ham And Cheese Omlette And Watermelon		All of it	Chicken And Gaucamole And Olives And Chips	8c157386-815c-448a-bd88-7e058e425edc.jpg	All of it	Nothing		All of it	Peanuts and a small bag of pepperment and chocolate candy	Bottled water					Coffee or tea					Good									None	Less than 30 mins	None	Easy	2019-05-03	0		2230
2017-03-12 13:42:00	2017-03-13 22:27:00	151889	1001b	31017	2017-03-10	615	Ham And Cheese Omlette		All of it	Nothing		All of it	Egg Salad Pn Pita Bread With Broccoli Pasta Salad	29f8d179-a282-4eca-9e57-46980d8f0f5e.jpg		Peanuts		Base purified water				Coffee or tea					Good									None	Less than 30 mins	None	Easy	2019-09-06	1	Soft and formed (like peanut butter)	2330
2017-03-12 17:38:00	2017-03-12 17:38:00	13966	1001b	31117	2017-03-11	500	Nothing		All of it	Salad With Hard Boiled Eggs And Watermelon		All of it	Baked Chicken And Green Beans		All of it	None		Base purified water				Coffee or tea					Good									Mone	Less than 30 mins	None	Moderate	2019-09-06	1	Soft and formed (like peanut butter)	2100
2017-03-12 13:45:00	2017-03-13 22:27:00	163	1001b	31217	2017-03-12	800	Nothing			Hamburger Pattie Zuchini Squash Fried Rice And Salad	4e194a39-ba74-42c8-83a9-9fe921b8fc5e.jpg	All of it	Nothing - Fasting			Nothing		Base purified water									Good									None	2+ hours	Sports weights and cardio	Challenging	2019-09-06	0		2200
2017-03-13 22:30:00	2017-03-13 22:30:00	103934	1001b	31317	2017-03-13	530	Nothing- Fasting			Nothing - Fasting			Nothing- Fasting			None		Base purified water									Good									None	Less than 30 mins	None	Easy	2019-05-03	0		2100
2017-03-14 22:47:00	2017-03-16 21:33:00	87404	1001b	31417	2017-03-14	500	Ham And Cheese Omlette And Watermelon		All of it	Nothing			Baked Chicken Broccoli Egg Salad Potato Salad Watermelon	9a6ee496-6659-4db9-8f75-2d48d2c4a817.jpg	All of it	Peanuts and chocolate mint candies		Base purified water				Coffee or tea					Good									None	Less than 30 mins	None	Easy	2019-09-06	1	Hard and formed (like a cigar)	2130
2017-03-16 09:26:00	2017-03-16 21:33:00	124741	1001b	31517	2017-03-15	530	Ham And Cheese Omlette And Watermelon		All of it	Beef Steak Mixed Boiled Veggies And Watermelon And Pasta Salad	629b00d2-1ef6-4462-8f0c-9fb307b28210.jpg	All of it	Nothing		All of it	Peanuts		Base purified water				Coffee or tea					Good									None	Less than 30 mins	None	Easy	2019-09-06	1	Soft and formed (like peanut butter)	2200
2017-03-16 21:33:00	2017-03-16 21:34:00	43653	1001b	31617	2017-03-16	530	Ham And Cheese Omlette And Watermelon	e96e5053-b663-46b9-8c6e-17ebeb2c932c.jpg	All of it	Baked Chicken, Brussels Sprouts, Mixed Veggies And Watermelon		All of it	Nothing			None		Base purified water				Coffee or tea					Good									None	30 mins to 1 hour	Cardio	Moderate	2019-09-06	1	Soft and formed (like peanut butter)	2200
2017-03-19 08:55:00	2017-03-19 21:19:00	213674	1001b	31717	2017-03-17	500	Ham And Cheese Omlette And Watermelon	037fdb74-3a06-4fc0-88ce-527de71488b5.jpg	All of it	Nothing			Nothing			Peanuts and chips		Base purified water				Coffee or tea					Good									None	Less than 30 mins	None	Easy	2019-09-06	1	Soft and formed (like peanut butter)	2200
2017-03-19 21:22:00	2017-03-19 21:22:00	44855	1001b	31917	2017-03-19	600	Ham And Cheese Omlette And Watermelon	f057fa26-42be-4999-8e79-d0a4469e5621.jpg	All of it	Subway Sandwhich W/ Salami Ham Cheese Spinach Mayo And Mustard		All of it	Nothing- Fasting			None		Base purified water				Coffee or tea					Good							Muscle strain		Doxicycline	30 mins to 1 hour	Sports- ultimate frisbee	Moderate	2019-09-06	1	Soft and formed (like peanut butter)	2100
2017-03-21 20:32:00	2017-03-22 00:12:00	122466	1001b	32017	2017-03-20	500	Ham And Cheese Omlette And Watermelon	fa8719c6-da80-487f-8a83-76b6fc198a80.jpg	All of it	Nothing			Baked Chicken Mixed Boiled Veggies And Watermelon		All of it	None		Base purified water				Coffee or tea					Good									Doxycicline	1 to 2 hours	Cardio and weights		2019-09-06	1	Soft and formed (like peanut butter)	2200
2017-03-22 00:14:00	2017-03-22 00:14:00	13284	1001b	32117	2017-03-21	500	Nothing			Pork Chop And Boiled Broccoli And A Lot Of Guacamole		All of it	Brussels Sprouts Carrots Turkey Potato Salad And A Lot Of Guacamole	01efdb29-5a35-4d7f-b3ce-9e56086d54b4.jpg	All of it	None		Base purified water				Coffee or tea					Good									Doxycycline	1 to 2 hours	Cardio and weights		2019-09-06	1	Soft and formed (like peanut butter)	2230
2017-03-22 20:10:00	2017-03-22 20:10:00	71751	1001b	32217	2017-03-22	530	Ham And Cheese Omlette And Watermelon		All of it	Chicken Vega Carrots Green Beans And Broccoli And Watermelon And Egg Salad	55136cf8-29bc-411c-bbfa-935ddc1e15de.jpg	All of it	Nothing			Two yogurts		Base purified water				Coffee or tea					Good									Doxycicline	1 to 2 hours		Moderate	2019-09-06	1	Soft and formed (like peanut butter)	2200
2017-03-24 11:04:00	2017-03-26 10:01:00	140083	1001b	32317	2017-03-23	530	Ham And Cheese Omlette And Watermelon	86c47b0f-bb45-44c5-9ade-771bf43c4e6d.jpg		Pork Strips And Green Beans And Guacamole		All of it	Nothing			Mint and chocolate canies		Base purified water				Coffee or tea					Good									None	1 to 2 hours	Cardio and weights	Moderate	2019-09-06	1	Soft and formed (like peanut butter)	2200
2017-03-24 20:55:00	2017-03-26 10:01:00	35411	1001b	32417	2017-03-24	530	Ham And Cheese Omlette Watermelon And A Muffin	426d9f4e-5279-417f-90c0-d4874f7029e0.jpg	All of it	Mothing			Beef Stew Broccoli Fried Carrots Watermelon And Oranges	2910a659-7268-43b2-8167-f996c1a2e2c2.jpg	All of it	Peanuts		Base purified water				Coffee or tea					Good									Doxycicline	Less than 30 mins	None	Easy	2019-09-06	2	Loose and unformed (like a thick milkshake)	2200
2017-04-02 23:24:00	2017-04-02 23:24:00	158	1001b	32717	2017-03-27	400	Nothing		All of it	Nothing			Fried Rice With Chicken Snd Veggies		All of it	None	Bottled water	Base purified water									Good									Doxycicline	Less than 30 mins	None	Easy	2019-02-01	0		2200
2017-04-02 23:27:00	2017-04-02 23:27:00	176	1001b	32817	2017-03-28	430	Scrammbled Eggs Rice Woth Red Beans And Cheese		All of it	Nothing			Fried Rice With Shrimp And Veggies		All of it	Almonds	Bottled water										Good									Doxycicline	Less than 30 mins	None	Easy	2019-02-01	2	Loose and unformed (like a thick milkshake)	2000
2017-04-02 23:30:00	2017-04-02 23:30:00	172	1001b	32917	2017-03-29	430	Scrambled Eggs Rice Woth Red Beans And Cheese		All of it	Army MRE		All of it	Nothing		All of it	Almonds	Bottled water										Good									Doxycicline	Less than 30 mins	None	Easy	2019-05-03	1	Loose and unformed (like a thick milkshake)	2030
2017-04-02 23:33:00	2017-04-02 23:33:00	153	1001b	33017	2017-03-30	430	Scrambled Eggs And Rice With Red Beans And Cheese		All of it	Army Mre		All of it	Nothing		All of it	Almonds	Bottled water										Good									Doxycicline	Less than 30 mins	None	Easy	2019-05-03	1	Loose and unformed (like a thick milkshake)	2100
2017-04-02 23:36:00	2017-04-02 23:36:00	161	1001b	33117	2017-03-31	430	Fried Egg With Rice And Red Beans And Cheese		All of it	Nothing			Baked Chicken And Rice And Broccoli		All of it	Almonds	Bottled water	Base purified water									Good									None	Less than 30 mins	None	Easy	2019-05-03	0		2200
2017-04-02 23:38:00	2017-04-02 23:38:00	166	1001b	40117	2017-04-01	530	Nothing		All of it	Corned Beef And Rice And A Salad		All of it	Nothing			Peanuts		Base purified water									Good									None	2+ hours	Cardio and weights		9+	1	Loose and unformed (like a thick milkshake)	2100
2017-04-04 21:10:00	2017-04-04 21:10:00	77070	1001b	40417	2017-04-04	445	Nothing - Fasting			Turkey Breast, Bread Stuffing, Brussels Sprouts, Guacamole		All of it	Beef Fajita, Green Beans, Chocolate Cake		All of it	None											Good									None	1 to 2 hours	Cardio and wgts	Moderate	2019-09-06	2	Liquid (like water)	2200
2017-04-05 23:30:00	2017-04-07 23:38:00	94806	1001b	40517	2017-04-05	600	Ham And Cheese Omlette Sausage And Biscuit W Gravy And Watermelon	52e8384b-3ec8-489a-a010-2a9d0b3b3b5a.jpg	3/4 of it	Roast Pork, Roast Veggies, Boiled Spinach, Rice, Watermelon, Marshmallow Fruit	b0c70c93-a988-4508-85ee-0b1f6578936b.jpg	3/4 of it	Nothing			Peanut butter crackers		Base purified water				Coffee or tea					Ill		Gastrointestinal issues						Cramp	None	Less than 30 mins	None	Easy	2019-09-06	6+	Liquid (like water)	2130
2017-04-06 21:03:00	2017-04-07 23:39:00	77531	1001b	40617	2017-04-06	445	Scrambled Eggs Biscuit W Gravy One Piece Of Bacon And Watermelon	06f0f393-178c-4bf7-9c9c-498619ca4b12.jpg	All of it	Backed Chicken, Potato Salad, Green Beans, And Jalepeno Poppers	be2086df-55c0-4d6b-9407-4719e0c9c9c8.jpg	All of it	Beef Fajitas And Macoroni Salad And Cheese Sticks	288f4b78-b1dd-44ba-9d90-5ecb5dcdb61b.jpg	All of it	None		Base purified water				Coffee or tea					Good									None	1 to 2 hours	Weights and cardio		2019-09-06	1	Loose and unformed (like a thick milkshake)	2200
2017-04-07 23:42:00	2017-04-07 23:42:00	95971	1001b	40717	2017-04-07	500	Scrambled Eggs Sausage Hash Brown And Watermelon	efaaa1b6-c85c-4f01-9cf1-1b3064ee6bb6.jpg	All of it	Nothing			Pepped Steak And Macoroni Salad And Squash		All of it	Peanut butter crackers		Base purified water				Coffee or tea					Good									None	30 mins to 1 hour	Weights	Moderate	2019-09-06	1	Loose and unformed (like a thick milkshake)	2200
2017-04-09 10:29:00	2017-04-10 08:05:00	125199	1001b	40817	2017-04-08	530	Ham And Cheese Omlette Biscuit W Gravy And Watermelon And Pineaple	cead7933-34d6-4fab-9791-9213a2b31bf3.jpg	All of it	Nothing			Chicken Fajita And Spinach And Bread Pudding		All of it	Peppermint patty candies and almonds		Base purified water									Good									None		None	Easy	2019-09-06	1	Loose and unformed (like a thick milkshake)	2200
2017-04-10 08:07:00	2017-04-10 08:07:00	77866	1001b	40917	2017-04-09	515	Ham And Cheese Omlette And Buiscuit W Gravy And Watermelon	a3dae12c-6ddd-4eef-896d-1b03c49a4571.jpg	All of it	Nothing - Fasting			Nothing - Fasting			None		Base purified water									Good									None	1 to 2 hours	Cardio and weights		2019-09-06	1	Soft and formed (like peanut butter)	2100
2017-04-10 20:16:00	2017-04-10 20:16:00	43736	1001b	41017	2017-04-10	530	Nothing - Fasting			Nothing - Fasting			Nothing - Fasting			None		Base purified water									Good									None	1 to 2 hours	Weights	Moderate	2019-09-06	0		2100
2017-04-12 14:42:00	2017-04-16 09:52:00	152765	1001b	41117	2017-04-11	445	Ham And Cheese Omlette And Watermelon	451ebda2-4150-488d-bb19-2aba9f0f157e.jpg	All of it	Fried Beef Brussels Srouts Gaucamole Chips	1a9301d2-c860-490f-9b04-2b39d7ef4555.jpg	All of it	Chicken Legs Carrots Broccoli And Salad	148df5dd-10eb-4e02-a066-0cf5bef6581c.jpg	All of it	None		Base purified water				Coffee or tea					Good									None	1 to 2 hours	Cardio and weights		2019-09-06	0		2130
2017-04-13 09:00:00	2017-04-16 09:52:00	65900	1001b	41217	2017-04-12	500	Nothing			Steak And Potato Wedges And Boiled Beans And Carrots And Salad	f426f3b9-875c-44b9-a99a-b925f987c736.jpg	3/4 of it	Nothing			Almonds		Base purified water				Coffee or tea					Good									None	1 to 2 hours	Cardio and weights		2019-09-06	1	Soft and formed (like peanut butter)	2200
2017-04-14 09:15:00	2017-04-16 09:52:00	87302	1001b	41317	2017-04-13	500	Ham And Cheese Omlette W Salsa And Watermelon	2650ef76-7700-4e88-a749-f646a53af3fe.jpg	All of it	Steak Strips And Brussels Sprouts			Nothing			None		Base purified water				Coffee or tea					Good									None	2+ hours	Cardio and weights		2019-09-06	1	Soft and formed (like peanut butter)	2200
2017-04-16 09:56:00	2017-04-16 09:56:00	175229	1001b	41417	2017-04-14	445	Ham And Cheese Omlette And Sausage And Pineapple And Watermelon	7e7db608-a9a9-4d15-a77c-f9f5cf48f3d2.jpg	All of it	Broccoli Corned Beef Rice Pasta Salad And A Little Bit Of Guacamole	b6ab8973-6854-4edc-aefa-e24fa28fe304.jpg	3/4 of it	Nothing			Almonds and perperment chocolate patties		Base purified water				Coffee or tea					Good									None	1 to 2 hours	Cardio and weights		2019-09-06	1	Soft and formed (like peanut butter)	2200
2017-04-16 09:59:00	2017-04-16 10:00:00	238	1001b	41517	2017-04-15	530	Ham And Cheese Omlette And Watermelon		All of it	Nothing			Nothing		All of it	Almonds		Base purified water				Coffee or tea					Good									None	1 to 2 hours	Cardio and weights		2019-09-06	1	Hard and formed (like a cigar)	2200
2017-04-18 08:26:00	2017-04-18 08:26:00	167206	1001b	41617	2017-04-16	500	Nothing			Nothing			Pork Ribs, Boiled Veggies And Chocolate Cake		All of it	None		Base purified water				Coffee or tea					Good									None	2+ hours	Cardio and weights		2019-09-06	2	Soft and formed (like peanut butter)	2200
2017-04-18 08:29:00	2017-04-18 08:29:00	172	1001b	41717	2017-04-17	330	None - Fasting			Nothing - Fasting			Beef Fakita And Boiled Mixed Veggies And Chocolate Cake		All of it	None		Base purified water				Coffee or tea					Good									None	Less than 30 mins	None	Easy	2019-09-06	2	Hard and formed (like a cigar)	2130
2017-04-19 14:26:00	2017-04-20 00:07:00	107783	1001b	41817	2017-04-18	500	Nothing			Nothing			Nothing					Base purified water				Coffee or tea					Good									None	30 mins to 1 hour	Cardio	Easy	2019-09-06	1	Hard and formed (like a cigar)	2200
2017-04-20 00:09:00	2017-04-20 00:09:00	34990	1001b	41917	2017-04-19	445	Nothing			Roast Beef Peas Green Beans And Salad And Cherry Pie		All of it	Roast Pork Boiled Collard Greens Boiled Veggies And Peas	e0e59715-3e3d-42c5-b316-4e01c9cbf3ea.jpg	All of it	None		Base purified water				Coffee or tea					Good									None	Less than 30 mins	None	Easy	2019-09-06	1	Hard and formed (like a cigar)	2230
2017-04-20 21:28:00	2017-04-20 21:28:00	76774	1001b	42017	2017-04-20	500	Nothing, Fasting			Nothing - Fasting			Nothing - Fasting			None		Base purified water				Coffee or tea					Good									None	30 mins to 1 hour	Army pt test	Moderate	2019-09-06	1	Hard and formed (like a cigar)	2200
2017-04-23 11:18:00	2017-04-26 20:59:00	222563	1001b	42217	2017-04-22	520	Nothing - Fasted			Nothing - Fasted			Baked Chicken Fried Rice Broccoli And Watermelon	85f071c7-52a1-48a4-bc53-d85ec6e514e0.jpg	All of it	Almonds		Base purified water									Good									None	Less than 30 mins	None	Easy	2019-09-06	4	Liquid (like water)	2100
2017-04-25 02:06:00	2017-04-26 20:59:00	119	1001b	42417	2017-04-24	530	Nothing			Nothing Fasting			Nothing Fasting			None		Base purified water				Coffee or tea					Good									None	Less than 30 mins	None	Easy	2019-09-06	1	Soft and formed (like peanut butter)	2330
2017-04-25 22:37:00	2017-04-25 22:37:00	73853	1001b	42517	2017-04-25	530	Ham And Cheese Omlette And Buscuit W Gravy And Watermelon	f01fa8b9-0716-49ef-988a-e50f7b32a7ce.jpg	All of it	Chicken And Broccoli And Pork Chop And Pork Chop	485d02a7-c789-4e54-9e2e-d7e81e3af5ab.jpg	All of it	Nothing			None		Base purified water				Coffee or tea					Good									None	Less than 30 mins	None	Easy		1	Hard and formed (like a cigar)	2100
2017-04-26 20:59:00	2017-04-26 20:59:00	80543	1001b	42617	2017-04-26	500	Nothing			Egg Salad Peas Tomatoes Pork Chop And Mixed Veggies	b07369aa-bc21-40a0-99d2-994a65dd2acb.jpg	All of it	Chicken Cordon Bleu Beets And Rice	1807a7ee-b225-4997-a5df-6b2c3f45277c.jpg				Base purified water				Coffee or tea					Good									None	Less than 30 mins	None	Easy	2019-09-06	1	Hard and formed (like a cigar)	2100
2017-04-27 21:37:00	2017-04-27 21:37:00	88677	1001b	42717	2017-04-27	500	Nothing			Peas And Egg Salad And Bread Pudding		All of it	Nothing			Yogurt		Base purified water				Coffee or tea					Good									None	1 to 2 hours	Weights and cardio	Challenging	2019-09-06	1	Soft and formed (like peanut butter)	2200
2017-05-11 08:26:00	2017-05-11 08:26:00	144238	1001b	51017	2017-05-10	500	Omlwtte Scrambled Ehgs With Cheese And Salsa Sausage And Peaches And An Orange	657a27cb-e09e-4d0b-8c9c-6382f0b560f0.jpg	All of it	Yogurt		All of it	Peas Pork Chop Beets Egg Salad Watermelon And Fruit Salad	a36fc456-aeab-4ea1-bdff-111995891393.jpg	3/4 of it	Nonenone		Base purified water									Good						Rash			Benedryl and oral steroids for rash	Less than 30 mins	Mone	Easy	2019-09-06	1	Soft and formed (like peanut butter)	2300
2017-05-11 20:01:00	2017-05-11 20:01:00	41735	1001b	51117	2017-05-11	500	Ham And Cheese Omlette Bacon Refried Beans Salsa Watermelon	9ea78c29-aeeb-40a8-8bc7-8a98df076d54.jpg	All of it	Baked Chicken Brussels Sprouts Carrots Gaucamole With Chips	57cdbb37-3627-4750-b8d4-70c540b23250.jpg	All of it	Salsbury Steak Peas And Carrots And Gaucamole		All of it	None		Base purified water				Coffee or tea					Good						Rash			Steroids and benadryl for rash	Less than 30 mins	None	Easy	2019-09-06	1	Soft and formed (like peanut butter)	2200
2017-05-14 22:40:00	2017-05-14 22:40:00	268754	1001b	51317	2017-05-13	500	Ham And Cheese Omlette And Watermelon		All of it	Chicken Fajita	d890292d-61eb-452a-86c7-7219fac86d31.jpg	All of it	Nothing, Beginning Fast			None		Base purified water				Coffee or tea					Good									None	1 to 2 hours	Cardio and weights		2019-09-06	1	Soft and formed (like peanut butter)	2030
2017-05-14 22:45:00	2017-05-14 22:45:00	275	1001b	51417	2017-05-14	700	Nothing - Fasted			Nothing Fasting			Nothing- Fasting			None		Base purified water									Good						Rash			Benadryl and oral steroid	Less than 30 mins	None	Easy	2019-09-06	0		2100
2017-05-15 22:16:00	2017-05-15 22:16:00	84639	1001b	51517	2017-05-15	530	Nothing- Fasting			Nothing - Fasting			Nothing - Fasting					Base purified water				Coffee or tea					Good						Rash			Steroids and antihystene for rash	Less than 30 mins	None	Easy	2019-09-06	1	Hard and formed (like a cigar)	2030
2017-06-02 19:43:00	2017-06-03 11:41:00	41515	1001b	60217	2017-06-02	530	Ham And Cheese Omlette And Watermelon	0e8f3385-0066-44fd-9420-5617b94882fb.jpg	All of it	Nothing			Shrimp Linguone Peas And Carrots And Egg And Pasta Salad	340d75dd-d645-488c-a031-e49723f87722.jpg	All of it	Almonds		Base purified water				Coffee or tea					Good									None	Less than 30 mins	None	Easy	2019-09-06	1	Soft and formed (like peanut butter)	2100
2017-06-04 14:17:00	2017-06-04 19:29:00	153198	1001b	60317	2017-06-03	700	Nothing			Steak And Asparagus And Watermelon		All of it	Tirkey A La King And Rice And Spinach		All of it	Almonds		Base purified water									Good									None		None	Easy	2019-09-06	1	Soft and formed (like peanut butter)	2100
2017-06-04 19:31:00	2017-06-04 19:31:00	18869	1001b	60417	2017-06-04	700	Nothing				e1827989-5730-4b34-acb6-a1ac53c74065.jpg		Nothing			Almonds		Base purified water									Good									None	2+ hours	Cardio weights and ultimate frisbee		2019-09-06	1	Hard and formed (like a cigar)	2100
2017-06-05 20:08:00	2017-06-05 20:08:00	88611	1001b	60517	2017-06-05	530	Nothing- Fasting			Nothing- Fasting			Nothing -fasting			None		Base purified water				Coffee or tea					Good									None	Less than 30 mins	None	Easy		1	Hard and formed (like a cigar)	2100
2017-06-06 23:39:00	2017-06-09 08:00:00	99073	1001b	60617	2017-06-06	445	Ham And Cheese Omlette And Onions And Tomatoes Boscuit W Gravy Bacon And Watermelon And Pinnaple	069d739a-ab22-47d4-b5a5-3778ab59f741.jpg	3/4 of it	Gaucamole			Bbq Chicken, Rice And Cheese On The Economy		All of it	None		Base purified water				Coffee or tea					Good									None	1 to 2 hours	Cardio and weights		2019-09-06	1	Hard and formed (like a cigar)	2200
2017-06-09 08:01:00	2017-06-09 08:01:00	202915	1001b	60717	2017-06-07	530	Ham And Cheese Omlette And Sausage And Biscuit And Gravy And Watermelon	7d72533e-8b0a-4f20-9e01-9d898146c749.jpg		Nothing			Nothing					Base purified water				Coffee or tea					Good									None	Less than 30 mins	None	Easy	2019-09-06	1	Soft and formed (like peanut butter)	2200
2017-06-09 08:05:00	2017-06-09 08:05:00	219	1001b	60817	2017-06-08	500	Nothing		All of it	Chips And Gaucamole		All of it	Steak Strips Peas And Carrots And Cake		All of it	Pepermint patty candies		Base purified water				Coffee or tea					Good									None	Less than 30 mins	None	Easy	2019-09-06	1	Soft and formed (like peanut butter)	2100
2017-06-11 13:44:00	2017-06-11 13:44:00	80557	1001b	61017	2017-06-10	530				Sausage Saurcrout Brocoli Squash	d84f1449-7877-42d6-b760-88dd268f8654.jpg	All of it	Nothing - Fasting			None		Base purified water				Coffee or tea					Good									Ibuprofen	Less than 30 mins	None	Easy	2019-09-06	1	Hard and formed (like a cigar)	2300
2017-06-11 13:46:00	2017-06-11 13:46:00	136	1001b	61117	2017-06-11	500	Nothing - Fasting			Nothing Fasting			Nothing			None		Base purified water				Coffee or tea					Good									None	Less than 30 mins	None	Easy	9+	1	Hard and formed (like a cigar)	2200
2017-06-13 09:14:00	2017-06-18 10:33:00	156430	1001b	61217	2017-06-12	530	Npthing-fasting			Meatloaf Mixed Veggies Watermelon Eggs Beets Coleslaw	449ae575-4318-4edc-9aa7-a81a564b5945.jpg		Pepper Steak Carrots Brussels Sprouts Potato Wedges And Watermelon	a9314d8b-7160-4bcc-a79a-46f339102b7a.jpg	All of it			Base purified water				Coffee or tea					Good									None	1 to 2 hours	Cardio and weights	Moderate	2019-09-06	0		2200
2017-06-13 20:58:00	2017-06-18 10:33:00	42288	1001b	61317	2017-06-13	445	Nothing			Gaucamole And Chips		All of it	Meatballs Rice Brussells Sprouts Cheese Watermelon Eggs Macoroni Salad	9fd338ab-d626-455b-a03a-2dcbf7b4bb98.jpg	All of it	None		Base purified water				Coffee or tea					Good									None	1 to 2 hours	Cardio and weights		2019-09-06	1	Loose and unformed (like a thick milkshake)	2100
2017-06-18 10:33:00	2017-06-18 10:33:00	244828	1001b	61517	2017-06-15	500	Nothing			Steal Strips Guacamole Rice Mixed Veggies Watermelon Mango	e2175cbd-1332-4887-a02f-bbb07bcda028.jpg	All of it	Egg Salad Peas And Watermelon	fd7d0566-b388-402e-ad99-58d73260d00f.jpg	All of it	None		Base purified water				Coffee or tea					Good									None	Less than 30 mins	None	Easy	2019-09-06	1	Soft and formed (like peanut butter)	2100
2017-06-18 10:37:00	2017-06-18 10:37:00	256	1001b	61617	2017-06-16	500	Nothing			Roast Pork And Asparagus And Watermelon		All of it	Baked Chocken. Rice, Boiled Brocoli And Watermelon			Almonds		Base purified water				Coffee or tea					Good									None	1 to 2 hours	Cardio and weights		2019-09-06	1	Soft and formed (like peanut butter)	2200
2017-06-18 10:42:00	2017-06-18 10:42:00	282	1001b	61717	2017-06-17	630	Nothing			Fried Poluck Fish, Pasta , Brocoli, Watermelon And Mango		All of it	Baked Chicken, Mixed Veggies And Watermelon And Mango		All of it	Peppermint patty chocolate candies and almonds		Base purified water									Good									None	Less than 30 mins	None	Easy	2019-09-06	0		2100
2017-06-19 20:32:00	2017-06-25 20:20:00	121817	1001b	61817	2017-06-18	730	Nothing			Bbq Chicken Brussels Sprouts Watermelon And Mango	78a8e36c-085c-4ae3-9d42-e8ad92408f6d.jpg		Egg Rolls Hamberger Patty Brocoli		All of it			Base purified water									Good									None	Less than 30 mins	None	Easy	2019-09-06	1	Soft and formed (like peanut butter)	2030
2017-06-19 21:31:00	2017-06-25 20:21:00	3576	1001b	61917	2017-06-19	500	Nothing Fasted			Nothing Fasted			Veal Steak Pork Ribs Brocoli Salad	fc05a9ae-c535-4b8c-921f-e61ebf9da5e9.jpg	All of it	None		Base purified water				Coffee or tea					Good									None	Less than 30 mins	Npne	Easy	2019-09-06	2	Soft and formed (like peanut butter)	2200
2017-06-21 14:37:00	2017-06-25 20:21:00	147924	1001b	62017	2017-06-20	445	Ham And Cheese Omlette And Hash Brown Bacon And Watermelon	47a05016-fe55-4327-93a8-762d29836427.jpg	All of it				Chicken Rice And Watermelon		All of it	None		Base purified water				Coffee or tea					Good									None	30 mins to 1 hour	Cardio and weights	Moderate	2019-09-06	1	Soft and formed (like peanut butter)	2100
2017-06-21 20:34:00	2017-06-25 20:21:00	21424	1001b	62117	2017-06-21	445	Nothing			Pork Chop Boiled Peas Egg Salad And Fresh Peas	46667651-9ca4-4943-b94c-0225ffe48777.jpg	All of it	Chicken Tenders Beets Brocoli Potato Wedges Peas Olives And Watermelon	755c4e65-5b20-430d-a26f-0bc05373c5c6.jpg	3/4 of it	None		Base purified water				Coffee or tea				Beer, wine, or spirits	Good									None	Less than 30 mins	None	Easy	2019-09-06	1	Soft and formed (like peanut butter)	2230
2017-06-23 10:32:00	2017-06-25 20:21:00	136705	1001b	62217	2017-06-22	430	Nothing			Steak Peas And Carrots Macorono Salad Gaucamole And Chips	465a4f7f-9abd-47f7-9d58-9aa3f7dc2a42.jpg	All of it	Nothing					Base purified water				Coffee or tea				Beer, wine, or spirits	Good									None	Less than 30 mins	None	Easy	2019-09-06	1	Soft and formed (like peanut butter)	2200
2017-06-24 10:47:00	2017-06-25 20:21:00	87290	1001b	62317	2017-06-23	445	Ham And Cheese Omlette Sausage And Watermelon	eaa179cf-7a92-4b26-b7b6-357d1e6a006a.jpg	All of it				Chicken Turkey Cutlet Eggs Brocoli Pasta Slad	b6acc40a-4957-4211-a534-3a40b5ec4b01.jpg	All of it		Bottled water					Coffee or tea				Beer, wine, or spirits	Good									None	Less than 30 mins	None	Easy	2019-09-06	1	Hard and formed (like a cigar)	2200
2017-06-24 19:18:00	2017-06-25 20:21:00	30648	1001b	62417	2017-06-24	600	Ham An Cheese Omlette Refried Beans Bacon Watermelon			Pizza Peas And Cabbage And Eggs	155f1057-e8fc-4459-9661-b0205e02e134.jpg	All of it	Pot Roast Carrots Potatoes Peas Egg	7b83cce6-796e-459b-963a-a22e89289142.jpg	All of it	None		Base purified water									Good									None		None	Easy	2019-05-03	1	Soft and formed (like peanut butter)	2200
2017-06-25 20:23:00	2017-06-25 20:23:00	90292	1001b	62517	2017-06-25	500	Ham And Cheese Omlette Bacon Refied Beans And Watermelon	bb0cb69e-3cf2-43b8-869a-719fa5ca87c0.jpg	All of it	Nothing -fasting			Nothing Fasting			Raw garlic		Base purified water									Good			Headache						Aspirin	Less than 30 mins	None	Easy	2019-09-06	1	Soft and formed (like peanut butter)	2100
2017-06-26 23:26:00	2017-06-26 23:26:00	97384	1001b	62617	2017-06-26	530	Nothing Fasted			Nothing Fasted			Meatloaf And Salad		All of it	None		Base purified water				Coffee or tea					Good									None	Less than 30 mins	None	Easy	2019-09-06	0		2200
2017-06-28 23:10:00	2017-07-01 23:08:00	171842	1001b	62817	2017-06-28	500	Ham And Cheese Omlette With Salsa Sausage And Hashbrown And Watermelon	95dc0a6d-0ea0-43bd-b581-d2505a60713e.jpg	All of it	Roast Pork Collard Greens Mixed Veggies And Watermelon	382943bb-fae9-48b8-a942-5b73a8baf356.jpg	All of it	Spinach Moxed Boiled Veggies And Steak And Watermelon		All of it	None		Base purified water				Coffee or tea					Good									None	1 to 2 hours	Cardio and weights		2019-09-06	1	Hard and formed (like a cigar)	2100
2017-06-29 22:01:00	2017-07-01 23:09:00	82227	1001b	62917	2017-06-29	445	Ham And Cheese Omlette And Bacon And Refried Beans And Watermelon	0eed803b-8934-4149-8c40-d5463d861746.jpg	All of it	Egg Salad Crab Salad Gaucamole Hreen Beans	83c76d7c-c589-4633-ae36-602bcd47ed26.jpg	All of it	Roast Pork Boiled Onions And Peppers And Watermelon		All of it	Peppermint patty candies		Base purified water				Coffee or tea					Good									None	1 to 2 hours	Cardio and weights		2019-05-03	0		2200
2017-06-30 20:17:00	2017-07-01 23:09:00	80160	1001b	63017	2017-06-30	530	Ham And Cheese Omlette Sausage And Watermelon		All of it	Baked Chicken Moxed Veggies Watermelon And Mango	68b77faa-7dcc-42e3-8691-09ee5de1ffc0.jpg	All of it	Peas And Carrots And Chicken Fajita		All of it	Peppermint patty candies	Bottled water										Good									None	Less than 30 mins	Cardio	Easy	2019-05-03	1	Hard and formed (like a cigar)	2200
2017-07-01 23:10:00	2017-07-05 21:36:00	96821	1001b	70117	2017-07-01	630	Ham And Cheese Pmlette And Watermelon	da9d8f5c-212c-49b6-a6d5-3da525fec5ae.jpg	All of it	Steak Creamed Asparagus Peas Watermelon	774dabfa-8f8b-4733-8521-37537f91cba4.jpg	All of it	Nothing			Almonds		Base purified water									Good									None	Less than 30 mins	None	Easy	2019-09-06	2	Hard and formed (like a cigar)	2100
2017-07-02 10:37:00	2017-07-02 10:37:00	41190	1001b	70217	2017-07-02	445	Ham And Cheese Omlette And Biscuit And Gravy And Watermelon		All of it	Mothing Fasting			Nothing Fasting			None		Base purified water				Coffee or tea					Good									None	1 to 2 hours	Cardio and weights	Moderate	2019-09-06	1	Hard and formed (like a cigar)	2100
2017-08-02 23:08:00	2017-08-03 22:50:00	91595	1001b	70217	2017-08-02	430	Ham And Cheese Omlette Hash Brown And Watermelon And Chicken Breast	bd9353f0-d0cc-4ccf-a2e6-8aa22ca6097c.jpg	All of it	Chicken Cordon Blue Peas Rice Brocoli And One Egg	b255eb98-0d34-4b3f-85a6-570aa2b1ecc5.jpg	All of it	Bbq Beef Fried Chicken Peas Spinach Watermelon And Marshmallow Fruit Stuff	0a2b8b74-7d63-4945-a3f5-a0052990498e.jpg	All of it	4 cloves of raw garlic		Base purified water				Coffee or tea					Good									None	1 to 2 hours	Cardio and weights	Challenging	2019-09-06	1	Hard and formed (like a cigar)	2100
2017-07-04 09:15:00	2017-07-05 21:36:00	167905	1001b	70317	2017-07-03	500	Nothing Fasted			Macorono Salad With Eggs And Watermelon		All of it	Fish Rice Peas And Carrots And Macaroni Salad With Eggs	5cb1cdd3-5107-40d3-8159-0e995d3e84ac.jpg	All of it	Peppermint patty candies		Base purified water				Coffee or tea					Good									None	1 to 2 hours	Cardio and weights	Moderate	2019-09-06	1	Hard and formed (like a cigar)	2100
2017-08-03 22:50:00	2017-08-04 22:39:00	85339	1001b	70317	2017-08-03	430	Ham And Cheese Omlette And Watermelon Steak Ranchero Hashbrown	5a11b4b5-0070-45db-b862-48b6460b0b25.jpg	All of it	Chicken Wings Green Beans Chips Gaucamole Egg	d7dff147-d335-495a-8644-485fce22c3e1.jpg	All of it	Salsbury Steak Peas And Carrots Terrialki Steal And Potato Salad	3f07992f-773d-40a4-86a1-a4770c30a7be.jpg	All of it	4 cloves of raw garlic		Base purified water				Coffee or tea					Good									None	1 to 2 hours	Cardio and weights		2019-09-06	1	Hard and formed (like a cigar)	2100
2017-08-04 22:40:00	2017-08-05 15:48:00	85810	1001b	70417	2017-08-04	430	Ham And Cheese Omlette And Watermelon Hash Brown And Refried	d9bf67df-0dad-42ce-98d7-b2c816847a44.jpg	3/4 of it	Nothing			Lasagna Green Beans Watermelon	e85874ce-6542-44a1-ac88-feb1578ce7cf.jpg	All of it	Peanuts		Base purified water				Coffee or tea				Beer, wine, or spirits	Good									None	1 to 2 hours	Cardio and weights		2019-09-06	1	Soft and formed (like peanut butter)	2100
2017-07-04 14:12:00	2017-07-05 21:36:00	17800	1001b	70417	2017-07-04	445	Ham And Cheese Omlette Bacon Biscuit W Gravy Watermelon	62e27ee8-2c54-4c38-a088-4bc7e4f7c63a.jpg	All of it	Fried Chicken Wings Fried Rice Prime Rib Gaucamole Chips And One Egg	5e5483b8-f4e9-41e3-b963-e6816f4e9c17.jpg	All of it	Nothing			None		Base purified water				Coffee or tea				Beer, wine, or spirits	Good									None	1 to 2 hours	Cardio weights		2019-09-06	2	Hard and formed (like a cigar)	2200
2017-07-05 21:38:00	2017-07-05 21:38:00	113190	1001b	70517	2017-07-05	445	Ham And Cheese Omlette And Watermelon			Chicken Cordon Blue Rice And Peas Watermelon And Mixed Fruit	e1147c52-84e9-47c4-9a9e-0cfccf80307e.jpg	All of it	Baked Fish Mixed Veggies Rice Collard Greens Watermelon		All of it	Nothing		Base purified water				Coffee or tea					Good									None	1 to 2 hours	Cardio and weights		2019-09-06	1	Hard and formed (like a cigar)	2100
2017-08-05 19:24:00	2017-08-07 14:03:00	74654	1001b	70517	2017-08-05	600	Ham And Cheese Pmlette Hash Brown Bacon Watermelon And Cantalope	e7338822-2a46-4122-8805-faec16d64dc9.jpg	3/4 of it	None			Chicken And Rice Bbq Pork Peas And Watermelon	9fbfd2ae-958e-4ba0-aa7b-1a67fa83c0e3.jpg	All of it	Peanuts and 4 cloves of raw garlic		Base purified water								Beer, wine, or spirits	Good									None	1 to 2 hours	Cardio and weights		2019-09-06	1	Soft and formed (like peanut butter)	2100
2017-08-07 14:07:00	2017-08-07 14:07:00	153787	1001b	70617	2017-08-06	700	Nothing - Fasting			Nothing - Fasting			Nothing Fasting			None		Base purified water									Good									None	2+ hours	Cardip weights and sports		2019-09-06	1	Soft and formed (like peanut butter)	2100
2017-07-07 14:30:00	2017-07-08 23:05:00	147071	1001b	70617	2017-07-06	445	Ham And Cheese Omlette And Watermelon		All of it	Roast Turkey Green Beans And Potato Salad	3d19386d-65c9-4aa8-830d-b6232ea38e4e.jpg		Salsbury Steak Peas And Carrots Potato Salad And Eggs And Watermelon	a892fff7-b7f2-49cc-8038-561a5353aca9.jpg	All of it	None		Base purified water									Good									None	1 to 2 hours	Cardio and weights		2019-09-06	1	Hard and formed (like a cigar)	2300
2017-07-08 14:04:00	2017-07-08 23:05:00	84868	1001b	70717	2017-07-07	445	Nothing			Spinach Lasagna Brocoli And Macorroni Salad	e38fc95b-b7bf-4aa8-bf3d-4c61c48e200f.jpg	All of it	Chicken And Rice		All of it	None		Base purified water				Coffee or tea					Good									None	1 to 2 hours	Cardio and weights		2019-09-06	1	Hard and formed (like a cigar)	2200
2017-07-08 19:26:00	2017-07-08 23:05:00	19306	1001b	70817	2017-07-08	445	Nothing		All of it	Sausage Rice Egg Salad Gaucamole	79e0b1f6-4e4e-4d54-8600-28223c74d149.jpg	All of it	Pork Chalupa Brocoli Cauliflower And Eggs	36868620-13ab-4501-be00-ed61c7a5afbf.jpg	All of it	Nothing		Base purified water				Coffee or tea					Good									None	1 to 2 hours	Cardio and weights		2019-09-06	1	Soft and formed (like peanut butter)	2100
2017-07-10 19:32:00	2017-07-17 20:24:00	173180	1001b	70917	2017-07-09	445	Nothing - Fasting			Nothing- Fasting			Nothing - Fasting			None		Base purified water				Coffee or tea					Good									None	1 to 2 hours	Cardio and weights	Moderate	2019-09-06			2030
2017-07-10 20:04:00	2017-07-17 20:24:00	1915	1001b	71017	2017-07-10	445	Nothing Fasting			Nothing Fasting			Meatloaf Potatoes Brissels Sprouts And Macproni And Egg Salad	fa202852-9f1f-4c5a-9d1a-c4c8bc954fed.jpg	All of it	None		Base purified water				Coffee or tea				Beer, wine, or spirits	Good									None	Less than 30 mins	None	Easy	2019-09-06	0		2100
2017-07-12 11:04:00	2017-07-17 20:24:00	140394	1001b	71117	2017-07-11	445	Ham And Cheese Omlette Salsa Refried Beans And Bacon	4c6c827e-84a6-40f8-ae52-3e70c3cd5576.jpg	All of it	Chicken Gaucamole Brocoli Chips Green Beans	a2276dfb-e02a-4fb4-9674-762df46b2395.jpg	All of it	Nothing					Base purified water				Coffee or tea				Beer, wine, or spirits	Good									None	1 to 2 hours	Cardio and weighrs					2100
2017-07-13 08:49:00	2017-07-17 20:24:00	78323	1001b	71217	2017-07-12	445	Ham And Cheese Omlette And Beans And Bacon And Watermelon	d0ec12b1-3c25-4c80-82ad-35c844a4628f.jpg	All of it	Roast Turkey Mixed Veggies Watermelon And Oatmeal Cookies						Almonds		Base purified water				Coffee or tea					Good									None	1 to 2 hours	None	Easy	2019-09-06	1	Hard and formed (like a cigar)	2100
2017-07-17 20:25:00	2017-07-17 20:25:00	387353	1001b	71317	2017-07-13	445	Ham And Cheese Omlette Bacon Biscuit W Gravy Watermelon	58fc69fe-eeda-4304-9dc3-321b0aa8668d.jpg	All of it	Pork Chop Rice Mixed Veggies Potato Salad With Eggs	64f60909-2e98-4dfd-baee-015c7940f8b6.jpg	All of it	Jalepeno Poppers Tomato Chicken With Rice Green Beans Potato Salad Woth Egg And Watermelon	1e75b3ec-dcd5-400e-a614-461e73c37b6d.jpg	All of it	Almonds		Base purified water				Coffee or tea					Good									None	1 to 2 hours	Cardio and weights		2019-09-06	1	Soft and formed (like peanut butter)	2000
2017-07-17 20:30:00	2017-07-17 20:30:00	264	1001b	71417	2017-07-14	600	Ham And Cheese Omlette And Watermelon		All of it	Nothing Due To Traveling			Hamburger And French Fries From A Fast Food Restaurant		All of it	Peanuts		Base purified water				Coffee or tea					Good									None	Less than 30 mins	None die to traveling	Easy	2019-09-06	1	Hard and formed (like a cigar)	300
2017-07-17 20:32:00	2017-07-17 20:32:00	150	1001b	71517	2017-07-15	600	Fast Food Breakfast Sandwhich		All of it	Bbq Sandwhich And French Fries		All of it	Nothing			Peanuts		Base purified water				Coffee or tea					Good						Rash			None	Less than 30 mins	None due to traveling	Easy	2019-05-03	1	Soft and formed (like peanut butter)	2000
2017-07-17 21:37:00	2017-07-17 21:37:00	3667	1001b	71617	2017-07-17	530	Nothing			Nothing			Nothing			None		Base purified water				Coffee or tea					Good									None	Less than 30 mins	None	Easy	2019-09-06	1	Hard and formed (like a cigar)	2000
2017-07-17 20:36:00	2017-07-17 20:36:00	213	1001b	71617	2017-07-16	230	Breakfast Sandwhich From Mcdonalds And A Hash Brown		All of it	Hamburger From Mcdonalds And French Fries		All of it	Nothing - Dasting		All of it	Almonds		Base purified water				Coffee or tea					Good									None	Less than 30 mins	None	Easy	2019-05-03	1	Hard and formed (like a cigar)	2100
2017-07-20 08:54:00	2017-07-25 22:40:00	66486	1001b	71917	2017-07-19	500	Ham And Cheese Pmlette And Watermelon			Pork Chop Beets Green Beans Macoroni Salad Eggs Watermelon	b5f1668f-3383-4a41-bbf3-a59fd97579ba.jpg	3/4 of it	Nothing			None		Base purified water				Coffee or tea					Good									None	1 to 2 hours	Cardio and weights		2019-09-06	1	Soft and formed (like peanut butter)	2230
2017-07-21 10:17:00	2017-07-25 22:40:00	91401	1001b	72017	2017-07-20	445	Ham And Cheese And Mushroom Omlette And Watermelon	b8257f07-4e4e-45bc-b511-a8e5c3da76b1.jpg	All of it	Buritos Jalepeno Poppers Peas Andcarrots Egg And Potato Salad	7832c9b6-859e-4f6e-9cc1-144fdad57025.jpg	All of it	Baked Chicken Brussels Sprouts Potato Wedges Potato And Egg Salad	39ac6b23-c876-4737-a9ff-ebdd932602cf.jpg	All of it	None		Base purified water				Coffee or tea					Good									None	30 mins to 1 hour	Cardio and weights		2019-09-06	1	Hard and formed (like a cigar)	2100
2017-07-21 19:43:00	2017-07-25 22:40:00	33911	1001b	72117	2017-07-21	430	Ham And Mushroom Omlette And Sausage And Refied Beans And Watermelon	2b610c91-6bb7-4fc1-82c3-1fbf08c4650b.jpg	All of it	Enchiladas Rice Gaucamole Chips	ba3b60bc-f748-4d13-b3e1-6c08fd2aa608.jpg	All of it	Froed Turkey Cutlet Brocoli And Macoroni Salad	a2a5c73a-8861-49ea-975d-a3503cc2f746.jpg	All of it	None		Base purified water				Coffee or tea					Good									None	1 to 2 hours	Cardio and weights		2019-09-06	1	Soft and formed (like peanut butter)	2100
2017-07-23 15:14:00	2017-07-25 22:40:00	156701	1001b	72217	2017-07-22	430	Ham And Cheese And Salsa Omlette Bacon Refried Beans And Biscuit And Watermelon	d11f3e2a-cce6-4b2e-adda-be40098610ed.jpg	3/4 of it	None			Baked Chicken Potatoes Carrots Onion Rongs Egg Salad	fc126e1c-3a2b-4ed1-8e4f-5165ac8c1b62.jpg	All of it	Peppermint patty candies and peanuts											Good									None	1 to 2 hours	Cardio and weights		2019-09-06	1	Hard and formed (like a cigar)	2200
2017-07-25 22:40:00	2017-07-25 22:40:00	138	1001b	72417	2017-07-24	530	Nothing - Fasting			Nothing - Fasting			Nothing - Fasting			None		Base purified water				Coffee or tea					Good									None	Less than 30 mins	None	Easy	2019-09-06	0		2100
2017-07-25 22:49:00	2017-07-25 22:49:00	547	1001b	72517	2017-07-25	430	Nothing - Fasting			Bbq Beef Green Beans Gaucamole Chips And Watermelon		All of it	Veal Steak Boiled Onions And Green Peppers Potato Salad And Watermelon		All of it	None		Base purified water				Coffee or tea				Beer, wine, or spirits	Good									None	1 to 2 hours	Cardio and weights		2019-09-06	1	Hard and formed (like a cigar)	2100
2017-07-27 08:10:00	2017-07-27 08:10:00	120056	1001b	72617	2017-07-26	430	Ham And Cheese Omlette Hashbrown Refried Beans Cheese And Watermelon	a06ba2c2-99a0-4f58-b259-9a94039ad060.jpg	All of it	Crab Leg Steak Fried Pnions And Mushrooms Asparagus Fruit Salad	b4a260ca-a337-438d-9886-237ad1175b6d.jpg	All of it	Nothing			None		Base purified water				Coffee or tea				Beer, wine, or spirits	Good									None	1 to 2 hours	Cardio and weights	Moderate	2019-09-06	1	Soft and formed (like peanut butter)	2030
2017-07-27 23:36:00	2017-07-27 23:36:00	55585	1001b	72717	2017-07-27	445	Ham And Cheese Omlette And Watermelon And Hashbrown	8d713900-2c73-4267-bff9-611c51ed7a10.jpg	All of it	Ground Beef Green Pepper Tomatoes Green Beans Gaucamole Chips Egg Salad	78e40465-d335-480c-a09d-1768fa3a8bfa.jpg	All of it	Nothing			Peanuts		Base purified water				Coffee or tea					Good									None	1 to 2 hours	Cardio and weights		2019-09-06	1	Hard and formed (like a cigar)	2200
2017-07-28 22:56:00	2017-07-31 14:03:00	83985	1001b	72817	2017-07-28	430	Ham And Cheese Omlette Hashbrown Sausage And Watermelon	8c7d5355-f433-4a51-9c2d-8e071d85a718.jpg	All of it	Baked Chicken Mixed Veggies Fried Okra Potato Salad	999b55c6-2c88-45e9-a372-0450498e115d.jpg	All of it	Bbq Pork Peas And Carrots Macoroni And Egg Salad And Watermelon	505027ec-31dc-4a0f-a407-9a155c9ba7af.jpg		Peanuts		Base purified water				Coffee or tea				Beer, wine, or spirits	Good									None	Less than 30 mins	None	Easy	2019-09-06	1	Soft and formed (like peanut butter)	2100
2017-07-30 09:44:00	2017-07-31 14:03:00	125275	1001b	72917	2017-07-29	430	None			Rice Beef Burrito Cheese Sticks Eggs Spinach Bread Pudding	2a39da2a-a31d-4983-a737-349c7705afbf.jpg					None		Base purified water				Coffee or tea				Beer, wine, or spirits	Good									None	1 to 2 hours	Cardio and weights		2019-09-06	1	Soft and formed (like peanut butter)	2200
2017-07-31 14:05:00	2017-07-31 14:05:00	102053	1001b	73017	2017-07-30	500	Ham And Cheese Omlette Bacon Hash Brown Salsa Watermelon Pinnapple	68e0a999-43f5-4cd0-b52b-d9948f11d9fe.jpg	All of it	Nothing - Fasting			Nothing Fasting			None		Base purified water									Good									Npne	2+ hours	Cardio and weights and sports		2019-09-06	1	Hard and formed (like a cigar)	2030
2017-08-01 06:45:00	2017-08-01 06:46:00	60037	1001b	73117	2017-07-31	430	Nothing - Fasting			Nothing - Fasting			Fish Peas And Carrots Macoroni Salad And Watermelon	001037f0-875b-4210-b16c-e2145bf94dbb.jpg		None		Base purified water				Coffee or tea					Good									None	1 to 2 hours	Cardio and weights		2019-09-06	1	Hard and formed (like a cigar)	2030
2017-08-01 21:41:00	2017-08-02 23:07:00	53728	1001b	80117	2017-08-01	430	Ham And Cheese Omlette Hash Brown And Watermelon And Bacon	fd0cb962-c187-4727-b8cb-69e537467f36.jpg	All of it	Corned Beef Potatoes Guacamole Chos Potato Salad	85db333e-156b-4d03-997a-b0d976f5d617.jpg	All of it	Nothing			4 cloves of raw garlic		Base purified water				Coffee or tea					Good									None	1 to 2 hours	Cardio and weights	Challenging	2019-09-06	0		2000
2017-08-08 07:45:00	2017-08-08 07:45:00	63454	1001b	80717	2017-08-07	300	Ham And Cheese Omlette And Watermelon		All of it	Nothing			Meatloaf Brussels Sprouts Potato Slices Watermelon Jello	eef41f22-612d-48fa-9397-3e5495b48347.jpg	3/4 of it	None		Base purified water									Ill		Gastrointestinal issues	Headache						None	Less than 30 mins	None	Easy	2019-09-06	5	Liquid (like water)	2030
2017-08-09 08:27:00	2017-08-09 08:27:00	88892	1001b	80817	2017-08-08	530	Ham And Cheese Omlette Salsa Bacon Refried Beans And Watermelon	30ad2739-fca8-42b1-93a5-102d7fa2e4a9.jpg		Chicken Green Beans Onions Gaucamole And Chips	3b773c4d-bd8f-4d5c-82bf-ab135ac8d7ec.jpg	All of it	Swiss Steak Onions Brussels Sprouts Potato Salad And Watermelon And Peaches	6c2530ef-c18b-477f-b138-8cb1b628bca9.jpg	All of it	None		Base purified water				Coffee or tea					Good									None	Less than 30 mins	None	Easy	9+			2200
2017-08-09 20:14:00	2017-08-13 21:39:00	42413	1001b	80917	2017-08-09	430	Ham And Cheese Omlette And Hash Brown And Bacon And Watermelon And Sausage And Pinnapple	b0af9062-6aeb-4926-88e8-1ee74f9bf7b8.jpg	All of it	Steak Crab Legs Onions Rice Asparagus Watermelon And Fruit Salad	3982f35e-1ff1-4f59-a38d-2b0a5c64c041.jpg	All of it	Pprk Roast Moxed Veggies Watermelon And Carrot Cake		All of it	None		Base purified water				Coffee or tea					Good									None	30 mins to 1 hour	Cardio and weights	Easy	2019-09-06	1	Hard and formed (like a cigar)	2030
2017-08-11 23:17:00	2017-08-13 21:40:00	49571	1001b	81117	2017-08-11	430	Ham And Cheese Omlette And Hash Brown And Watermelon Sausage And Refried Beans	1c37aea6-b543-4a7f-8df5-75359c516543.jpg	3/4 of it	Steak With Onions And Mushrooms Spinach Macoroni Salad	a674a9bd-22cc-4889-aef4-0085519baa49.jpg	All of it	Bbq Beef Cubes And Rice And Mixed Veggies And Fried Carrots	715dc88d-4459-4c0c-a2db-4118600b488f.jpg		None		Base purified water				Coffee or tea					Good									None	30 mins to 1 hour	Cardio and weights		9+	0		2130
2017-08-12 20:07:00	2017-08-13 21:40:00	75045	1001b	81217	2017-08-12	630	Ham And Cheese Omlette Saisage Hash Brown Refried Beans Watermelon Grapes	ae2b6241-7052-40e5-adca-3725749ef653.jpg	All of it	Corned Beef Green Beans Cornd And Salad	e0c3f5d8-10fa-4b6c-9670-f64118b7bb76.jpg	All of it	Fried Fish Asparagus Watermelon Oranges	eb6c13e9-9533-442f-bf3f-d1c75375763c.jpg	All of it	Yogurt		Base purified water									Good									None	1 to 2 hours	Cardio and weights		9+	2	Hard and formed (like a cigar)	2100
2017-08-13 21:42:00	2017-08-13 21:42:00	92091	1001b	81317	2017-08-13	700	Nothing			Bbq Chicken Peas Mixed Veggoes And Salad	d1a34c5d-2cd1-4507-9e9d-5ad23d1def75.jpg	All of it	Nothing - Fasting			None		Base purified water									Good									Aspirin	2+ hours	Cardio weights and sports	Challenging	2019-09-06	1	Hard and formed (like a cigar)	2100
2017-08-14 19:43:00	2017-08-14 19:43:00	79233	1001b	81417	2017-08-14	434	Nothing Fasting			Nothing Fasting			Nothing Fasting			None		Base purified water				Coffee or tea					Good									None	1 to 2 hours	Cardio and weights		9+	0		2100
2017-08-15 21:00:00	2017-08-15 23:00:00	91063	1001b	81517	2017-08-15	430	Nothing Fasting			Corned Bief Potatoes Hard Bouled Eggs Guacamole Chips And Brocoli	910728c1-4a3a-4035-a051-570f939ec78e.jpg	3/4 of it	Cornish Game Hen Mixed Veggies Mac Salad And Watermelon	8849822e-98b5-414d-a836-db4f9718857f.jpg	3/4 of it	None		Base purified water				Coffee or tea					Good									None	1 to 2 hours	Cardio and weights		9+	0		2030
2017-08-16 21:26:00	2017-08-21 13:37:00	87935	1001b	81517	2017-08-16	430	Nothing			Fried Shrimp Green Beans Pasta Salad	4ed00cce-4dc0-4dfd-8f8a-99b85be80bc1.jpg	All of it	Salad Mixed Veggies Chicken Cordon Blue Watermelon And Mixed Fruit	2b46b6d0-a5ba-41f5-985d-2faed7f89aa6.jpg	All of it	None		Base purified water				Coffee or tea					Good									None	Less than 30 mins	Cardio	Easy	9+	1	Hard and formed (like a cigar)	2030
2017-08-18 11:08:00	2017-08-21 13:37:00	135718	1001b	81717	2017-08-17	430	Ham And Cheese Omlette Fried Chicken Refied Beans Watermelon Pinnapple	e584a067-e98a-4604-87e7-12dfb31fd0c8.jpg	All of it	Pizza Calzone Guacamole Chops And One Egg	8da3f752-752a-4fac-841e-6dfb582373f1.jpg	All of it	Baked Chicken Brussels Sprouts Oranges Watermelon	91c572fa-5e8e-4b25-ae28-ccc3b9166f2c.jpg	All of it	Peanuts chocolate candy		Base purified water				Coffee or tea					Good									None					1	Soft and formed (like peanut butter)	2100
2017-08-18 19:18:00	2017-08-21 13:37:00	29369	1001b	81817	2017-08-18	430	Nothing			Egg Salad Fake Crab Salad Macorpni Salad And Salad	c8b948b4-3fd8-4891-952c-73a4e544abb6.jpg	All of it	Turkey Cutlette Brocoli Macoroni Salad Watermelon	45fa5c9a-b189-403f-bebe-7b16a0a60f40.jpg	All of it	None		Base purified water				Coffee or tea				Beer, wine, or spirits	Good									None	2+ hours	Cardio and weights		2019-09-06	1	Soft and formed (like peanut butter)	2100
2017-08-19 22:45:00	2017-08-21 13:37:00	98837	1001b	81917	2017-08-19	430	Ham And Cheese Omelette And Watermelon		All of it	Bbq Beef Over Rice And Peas And Watermelon		All of it	Nothing			Yogurt		Base purified water								Beer, wine, or spirits	Good									None	1 to 2 hours	Cardio and weights	Moderate	9+	1	Soft and formed (like peanut butter)	2045
2017-08-21 09:15:00	2017-08-21 13:37:00	124216	1001b	82019	2017-08-20	430	None			Bbq Pork Ribs Greens Potato Salad Eggs And Watermelon	6d1057ed-8a1f-4277-8c98-17e59ee0d81a.jpg	All of it	Nothing Fasting			None		Base purified water								Beer, wine, or spirits	Good									None	2+ hours	Cardio weights and sports	Challenging	2019-09-06	1	Soft and formed (like peanut butter)	2030
2017-08-21 23:00:00	2017-08-21 23:00:00	49489	1001b	82117	2017-08-21	430	Nothing - Doing 48 Hr Fast			Nothing			Nothing			Nothing		Base purified water				Coffee or tea					Good									None	30 mins to 1 hour	Cardio	Moderate	2019-09-06	0		2100
2017-08-23 09:50:00	2017-08-23 22:43:00	125396	1001b	82217	2017-08-22	430	Nothing - 48 Hr Fast			Guacamole Veal Steak Eggs Chips	5308c6fc-d332-4983-ad42-68a771f11421.jpg	All of it	Nothing			None		Base purified water				Coffee or tea					Good									None	1 to 2 hours	Cardio and weights		2019-09-06	1	Hard and formed (like a cigar)	2100
2017-08-23 22:45:00	2017-08-23 22:45:00	46495	1001b	82317	2017-08-23	530	Omlette And Watermelon	70bf2bf8-0ff6-4b30-94e4-f18885abac1e.jpg	All of it	Steak Fried Shrimp Asparagus And Watermelon		All of it	Steak Fried Sprimp Spinach Mixed Veggies Watermelon Fruit Salad	1d54fa42-34e8-44fc-951b-a653a918a01d.jpg	All of it	None		Base purified water				Coffee or tea					Good									None	Less than 30 mins	None	Easy	2019-09-06	0		2100
1970-01-11 06:42:00	2017-01-28 23:04:00	604857	1001b	10617	2017-10-06	700	Ham And Cheese Omlette And Waterlon		All of it	Nothing		All of it			All of it	None	Bottled water										Good									None	30 mins to 1 hour	Cardio		2019-09-06	2	Soft and formed (like peanut butter)	2200
