# Supplementary material for: Epidemiology and associated microbiota changes in deployed military personnel at high risk of traveler's diarrhea
Source: PLoS One. 2020 Aug 12;15(8):e0236703. doi: 10.1371/journal.pone.0236703 (PMC7423091; doi:10.1371/journal.pone.0236703)
Supplement: S3 Table — The anova output from lmer results, plus FDR-corrected p-values are shown. (XLSX) [file pone.0236703.s007.xlsx]

## Sheet: TD
Table S3, differential abundance by subject's TD status results
anova output from lmer() results, plus FDR-corrected p-values are shown
===================================
SV	f0015c3b64e80303ed3d858f0618bc43
Taxonomy:	D_0__Bacteria;D_1__Firmicutes;D_2__Clostridia;D_3__Clostridiales;D_4__Ruminococcaceae;D_5__Ruminococcaceae;UCG-013;D_6__gut;metagenome
ANOVA	results:
	Df	AIC	BIC	logLik	deviance	Chisq	Chi	Pr(>Chisq)	FDR corrected
df.null	6	-8.56639	11.2832	10.2832	-20.5664	NA	NA	NA
df.model	7	-25.4999	-2.34202	19.7499	-39.4999	18.9335	1	1.35355e-05	0.0052653
===================================
SV	ad139328ba8ac39c2e5ccef543df2deb
Taxonomy:	D_0__Bacteria;D_1__Firmicutes;D_2__Clostridia;D_3__Clostridiales;D_4__Ruminococcaceae;D_5__Ruminiclostridium 5
ANOVA results:
	Df	AIC	BIC	logLik	deviance	Chisq	Chi Df	Pr(>Chisq)	FDR corrected
df.null	6	-67.2491	-47.3995	39.6245	-79.2491	NA	NA	NA
df.model	7	-78.286	-55.1281	46.143	-92.286	13.0369	1	0.000305412	0.0396017

## Sheet: GI_Distress
Table S3, GI distress results
anova output from lmer() results, plus FDR-corrected p-values are shown
SV	394eda29c886632f514dd94b58381186
Taxonomy	Haemophilus
	Df	AIC	BIC	logLik	deviance	Chisq	Chi Df	Pr(>Chisq)	FDR corrected
df.null	6	168.81	185.96	-78.403	156.81
df.model	7	148.01	168.03	-67.006	134.01	22.793	1	1.805e-06 ***	0.000702
Slopes of Fixed Effects
(Intercept)	Gastrointestinal_issues	standardized_counts	Order
0.329589	1.76703	0.043837	0.004171
SV	26c6e3ed14694582e207478c1f23c21f
Taxonomy	Turicibacter
	Df	AIC	BIC	logLik	deviance	Chisq	Chi Df	Pr(>Chisq)	FDR corrected
df.null	6	196.43	213.59	-92.213	184.43
df.model	7	184.63	204.64	-85.31	170.62	13.806	1	0.0002027 ***	0.0157725
Slopes of Fixed Effects
(Intercept)	Gastrointestinal_issues	standardized_counts	Order
0.47957	1.57572	0.11118	-0.00218
